# Supplementary material for: Silver triflate-catalyzed three-component reaction of 2-alkynylbenzaldehyde, sulfonohydrazide, and α,β-unsaturated carbonyl compound
Source: Royal Society of Chemistry journal article supplement (doi:10.1039/c0cc00905a), 2010-01-01

# Silver Triflate-Catalyzed Three-Component Reaction of 2-Alkynylbenzaldehyde, Sulfonohydrazide, and $\alpha,\beta$ -Unsaturated Carbonyl Compound

Shengqing Ye,<sup>†</sup> Xiaodi Yang,<sup>§</sup> and Jie Wu<sup>\*,†,‡</sup>

<sup>†</sup> Department of Chemistry, Fudan University, 220 Handan Road, Shanghai 200433, China <sup>‡</sup> State Key Laboratory of Organometallic Chemistry, Shanghai Institute of Organic Chemistry, Chinese Academy of Sciences, 354 Fenglin Road, Shanghai 200032, China <sup>§</sup> Laboratory of Advanced Materials, Fudan University, 220 Handan Road, Shanghai 200433, China

jie\_wu@fudan.edu.cn

## Supporting Information

1. General experimental methods (S2)
2. Condition screening, general experimental procedure and characterization data. (S2-S16).
3. <sup>1</sup>H and <sup>13</sup>C NMR spectra of compound **3** (S17-S68).
4. The crystal structure and crystallographic data of compound **3a** (S69).

### General experimental methods:

All reactions were performed in reaction tubes under air atmosphere. Flash column chromatography was performed using silica gel (60-Å pore size, 32–63 μm, standard grade). Analytical thin-layer chromatography was performed using glass plates pre-coated with 0.25 mm 230–400 mesh silica gel impregnated with a fluorescent indicator (254 nm). Thin layer chromatography plates were visualized by exposure to ultraviolet light. Organic solutions were concentrated on rotary evaporators at ~20 Torr (house vacuum) at 25–35°C. Commercial reagents and solvents were used as received. Nuclear magnetic resonance (NMR) spectra are recorded in parts per million from internal tetramethylsilane on the δ scale.

Initial Studies for the reaction of (3-phenylisoquinolinium-2-yl)(tosyl)amide **B** with ethyl acrylate **2a**.

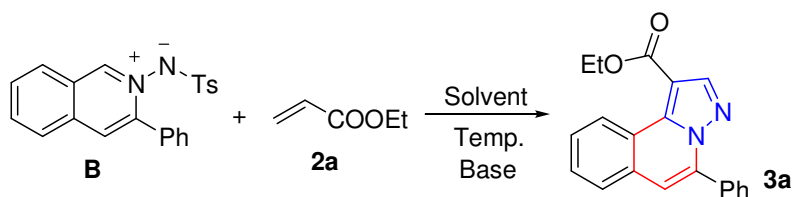

| Entry | <b>2a</b> (equiv) | Temp./°C | Base/equiv                        | Solvent | Yield/% |
|-------|-------------------|----------|-----------------------------------|---------|---------|
| 1     | 2                 | 70       | -                                 | DMF     | 73      |
| 2     | 2                 | r.t.     | -                                 | DMF     | 73      |
| 3     | 2                 | r.t.     | DABCO/2                           | DMF     | 72      |
| 4     | 4                 | r.t.     | DABCO/2                           | THF     | 21      |
| 5     | 4                 | r.t.     | DABCO/2                           | MeCN    | 69      |
| 6     | 4                 | r.t.     | DABCO/2                           | DCE     | 50      |
| 7     | 4                 | r.t.     | DABCO/2                           | EtOH    | 65      |
| 8     | 4                 | r.t.     | DABCO/2                           | Toluene | 16      |
| 9     | 4                 | r.t.     | K <sub>2</sub> CO <sub>3</sub> /2 | MeCN    | 48      |
| 10    | 4                 | r.t.     | PPh <sub>3</sub> /2               | MeCN    | 65      |

|    |   |      |                                   |      |    |
|----|---|------|-----------------------------------|------|----|
| 11 | 4 | r.t. | DMAP/2                            | MeCN | 72 |
| 12 | 4 | r.t. | DBU/2                             | MeCN | 51 |
| 13 | 4 | r.t. | NaOH/2                            | MeCN | 13 |
| 14 | 4 | r.t. | K <sub>3</sub> PO <sub>4</sub> /2 | MeCN | 37 |

Isolated yield based on compound **B**.

Initial Studies for the Three-Component Reaction of 2-Alkynylbenzaldehyde **1a**, Sulfonohydrazide, and Acrylate **2a**.

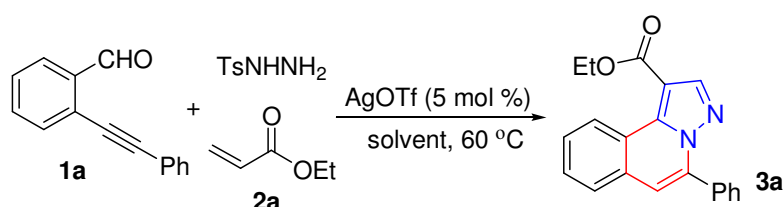

| Entry | Solvent 1/0.5ml | Solvent 2/2ml | Base/equ. | Yield/% |
|-------|-----------------|---------------|-----------|---------|
| 1     | DMF             | DMF           | -         | 51      |
| 2     | DCE             | DCE           | -         | 45      |
| 3     | MeCN            | MeCN          | -         | 21      |
| 4     | EtOH            | EtOH          | -         | 50      |
| 5     | DCE             | DMF           | -         | 64      |
| 6     | DCE             | MeCN          | -         | 69      |
| 7     | DCE             | DMAc          | -         | 88      |
| 8     | DCE             | MeCN          | DMAP/2    | 61      |

Isolated yield based on 2-alkynylbenzaldehyde **1a**.

*General procedure for three-component reaction of 2-alkynylbenzaldehyde, sulfonohydrazide, and  $\alpha,\beta$ -unsaturated carbonyl compound.*

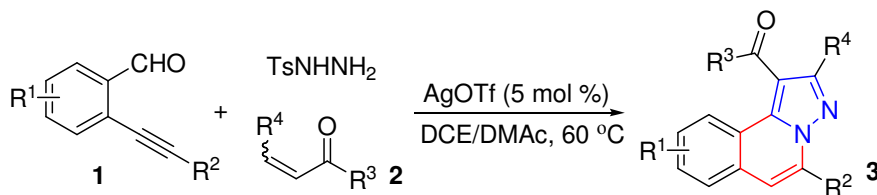

2-alkynylbenzaldehyde **1** (0.2 mmol) was added to a solution of sulfonohydrazide (0.2 mmol) in DCE (0.5 mL). After stirred at room temperature for 30 minutes, AgOTf (0.01 mmol) was added and the solution was stirred at 60 °C for 1 hours. Subsequently, DMAc (2 mL) and  $\alpha,\beta$ -unsaturated carbonyl compound **2** (0.4 mmol, 2 equiv) was added and the mixture was stirred at 60 °C. After completion of reaction as indicated by TLC, the reaction was quenched with aqueous NH<sub>4</sub>Cl (10 mL, 1.0 M), extracted with EtOAc (2 x 10 mL), dried by anhydrous Na<sub>2</sub>SO<sub>4</sub>. Evaporation of the solvent followed by purification on silica gel provided the product **3**.

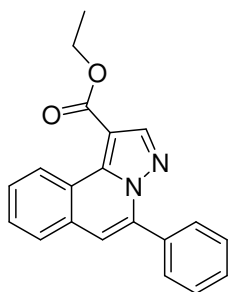

Ethyl 5-phenyl*H*-pyrazolo[5,1-*a*]isoquinoline-1-carboxylate (**3a**)

<sup>1</sup>H NMR (400 MHz, CDCl<sub>3</sub>)  $\delta$  1.45 (t, *J* = 7.3 Hz, 3H), 4.43 (q, *J* = 7.3 Hz, 2H), 7.19 (s, 1H), 7.49–7.55 (m, 3H), 7.62–7.68 (m, 2H), 7.75 (d, *J* = 8.3 Hz, 1H), 7.80 (d, *J* = 8.3 Hz, 2H), 8.47 (s, 1H), 9.87 (d, *J* = 7.8 Hz, 1H); <sup>13</sup>C NMR (100 MHz, CDCl<sub>3</sub>)  $\delta$  14.4, 60.3, 108.0, 115.2, 123.8, 126.9, 127.6, 127.7, 128.4, 129.4, 129.6, 130.7, 133.5, 138.3, 139.5, 145.0, 163.9; HRMS (ESI) calcd for C<sub>20</sub>H<sub>16</sub>N<sub>2</sub>O<sub>2</sub>: 339.1109 (M + Na<sup>+</sup>), found: 339.1084.

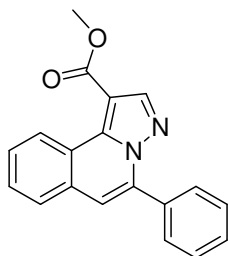

Methyl 5-phenyl*H*-pyrazolo[5,1-*a*]isoquinoline-1-carboxylate (**3b**)

<sup>1</sup>H NMR (400 MHz, CDCl<sub>3</sub>)  $\delta$  3.95 (s, 3H), 7.19 (s, 1H), 7.49–7.55 (m, 3H), 7.62–7.66 (m, 2H), 7.74 (d, *J* = 8.3 Hz, 1H), 7.80 (d, *J* = 8.3 Hz, 2H), 8.46 (s, 1H),

9.85 (d,  $J = 7.8$  Hz, 1H);  $^{13}\text{C}$  NMR (100 MHz,  $\text{CDCl}_3$ )  $\delta$  51.6, 107.6, 115.3, 123.7, 126.9, 127.6, 128.4, 129.4, 129.5, 129.6, 130.7, 133.4, 138.3, 139.5, 145.0, 164.2; HRMS (ESI) calcd for  $\text{C}_{19}\text{H}_{14}\text{N}_2\text{O}_2$ : 325.0953 ( $\text{M} + \text{Na}^+$ ), found: 325.0924.

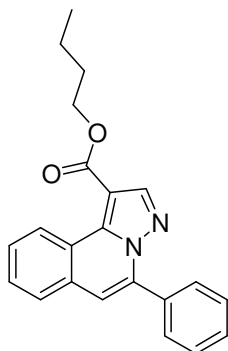

Butyl 5-phenyl*H*-pyrazolo[5,1-*a*]isoquinoline-1-carboxylate (**3c**)

$^1\text{H}$  NMR (400 MHz,  $\text{CDCl}_3$ )  $\delta$  1.00 (t,  $J = 7.3$  Hz, 3H), 1.50-1.52 (m, 2H), 1.81-1.82 (m, 2H), 4.38 (t,  $J = 6.8$  Hz, 2H), 7.19 (s, 1H), 7.50-7.54 (m, 3H), 7.63-7.67 (m, 2H), 7.75-7.81 (m, 3H), 8.47 (s, 1H), 9.87 (d,  $J = 7.8$  Hz, 1H);  $^{13}\text{C}$  NMR (100 MHz,  $\text{CDCl}_3$ )  $\delta$  13.8, 19.3, 30.8, 64.3, 108.0, 115.2, 123.8, 126.9, 127.6, 127.7, 128.4, 129.4, 129.6, 130.7, 133.5, 138.3, 139.5, 145.0, 163.9; HRMS (ESI) calcd for  $\text{C}_{22}\text{H}_{20}\text{N}_2\text{O}_2$ : 367.1422 ( $\text{M} + \text{Na}^+$ ), found: 367.1417.

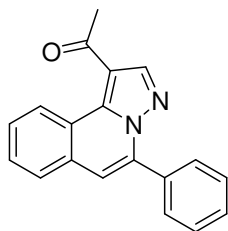

1-(5-Phenyl*H*-pyrazolo[5,1-*a*]isoquinolin-1-yl)ethanone (**3d**)

$^1\text{H}$  NMR (400 MHz,  $\text{CDCl}_3$ )  $\delta$  2.72 (s, 3H), 7.27 (s, 1H), 7.52-7.56 (m, 3H), 7.68-7.70 (m, 2H), 7.78-7.81 (m, 3H), 8.44 (s, 1H), 9.96 (d,  $J = 7.8$  Hz, 1H);  $^{13}\text{C}$  NMR (100 MHz,  $\text{CDCl}_3$ )  $\delta$  29.7, 116.1, 117.2, 124.1, 126.8, 127.7, 128.0, 128.4, 129.5, 129.6, 129.9, 131.0, 133.4, 138.1, 138.8, 145.5, 192.1; HRMS (ESI) calcd for  $\text{C}_{19}\text{H}_{14}\text{N}_2\text{O}$ : 309.1004 ( $\text{M} + \text{Na}^+$ ), found: 309.0992.

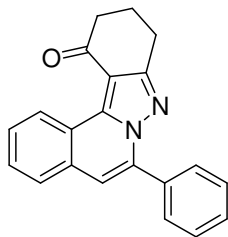

6-Phenyl-10,11-dihydroindazolo[3,2-*a*]isoquinolin-12(9*H*)-one (**3e**)

$^1\text{H}$  NMR (400 MHz,  $\text{CDCl}_3$ )  $\delta$  2.20-2.22 (m, 2H), 2.73 (t,  $J = 6.8$  Hz, 2H), 3.05 (t,  $J = 6.8$  Hz, 2H), 7.25 (s, 1H), 7.50–7.56 (m, 3H), 7.67–7.71 (m, 2H), 7.77 (d,  $J = 8.3$  Hz, 1H), 7.83 (d,  $J = 8.3$  Hz, 2H), 10.11 (d,  $J = 7.3$  Hz, 1H);  $^{13}\text{C}$  NMR (100 MHz,  $\text{CDCl}_3$ )  $\delta$  23.4, 24.3, 40.3, 112.7, 115.8, 123.9, 126.6, 127.6, 128.3, 128.4, 129.5, 129.7, 129.9, 131.0, 133.5, 138.0, 139.3, 159.6, 193.4; HRMS (ESI) calcd for  $\text{C}_{21}\text{H}_{16}\text{N}_2\text{O}$ : 335.1160 ( $\text{M} + \text{Na}^+$ ), found: 335.1151.

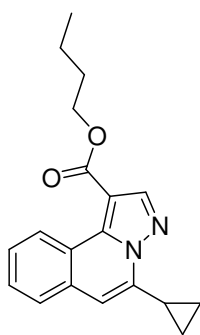

Butyl 5-cyclopropyl*H*-pyrazolo[5,1-*a*]isoquinoline-1-carboxylate (**3f**)

$^1\text{H}$  NMR (400 MHz,  $\text{CDCl}_3$ )  $\delta$  0.89–0.93 (m, 2H), 1.01 (t,  $J = 7.3$  Hz, 3H), 1.18–1.22 (m, 2H), 1.51–1.52 (m, 2H), 1.80–1.82 (m, 2H), 2.66–2.73 (m, 1H), 4.38 (t,  $J = 6.8$  Hz, 2H), 6.82 (s, 1H), 7.58–7.61 (m, 2H), 7.64–7.68 (m, 1H), 8.53 (s, 1H), 9.81 (d,  $J = 7.3$  Hz, 1H);  $^{13}\text{C}$  NMR (100 MHz,  $\text{CDCl}_3$ )  $\delta$  7.1, 11.6, 13.8, 19.3, 30.8, 64.2, 107.9, 109.6, 123.1, 126.2, 126.8, 127.6, 129.1, 130.7, 139.0, 140.6, 144.8, 163.9; HRMS (ESI) calcd for  $\text{C}_{19}\text{H}_{20}\text{N}_2\text{O}_2$ : 331.1422 ( $\text{M} + \text{Na}^+$ ), found: 331.1404.

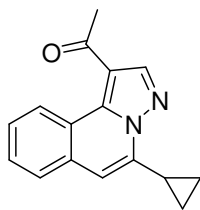

1-(5-Cyclopropyl*H*-pyrazolo[5,1-*a*]isoquinolin-1-yl)ethanone (**3g**)

$^1\text{H}$  NMR (400 MHz,  $\text{CDCl}_3$ )  $\delta$  0.91–0.95 (m, 2H), 1.20–1.24 (m, 2H), 2.69–2.72 (m, 1H), 2.73 (s, 3H), 6.90 (s, 1H), 7.61–7.68 (m, 3H), 8.51 (s, 1H), 9.90 (d,  $J = 7.3$  Hz, 1H);  $^{13}\text{C}$  NMR (100 MHz,  $\text{CDCl}_3$ )  $\delta$  7.1, 11.7, 29.6, 53.4, 110.5, 117.2, 123.4, 126.2, 126.9, 127.9, 129.6, 130.9, 138.4, 140.4, 145.4, 192.0; HRMS (ESI) calcd for  $\text{C}_{16}\text{H}_{14}\text{N}_2\text{O}$ : 273.1004 ( $\text{M} + \text{Na}^+$ ), found: 273.0999.

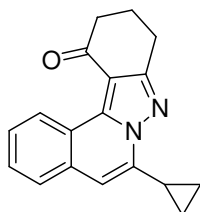

6-Cyclopropyl-10,11-dihydroindazolo[3,2-*a*]isoquinolin-12(9*H*)-one (**3h**)

$^1\text{H}$  NMR (400 MHz,  $\text{CDCl}_3$ )  $\delta$  0.92–0.94 (m, 2H), 1.22–1.25 (m, 2H), 2.25 (m,  $J = 6.4$  Hz, 2H), 2.72–2.76 (m, 3H), 3.14 (t,  $J = 6.4$  Hz, 2H), 6.86 (s, 1H), 7.61–7.69 (m, 3H), 1.04 (d,  $J = 7.3$  Hz, 1H);  $^{13}\text{C}$  NMR (100 MHz,  $\text{CDCl}_3$ )  $\delta$  7.6, 11.6, 23.5, 24.2, 40.1, 109.8, 112.7, 123.1, 125.9, 126.8, 128.2, 129.7, 131.0, 138.9, 140.4, 159.5, 193.4; HRMS (ESI) calcd for  $\text{C}_{18}\text{H}_{16}\text{N}_2\text{O}$ : 299.1160 ( $\text{M} + \text{Na}^+$ ), found: 299.1168.

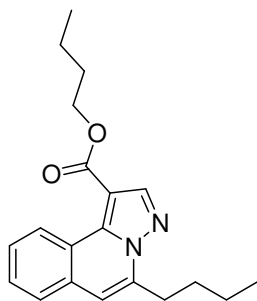

Butyl 5-butyl*H*-pyrazolo[5,1-*a*]isoquinoline-1-carboxylate (**3i**)

$^1\text{H}$  NMR (400 MHz,  $\text{CDCl}_3$ )  $\delta$  0.98–1.03 (m, 6H), 1.48–1.55 (m, 4H), 1.77–1.87 (m,

4H), 3.18 (t,  $J = 7.3$  Hz, 2H), 4.38 (t,  $J = 6.4$  Hz, 2H), 6.99 (s, 1H), 7.59–7.62 (m, 2H), 7.68–7.70 (m, 1H), 8.48 (s, 1H), 9.81 (d,  $J = 7.3$  Hz, 1H);  $^{13}\text{C}$  NMR (100 MHz,  $\text{CDCl}_3$ )  $\delta$  13.8, 13.9, 19.3, 22.5, 29.0, 30.8, 30.9, 64.2, 107.8, 112.2, 123.3, 126.2, 126.8, 127.6, 129.2, 130.7, 139.0, 139.3, 144.7, 164.0; HRMS (ESI) calcd for  $\text{C}_{20}\text{H}_{24}\text{N}_2\text{O}_2$ : 347.1735 ( $\text{M} + \text{Na}^+$ ), found: 347.1706.

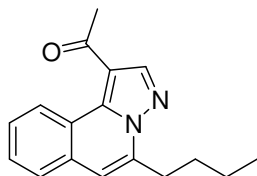

1-(5-ButylH-pyrazolo[5,1-a]isoquinolin-1-yl)ethanone (**3j**)

$^1\text{H}$  NMR (400 MHz,  $\text{CDCl}_3$ )  $\delta$  1.00 (t,  $J = 7.3$  Hz, 3H), 1.50–1.52 (m, 2H), 1.85–1.87 (m, 2H), 2.72 (s, 3H), 3.19 (t,  $J = 7.8$  Hz, 2H), 7.06 (s, 1H), 7.62–7.72 (m, 3H), 8.46 (s, 1H), 9.90 (d,  $J = 7.3$  Hz, 1H);  $^{13}\text{C}$  NMR (100 MHz,  $\text{CDCl}_3$ )  $\delta$  13.9, 22.5, 29.1, 29.6, 30.9, 113.1, 117.0, 123.5, 126.1, 126.8, 127.9, 129.6, 130.9, 138.4, 139.1, 145.3, 192.0; HRMS (ESI) calcd for  $\text{C}_{17}\text{H}_{18}\text{N}_2\text{O}$ : 289.1317 ( $\text{M} + \text{Na}^+$ ), found: 289.1319.

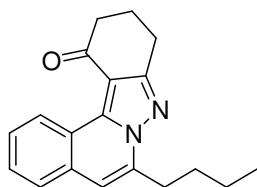

6-Butyl-10,11-dihydroindazolo[3,2-a]isoquinolin-12(9H)-one (**3k**)

$^1\text{H}$  NMR (400 MHz,  $\text{CDCl}_3$ )  $\delta$  1.01 (t,  $J = 7.3$  Hz, 3H), 1.50–1.52 (m, 2H), 1.86–1.88 (m, 2H), 2.23–2.25 (m, 2H), 2.73 (t,  $J = 6.4$  Hz, 2H), 3.10 (t,  $J = 6.4$  Hz, 2H), 3.20 (t,  $J = 7.3$  Hz, 2H), 7.06 (s, 1H), 7.64–7.73 (m, 3H), 10.05 (d,  $J = 7.3$  Hz, 1H);  $^{13}\text{C}$  NMR (100 MHz,  $\text{CDCl}_3$ )  $\delta$  13.9, 22.4, 23.5, 24.2, 29.0, 30.8, 40.1, 112.5, 112.6, 123.3, 125.9, 126.8, 128.2, 129.6, 131.0, 138.8, 139.1, 159.4, 193.3; HRMS (ESI) calcd for  $\text{C}_{19}\text{H}_{20}\text{N}_2\text{O}$ : 315.1473 ( $\text{M} + \text{Na}^+$ ), found: 315.1450.



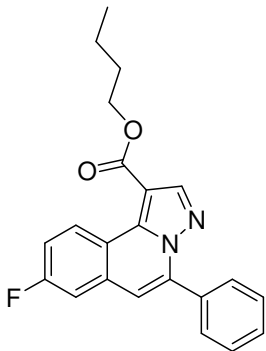

Butyl 8-fluoro-5-phenyl*H*-pyrazolo[5,1-*a*]isoquinoline-1-carboxylate (**3l**)

$^1\text{H}$  NMR (400 MHz,  $\text{CDCl}_3$ )  $\delta$  1.01 (t,  $J = 7.3$  Hz, 3H), 1.50-1.52 (m, 2H), 1.80-1.82 (m, 2H), 4.37 (t,  $J = 6.8$  Hz, 2H), 7.12 (s, 1H), 7.37 (d,  $J = 8.7$  Hz, 2H), 7.52-7.55 (m, 3H), 7.78 (d,  $J = 7.3$  Hz, 2H), 8.45 (s, 1H), 9.95 (d,  $J = 7.3$  Hz, 1H);  $^{13}\text{C}$  NMR (100 MHz,  $\text{CDCl}_3$ )  $\delta$  13.7, 19.3, 30.8, 64.4, 107.7, 111.4 (d,  $^2J_{\text{CF}} = 21.9$  Hz), 114.3 (d,  $^4J_{\text{CF}} = 2.8$  Hz), 116.2 (d,  $^2J_{\text{CF}} = 22.9$  Hz), 120.5, 128.4, 129.5, 129.6, 130.7 (d,  $^3J_{\text{CF}} = 8.6$  Hz), 132.7 (d,  $^3J_{\text{CF}} = 9.5$  Hz), 133.0, 139.2, 139.3, 145.1, 162.6 (d,  $^1J_{\text{CF}} = 249.8$  Hz), 163.8; HRMS (ESI) calcd for  $\text{C}_{22}\text{H}_{19}\text{FN}_2\text{O}_2$ : 385.1328 ( $\text{M} + \text{Na}^+$ ), found: 385.1346.

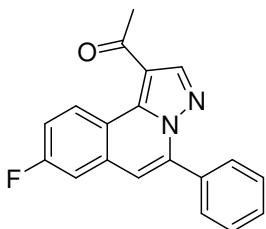

1-(8-Fluoro-5-phenyl*H*-pyrazolo[5,1-*a*]isoquinolin-1-yl)ethanone (**3m**)

$^1\text{H}$  NMR (400 MHz,  $\text{CDCl}_3$ )  $\delta$  2.70 (s, 3H), 7.19 (s, 1H), 7.35-7.40 (m, 2H), 7.52-7.56 (m, 3H), 7.77-7.79 (m, 2H), 8.43 (s, 1H), 10.03-10.07 (m, 1H);  $^{13}\text{C}$  NMR (100 MHz,  $\text{CDCl}_3$ )  $\delta$  29.6, 111.3 (d,  $^2J_{\text{CF}} = 20.9$  Hz), 115.1 (d,  $^4J_{\text{CF}} = 3.8$  Hz), 116.2 (d,  $^2J_{\text{CF}} = 22.9$  Hz), 116.7, 120.8, 128.4, 129.6, 129.7, 131.2 (d,  $^3J_{\text{CF}} = 8.6$  Hz), 132.9, 133.0 (d,  $^3J_{\text{CF}} = 9.6$  Hz), 138.5, 139.1, 145.6, 162.9 (d,  $^1J_{\text{CF}} = 249.8$  Hz), 191.9; HRMS (ESI) calcd for  $\text{C}_{19}\text{H}_{13}\text{FN}_2\text{O}$ : 327.0910 ( $\text{M} + \text{Na}^+$ ), found: 327.0919.

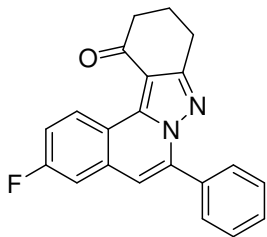

3-Fluoro-6-phenyl-10,11-dihydroindazolo[3,2-*a*]isoquinolin-12(9*H*)-one (**3n**)

$^1\text{H}$  NMR (400 MHz,  $\text{CDCl}_3$ )  $\delta$  2.20-2.22 (m, 2H), 2.73 (t,  $J = 6.4$  Hz, 2H), 3.04 (t,  $J = 6.4$  Hz, 2H), 7.19 (s, 1H), 7.38–7.43 (m, 2H), 7.51–7.55 (m, 3H), 7.82–7.84 (m, 2H), 10.17–10.21 (m, 1H);  $^{13}\text{C}$  NMR (100 MHz,  $\text{CDCl}_3$ )  $\delta$  23.4, 24.2, 40.1, 111.0 (d,  $^2J_{\text{CF}} = 21.9$  Hz), 112.4, 114.9 (d,  $^4J_{\text{CF}} = 2.8$  Hz), 116.3 (d,  $^2J_{\text{CF}} = 22.9$  Hz), 120.6, 128.4, 129.7, 131.4 (d,  $^3J_{\text{CF}} = 8.6$  Hz), 133.0, 133.1, 138.9, 139.0, 159.7, 163.1 (d,  $^1J_{\text{CF}} = 249.8$  Hz), 193.4; HRMS (ESI) calcd for  $\text{C}_{21}\text{H}_{15}\text{FN}_2\text{O}$ : 353.1066 ( $\text{M} + \text{Na}^+$ ), found: 353.1069.

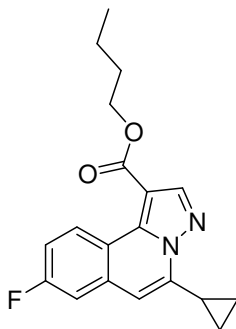

Butyl 5-cyclopropyl-8-fluoro*H*-pyrazolo[5,1-*a*]isoquinoline-1-carboxylate (**3o**)

$^1\text{H}$  NMR (400 MHz,  $\text{CDCl}_3$ )  $\delta$  0.90–0.94 (m, 2H), 1.02 (t,  $J = 7.3$  Hz, 3H), 1.20–1.24 (m, 2H), 1.51-1.53 (m, 2H), 1.80-1.82 (m, 2H), 2.67–2.74 (m, 1H), 4.37 (t,  $J = 6.8$  Hz, 2H), 6.74 (s, 1H), 7.26–7.30 (m, 2H), 8.51 (s, 1H), 9.86 – 9.90 (m, 1H);  $^{13}\text{C}$  NMR (100 MHz,  $\text{CDCl}_3$ )  $\delta$  7.3, 10.6, 13.8, 19.3, 30.8, 64.3, 107.6, 108.6 (d,  $^4J_{\text{CF}} = 3.8$  Hz), 110.8 (d,  $^2J_{\text{CF}} = 21.0$  Hz), 115.5 (d,  $^2J_{\text{CF}} = 22.9$  Hz), 119.8, 130.6 (d,  $^3J_{\text{CF}} = 9.5$  Hz), 132.8 (d,  $^3J_{\text{CF}} = 9.5$  Hz), 138.8, 141.8, 144.9, 162.5 (d,  $^1J_{\text{CF}} = 248.9$  Hz), 163.9; HRMS (ESI) calcd for  $\text{C}_{19}\text{H}_{19}\text{FN}_2\text{O}_2$ : 349.1328 ( $\text{M} + \text{Na}^+$ ), found: 349.1320.

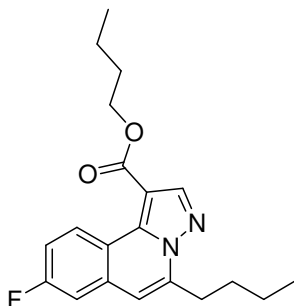

Butyl 5-butyl-8-fluoro*H*-pyrazolo[5,1-*a*]isoquinoline-1-carboxylate (**3p**)

$^1\text{H}$  NMR (400 MHz,  $\text{CDCl}_3$ )  $\delta$  0.98–1.03 (m, 6H), 1.47–1.55 (m, 4H), 1.79–1.86 (m, 4H), 3.17 (t,  $J = 7.8$  Hz, 2H), 4.37 (t,  $J = 6.4$  Hz, 2H), 6.91 (s, 1H), 7.29–7.32 (m, 2H), 8.46 (s, 1H), 9.86–9.89 (m, 1H);  $^{13}\text{C}$  NMR (100 MHz,  $\text{CDCl}_3$ )  $\delta$  13.8, 13.9, 19.3, 22.5, 28.9, 30.8, 30.9, 64.3, 107.5, 110.7 (d,  $^2J_{\text{CF}} = 20.1$  Hz), 111.4 (d,  $^4J_{\text{CF}} = 3.8$  Hz), 115.4 (d,  $^2J_{\text{CF}} = 22.9$  Hz), 120.0, 130.6 (d,  $^3J_{\text{CF}} = 8.6$  Hz), 132.8 (d,  $^3J_{\text{CF}} = 9.5$  Hz), 138.8, 140.5, 144.8, 162.6 (d,  $^1J_{\text{CF}} = 249.8$  Hz), 163.9; HRMS (ESI) calcd for  $\text{C}_{20}\text{H}_{23}\text{FN}_2\text{O}_2$ : 365.1641 ( $\text{M} + \text{Na}^+$ ), found: 365.1630.

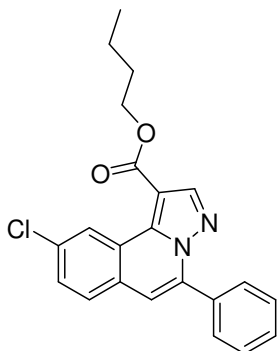

Butyl 9-chloro-5-phenyl*H*-pyrazolo[5,1-*a*]isoquinoline-1-carboxylate (**3q**)

$^1\text{H}$  NMR (400 MHz,  $\text{CDCl}_3$ )  $\delta$  1.01 (t,  $J = 7.3$  Hz, 3H), 1.50–1.52 (m, 2H), 1.80–1.82 (m, 2H), 4.38 (t,  $J = 7.3$  Hz, 2H), 7.14 (s, 1H), 7.51–7.57 (m, 4H), 7.66 (d,  $J = 8.7$  Hz, 1H), 7.78 (d,  $J = 7.8$  Hz, 2H), 8.46 (s, 1H), 9.93 (d,  $J = 1.8$  Hz, 1H);  $^{13}\text{C}$  NMR (100 MHz,  $\text{CDCl}_3$ )  $\delta$  13.8, 19.3, 30.7, 64.5, 108.4, 114.4, 124.6, 127.0, 128.1, 128.4, 128.9, 129.5, 129.6, 129.9, 133.1, 133.4, 138.3, 138.5, 145.1, 163.6; HRMS (ESI) calcd for  $\text{C}_{22}\text{H}_{19}\text{ClN}_2\text{O}_2$ : 401.1033 ( $\text{M} + \text{Na}^+$ ), found: 401.1029.

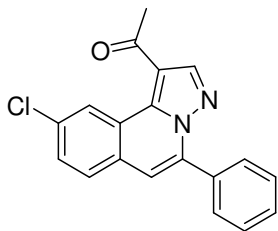

1-(9-Chloro-5-phenyl*H*-pyrazolo[5,1-*a*]isoquinolin-1-yl)ethanone (**3r**)

$^1\text{H}$  NMR (400 MHz,  $\text{CDCl}_3$ )  $\delta$  2.71 (s, 3H), 7.23 (s, 1H), 7.53–7.56 (m, 3H), 7.62 (d,  $J = 8.3$  Hz, 1H), 7.70 (d,  $J = 8.3$  Hz, 1H), 7.79 (d,  $J = 7.8$  Hz, 2H), 8.44 (s, 1H), 10.07 (s, 1H);  $^{13}\text{C}$  NMR (100 MHz,  $\text{CDCl}_3$ )  $\delta$  29.6, 115.3, 117.4, 124.9, 127.4, 128.1, 128.4, 129.2, 129.6, 129.7, 130.4, 133.1, 133.5, 137.9, 138.4, 145.6, 192.0; HRMS (ESI) calcd for  $\text{C}_{19}\text{H}_{13}\text{ClN}_2\text{O}$ : 343.0614 ( $\text{M} + \text{Na}^+$ ), found: 343.0603.

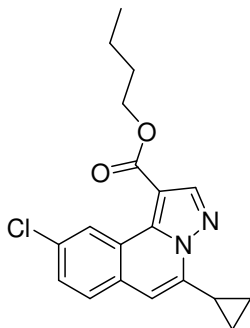

Butyl 9-chloro-5-cyclopropyl*H*-pyrazolo[5,1-*a*]isoquinoline-1-carboxylate (**3s**)

$^1\text{H}$  NMR (400 MHz,  $\text{CDCl}_3$ )  $\delta$  0.89–0.93 (m, 2H), 1.02 (t,  $J = 7.3$  Hz, 3H), 1.19–1.24 (m, 2H), 1.51–1.53 (m, 2H), 1.82–1.84 (m, 2H), 2.66–2.71 (m, 1H), 4.39 (t,  $J = 7.3$  Hz, 2H), 6.76 (s, 1H), 7.51–7.58 (m, 2H), 8.52 (s, 1H), 9.87 (d,  $J = 1.8$  Hz, 1H);  $^{13}\text{C}$  NMR (100 MHz,  $\text{CDCl}_3$ )  $\delta$  7.2, 11.6, 13.8, 19.3, 30.8, 64.5, 108.4, 108.8, 123.9, 126.9, 127.6, 129.0, 129.6, 132.5, 137.9, 141.1, 145.0, 163.7; HRMS (ESI) calcd for  $\text{C}_{19}\text{H}_{19}\text{ClN}_2\text{O}_2$ : 365.1033 ( $\text{M} + \text{Na}^+$ ), found: 365.1020.

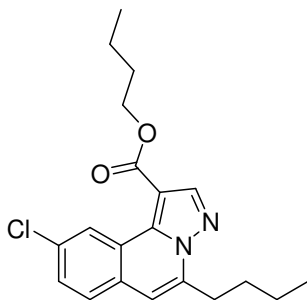

Butyl 5-butyl-9-chloro*H*-pyrazolo[5,1-*a*]isoquinoline-1-carboxylate (**3t**)

$^1\text{H}$  NMR (400 MHz,  $\text{CDCl}_3$ )  $\delta$  0.98–1.04 (m, 6H), 1.47–1.54 (m, 4H), 1.79–1.86 (m, 4H), 3.14 (t,  $J = 7.3$  Hz, 2H), 4.39 (t,  $J = 6.4$  Hz, 2H), 6.91 (s, 1H), 7.51–7.59 (m, 2H), 8.46 (s, 1H), 9.85 (s, 1H);  $^{13}\text{C}$  NMR (100 MHz,  $\text{CDCl}_3$ )  $\delta$  13.8, 13.9, 19.3, 22.5, 28.9, 30.8, 30.9, 64.5, 108.2, 111.4, 124.1, 126.8, 127.5, 128.9, 129.6, 132.5, 137.8, 139.7, 144.8, 163.7; HRMS (ESI) calcd for  $\text{C}_{20}\text{H}_{23}\text{ClN}_2\text{O}_2$ : 381.1346 ( $\text{M} + \text{Na}^+$ ), found: 381.1347.

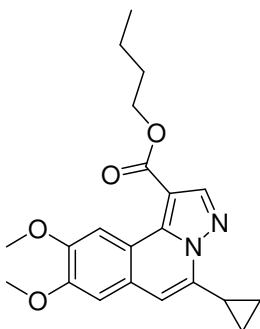

Butyl 5-cyclopropyl-8,9-dimethoxy*H*-pyrazolo[5,1-*a*]isoquinoline-1-carboxylate (**3u**)

$^1\text{H}$  NMR (400 MHz,  $\text{CDCl}_3$ )  $\delta$  0.86–0.91 (m, 2H), 1.01 (t,  $J = 7.3$  Hz, 3H), 1.17–1.20 (m, 2H), 1.51–1.53 (m, 2H), 1.80–1.82 (m, 2H), 2.64–2.70 (m, 1H), 4.01 (s, 3H), 4.12 (s, 3H), 4.35 (t,  $J = 7.3$  Hz, 2H), 6.75 (s, 1H), 7.02 (s, 1H), 8.50 (s, 1H), 9.54 (s, 1H);  $^{13}\text{C}$  NMR (100 MHz,  $\text{CDCl}_3$ )  $\delta$  6.9, 11.6, 13.8, 19.3, 30.9, 55.8, 56.3, 64.1, 106.1, 106.3, 108.6, 109.0, 117.8, 126.2, 138.89, 138.91, 145.0, 148.8, 150.7, 164.2; HRMS (ESI) calcd for  $\text{C}_{21}\text{H}_{24}\text{N}_2\text{O}_4$ : 391.1634 ( $\text{M} + \text{Na}^+$ ), found: 391.1629.

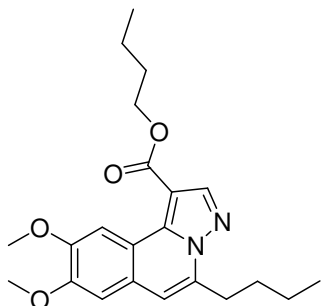

Butyl 5-butyl-8,9-dimethoxy*H*-pyrazolo[5,1-*a*]isoquinoline-1-carboxylate (**3v**)

$^1\text{H}$  NMR (400 MHz,  $\text{CDCl}_3$ )  $\delta$  0.98–1.03 (m, 6H), 1.47–1.55 (m, 4H), 1.76–1.86 (m, 4H), 3.16 (t,  $J = 7.8$  Hz, 2H), 4.02 (s, 3H), 4.12 (s, 3H), 4.35 (t,  $J = 6.4$  Hz, 2H), 6.91 (s, 1H), 7.05 (s, 1H), 8.45 (s, 1H), 9.54 (s, 1H);  $^{13}\text{C}$  NMR (100 MHz,  $\text{CDCl}_3$ )  $\delta$  13.8, 13.9, 19.3, 22.5, 29.1, 30.8, 30.9, 55.8, 56.3, 64.1, 106.0, 106.1, 108.5, 111.4, 117.9, 126.3, 137.7, 138.9, 144.8, 148.8, 150.8, 164.3; HRMS (ESI) calcd for  $\text{C}_{22}\text{H}_{28}\text{N}_2\text{O}_4$ : 407.1947 ( $\text{M} + \text{Na}^+$ ), found: 407.1942.

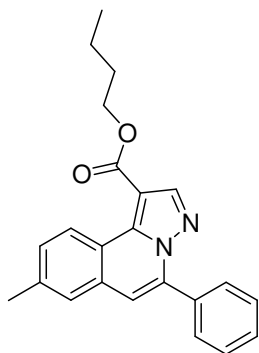

Butyl 8-methyl-5-phenyl*H*-pyrazolo[5,1-*a*]isoquinoline-1-carboxylate (**3w**)

$^1\text{H}$  NMR (400 MHz,  $\text{CDCl}_3$ )  $\delta$  1.00 (t,  $J = 7.3$  Hz, 3H), 1.50–1.52 (m, 2H), 1.80–1.82 (m, 2H), 2.51 (s, 3H), 4.37 (t,  $J = 6.4$  Hz, 2H), 7.10 (s, 1H), 7.45–7.53 (m, 5H), 7.78 (d,  $J = 7.8$  Hz, 2H), 8.43 (s, 1H), 9.74 (d,  $J = 8.3$  Hz, 1H);  $^{13}\text{C}$  NMR (100 MHz,  $\text{CDCl}_3$ )  $\delta$  13.7, 19.3, 21.6, 30.8, 64.2, 107.4, 114.9, 121.6, 126.5, 127.6, 128.3, 129.2, 129.3, 129.5, 130.9, 133.5, 138.2, 139.5, 139.6, 144.9, 163.9; HRMS (ESI) calcd for  $\text{C}_{23}\text{H}_{22}\text{N}_2\text{O}_2$ : 381.1579 ( $\text{M} + \text{Na}^+$ ), found: 381.1579.

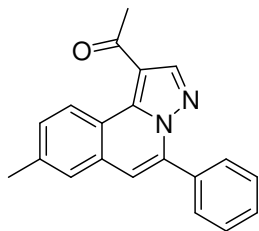

1-(8-Methyl-5-phenyl*H*-pyrazolo[5,1-*a*]isoquinolin-1-yl)ethanone (**3x**)

$^1\text{H}$  NMR (400 MHz,  $\text{CDCl}_3$ )  $\delta$  2.54 (s, 3H), 2.70 (s, 3H), 7.19 (s, 1H), 7.49–7.55 (m, 5H), 7.78 (d,  $J = 7.8$  Hz, 2H), 8.41 (s, 1H), 9.85 (d,  $J = 8.7$  Hz, 1H);  $^{13}\text{C}$  NMR (100 MHz,  $\text{CDCl}_3$ )  $\delta$  21.7, 29.6, 115.8, 116.7, 121.9, 126.5, 127.9, 128.4, 129.3, 129.4, 129.6, 131.2, 133.5, 138.0, 138.9, 140.2, 145.5, 191.9; HRMS (ESI) calcd for  $\text{C}_{20}\text{H}_{16}\text{N}_2\text{O}$ : 323.1160 ( $\text{M} + \text{Na}^+$ ), found: 323.1157.

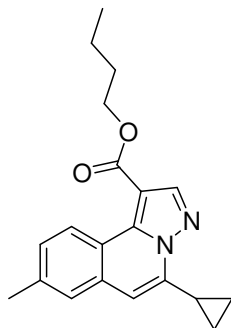

Butyl 5-cyclopropyl-8-methyl*H*-pyrazolo[5,1-*a*]isoquinoline-1-carboxylate (**3y**)

$^1\text{H}$  NMR (400 MHz,  $\text{CDCl}_3$ )  $\delta$  0.87–0.91 (m, 2H), 1.01 (t,  $J = 7.3$  Hz, 3H), 1.17–1.22 (m, 2H), 1.51–1.53 (m, 2H), 1.80–1.82 (m, 2H), 2.50 (s, 3H), 2.64–2.71 (m, 1H), 4.37 (t,  $J = 6.4$  Hz, 2H), 6.74 (s, 1H), 7.40 (d,  $J = 7.8$  Hz, 1H), 7.43 (s, 1H), 8.50 (s, 1H), 9.67 (d,  $J = 8.3$  Hz, 1H);  $^{13}\text{C}$  NMR (100 MHz,  $\text{CDCl}_3$ )  $\delta$  7.1, 11.6, 13.8, 19.3, 21.6, 30.8, 64.1, 107.4, 109.3, 120.9, 125.9, 127.4, 128.5, 130.9, 139.1, 139.3, 140.5, 144.8, 164.0; HRMS (ESI) calcd for  $\text{C}_{20}\text{H}_{22}\text{N}_2\text{O}_2$ : 345.1579 ( $\text{M} + \text{Na}^+$ ), found: 345.1573.

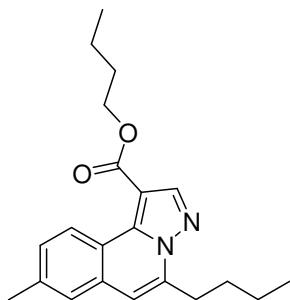

Butyl 5-butyl-8-methyl*H*-pyrazolo[5,1-*a*]isoquinoline-1-carboxylate (**3z**)

$^1\text{H}$  NMR (400 MHz,  $\text{CDCl}_3$ )  $\delta$  0.97–1.03 (m, 6H), 1.46–1.55 (m, 4H), 1.78–1.85 (m, 4H), 2.51 (s, 3H), 3.15 (t,  $J = 7.8$  Hz, 2H), 4.36 (t,  $J = 6.4$  Hz, 2H), 6.89 (s, 1H), 7.41 (d,  $J = 8.3$  Hz, 1H), 7.45 (s, 1H), 8.45 (s, 1H), 9.67 (d,  $J = 8.7$  Hz, 1H);  $^{13}\text{C}$  NMR (100 MHz,  $\text{CDCl}_3$ )  $\delta$  13.8, 13.9, 19.3, 21.6, 22.5, 29.0, 30.88, 30.90, 64.1, 107.3, 111.9, 121.1, 125.8, 127.4, 128.4, 131.0, 139.1, 139.2, 139.3, 144.6, 164.0; HRMS (ESI) calcd for  $\text{C}_{21}\text{H}_{26}\text{N}_2\text{O}_2$ : 361.1892 ( $\text{M} + \text{Na}^+$ ), found: 361.1885.



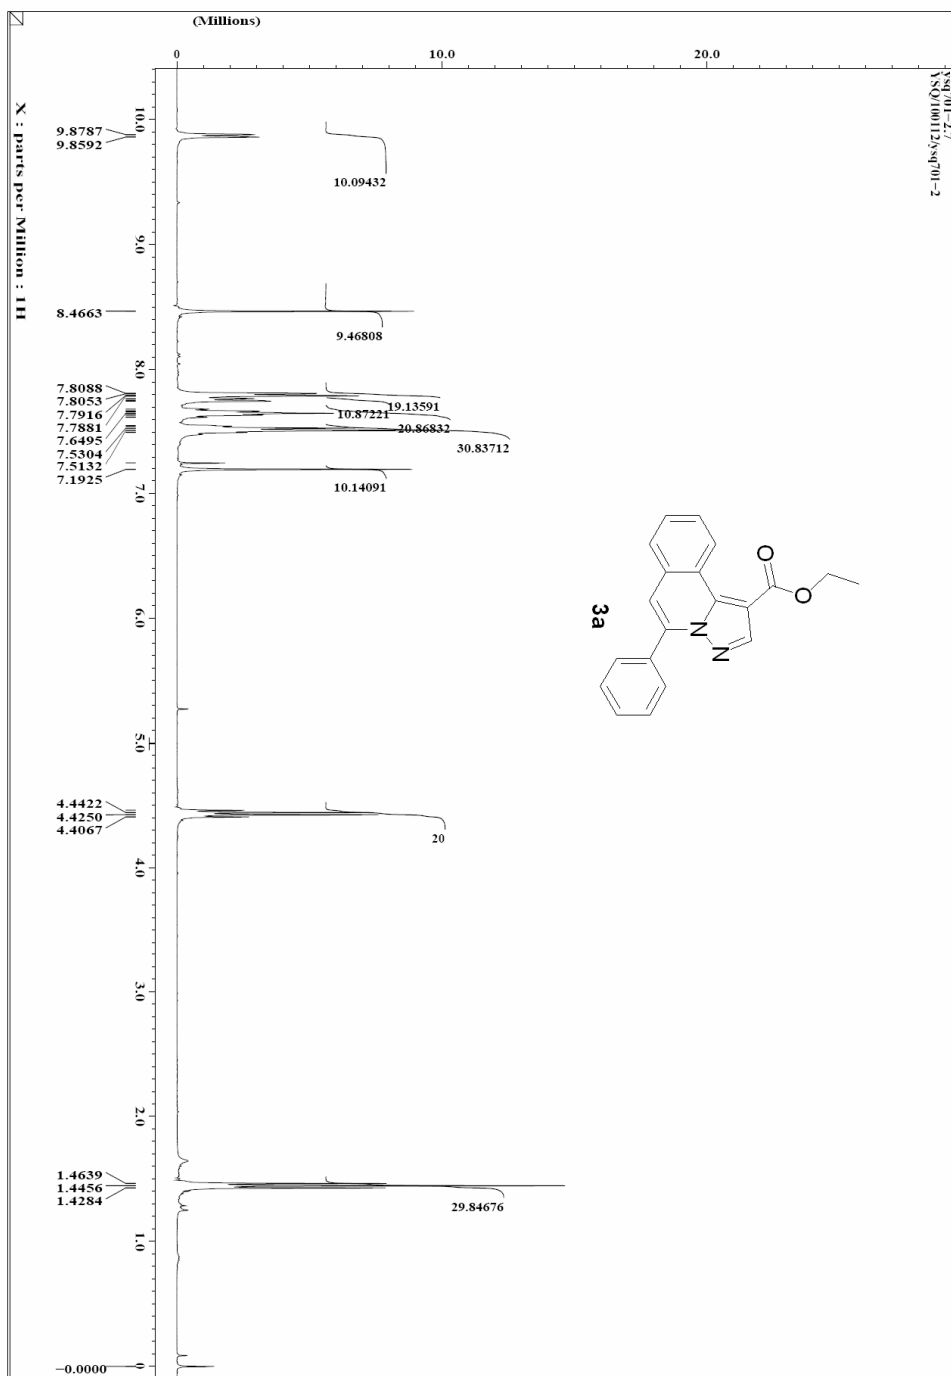

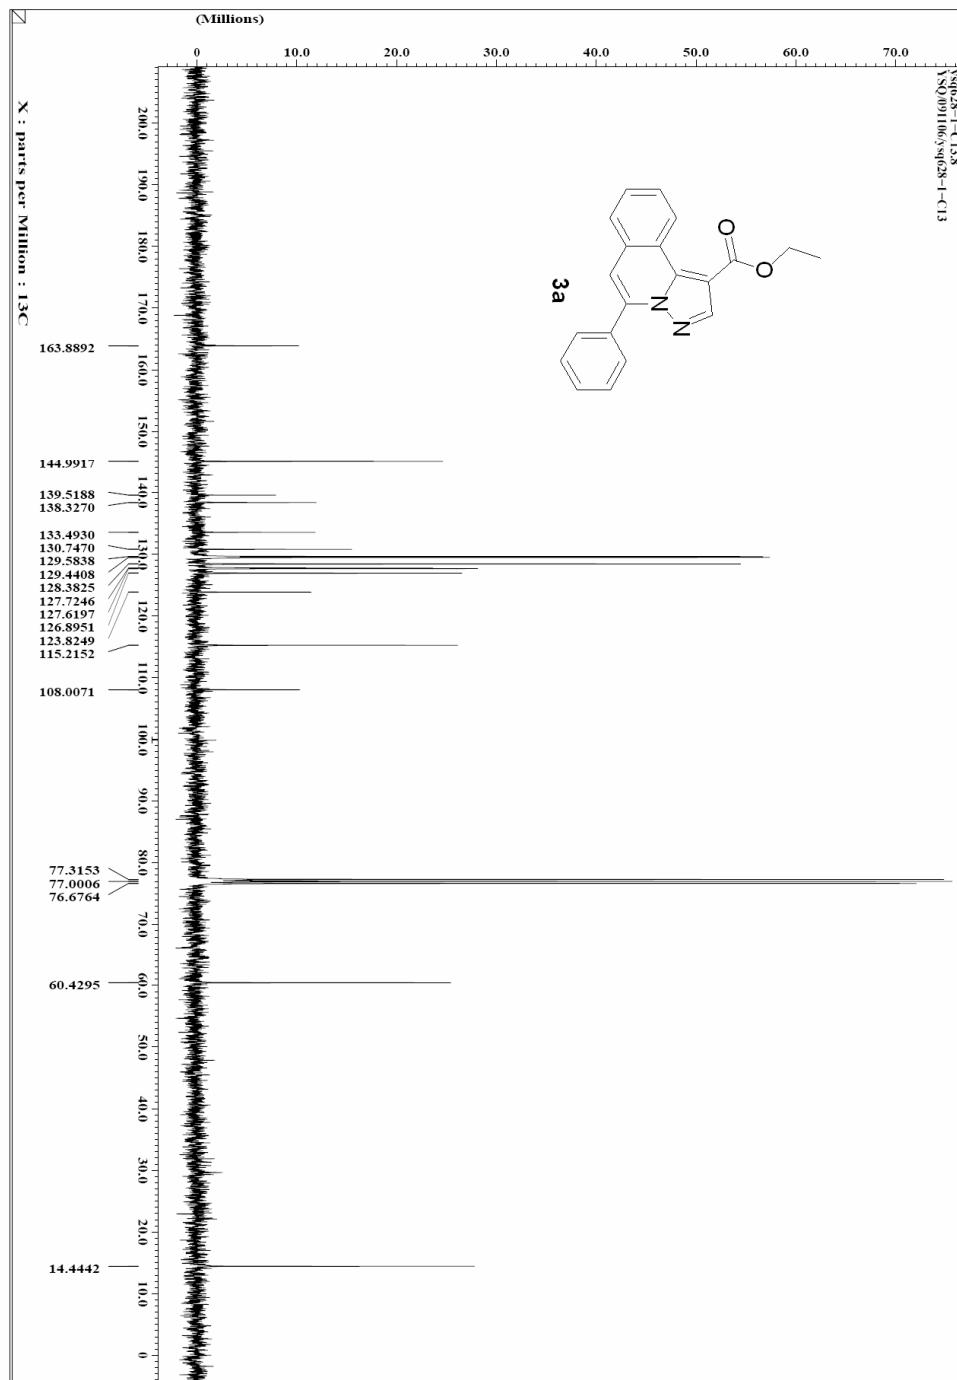

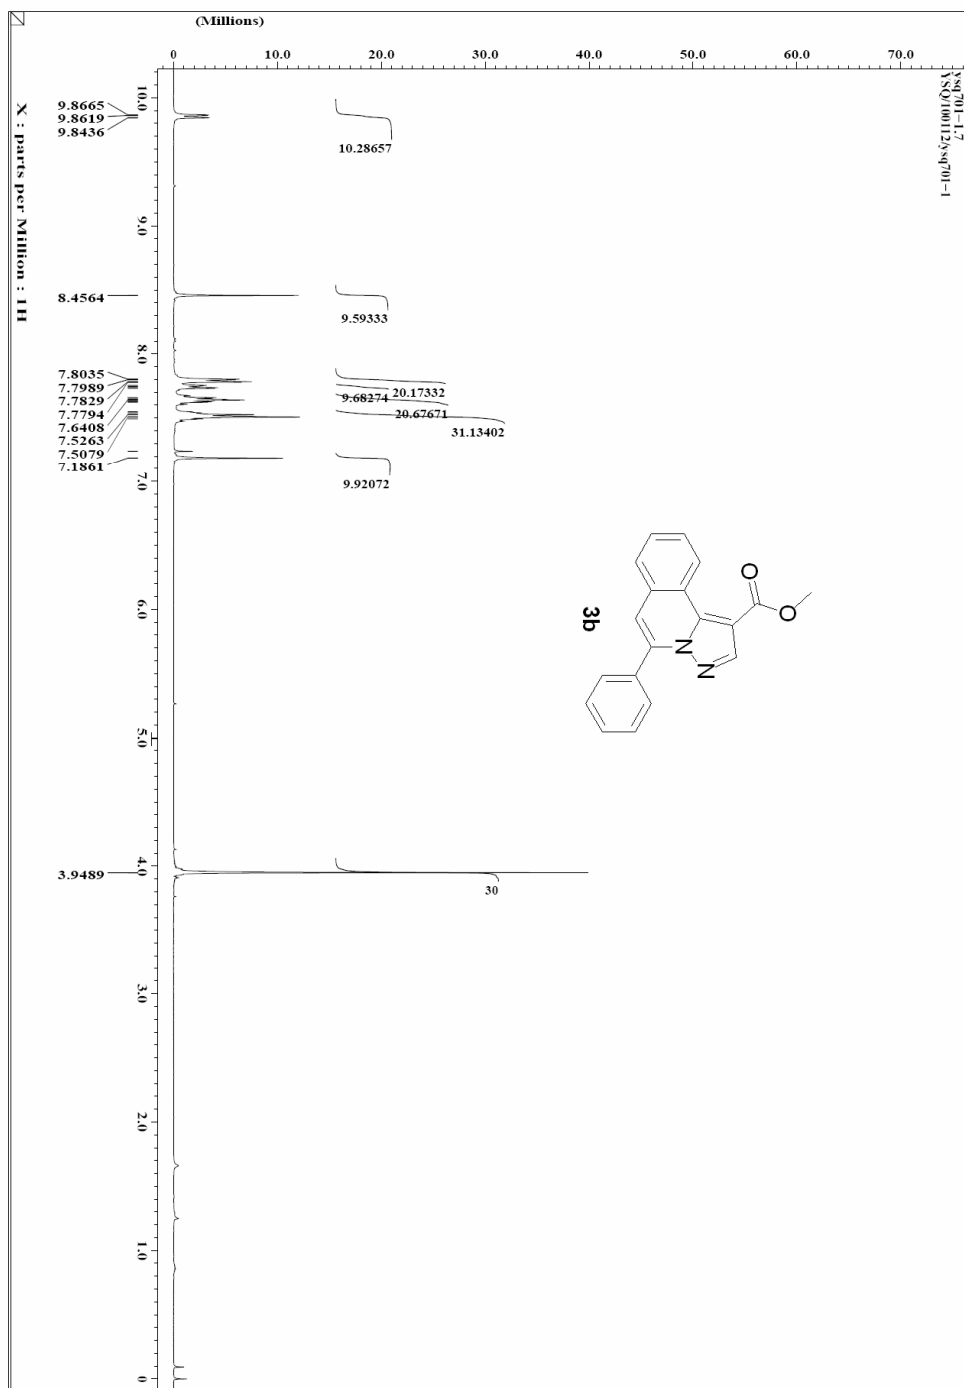

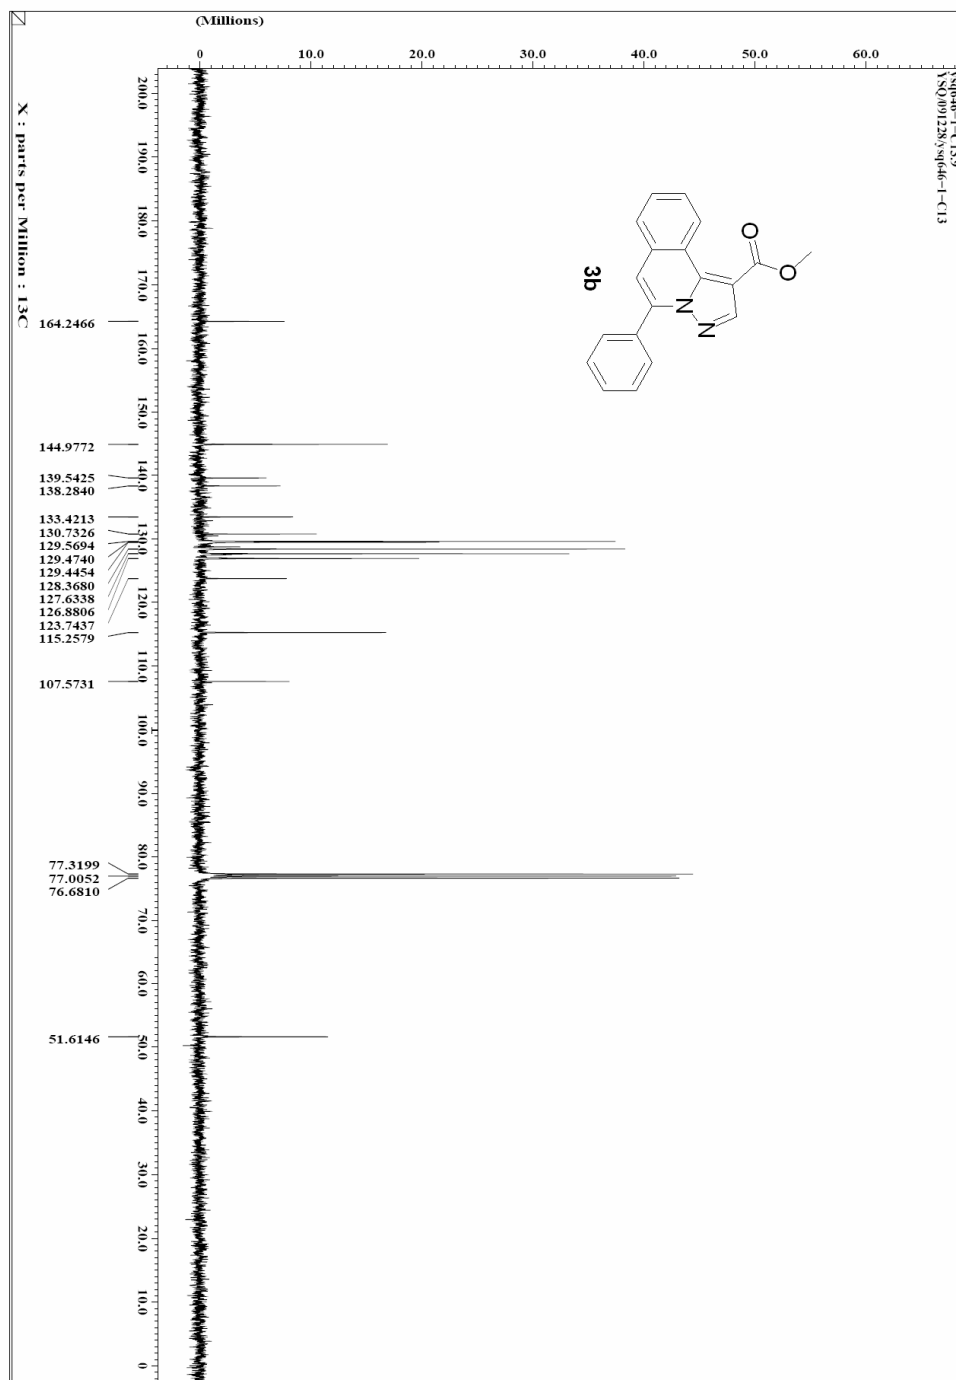

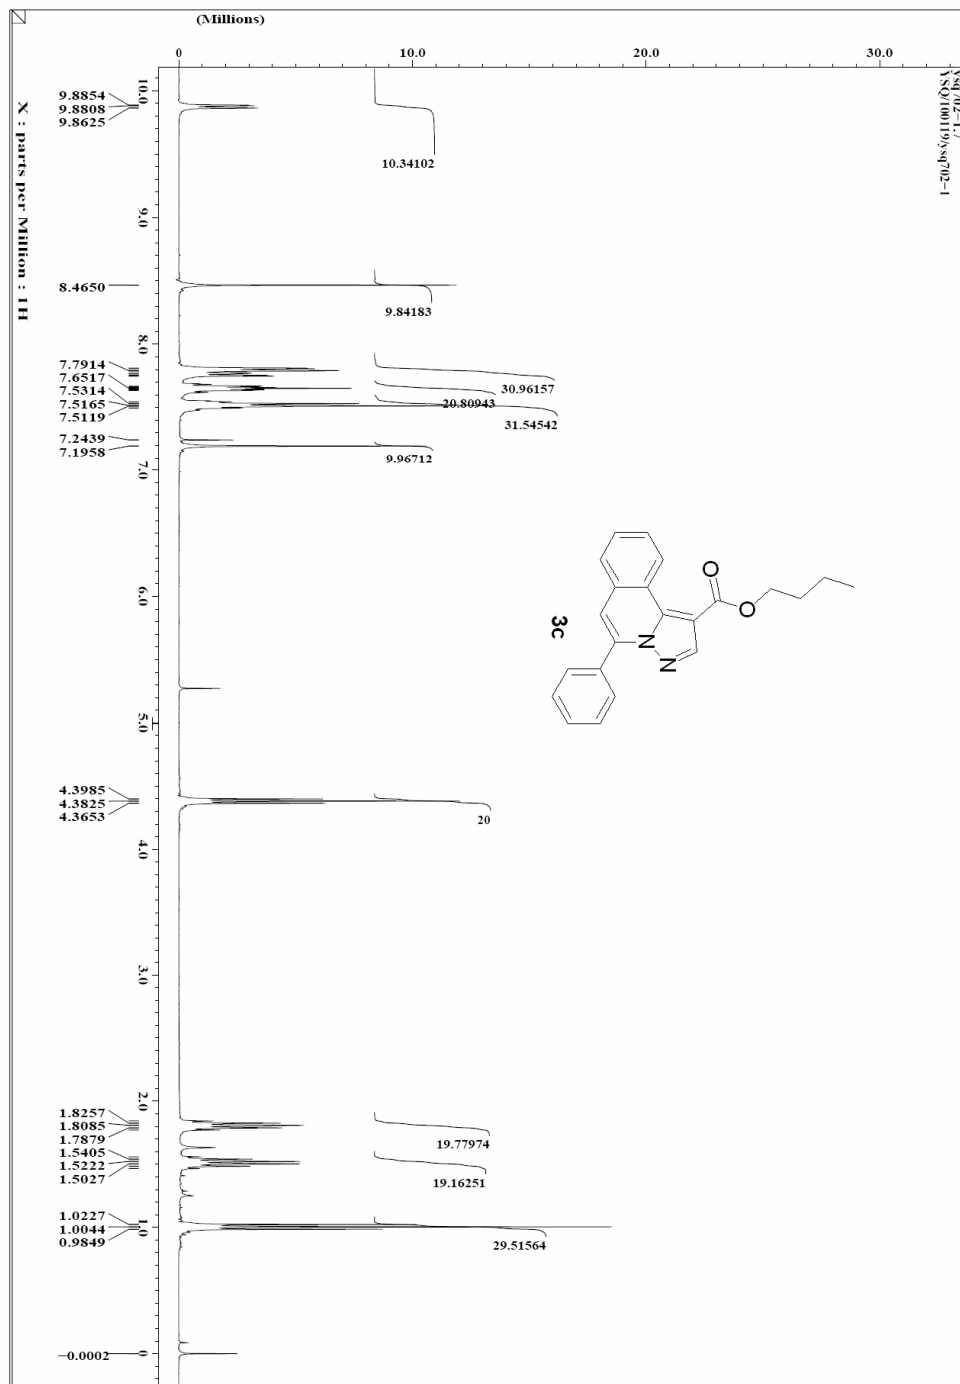

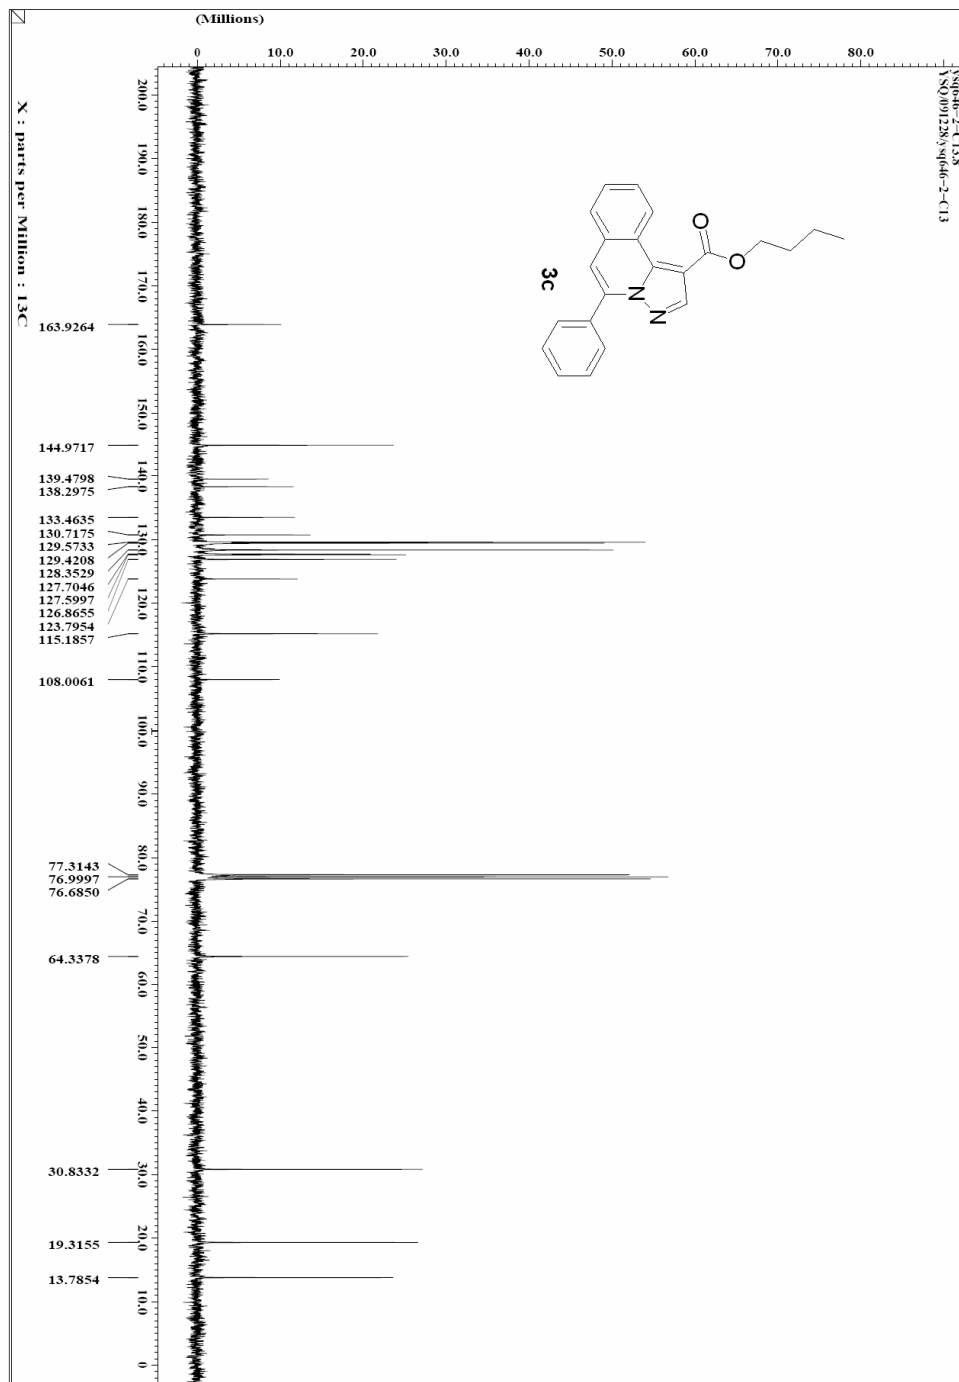

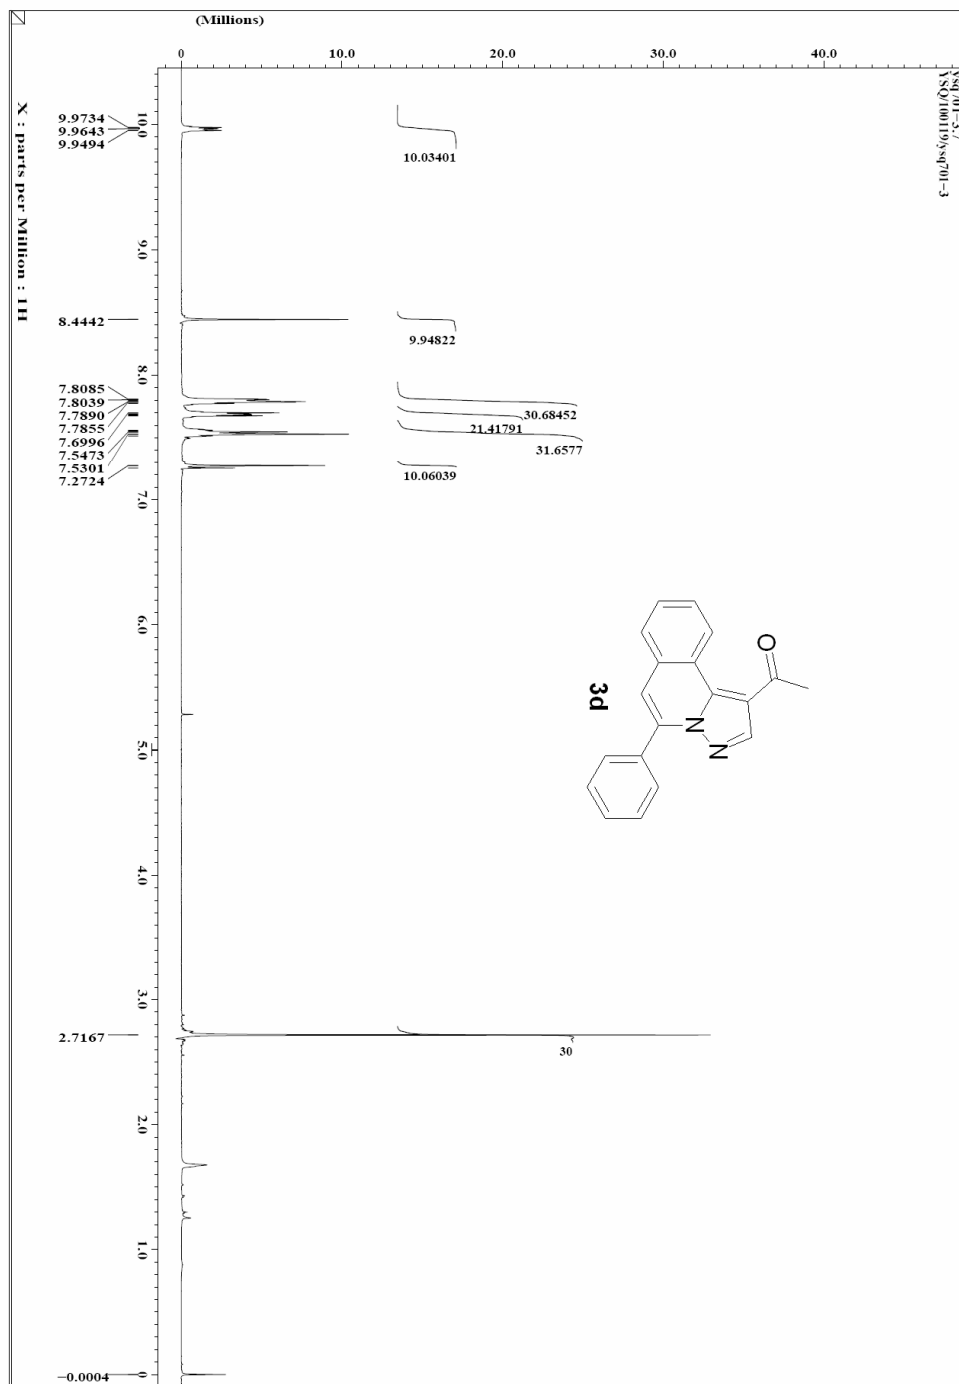

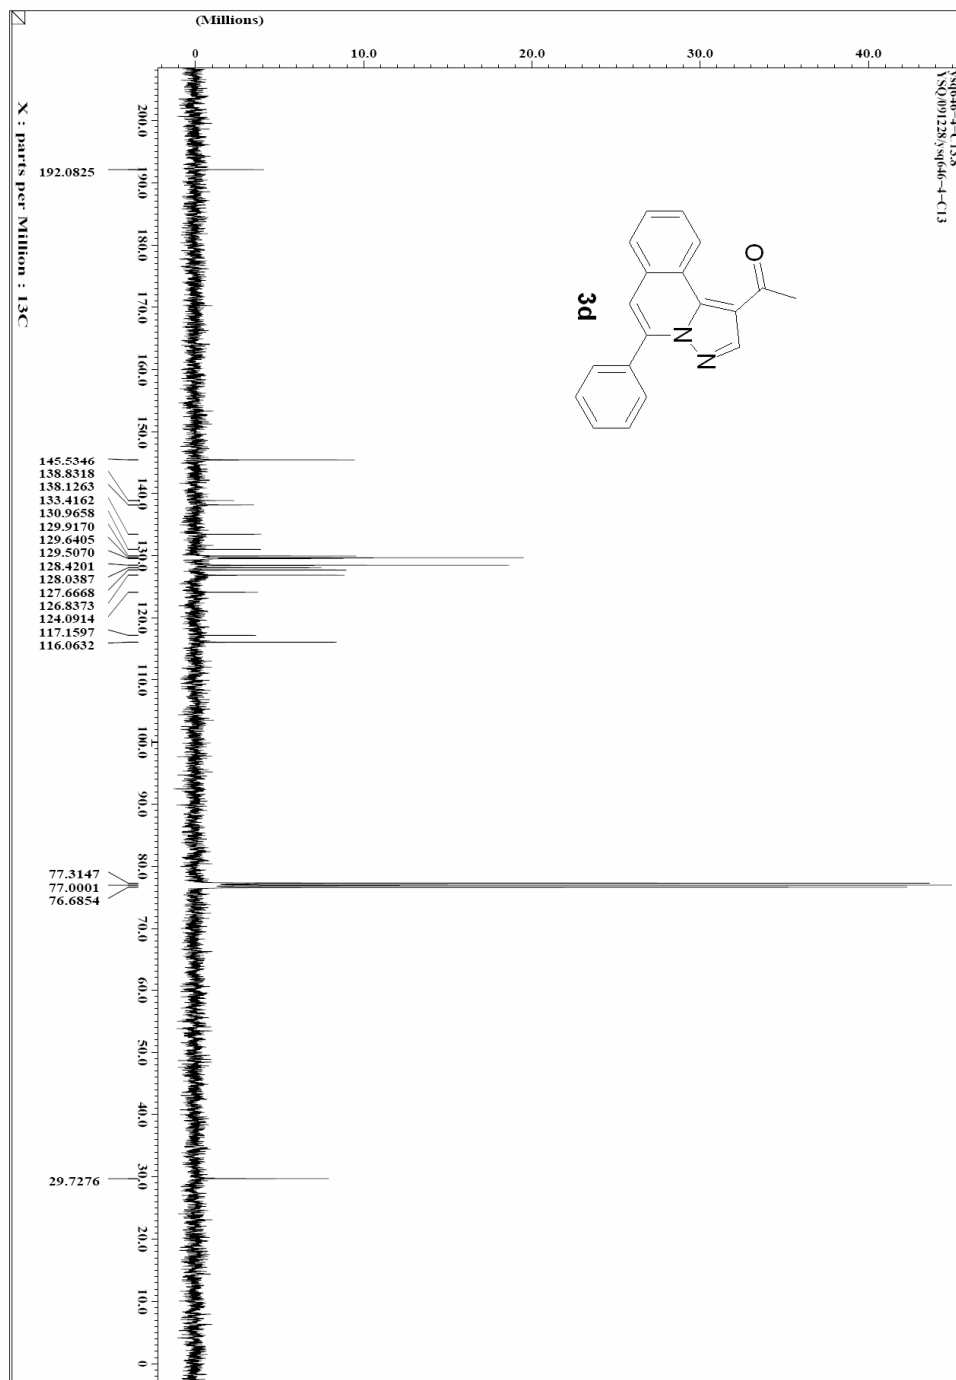



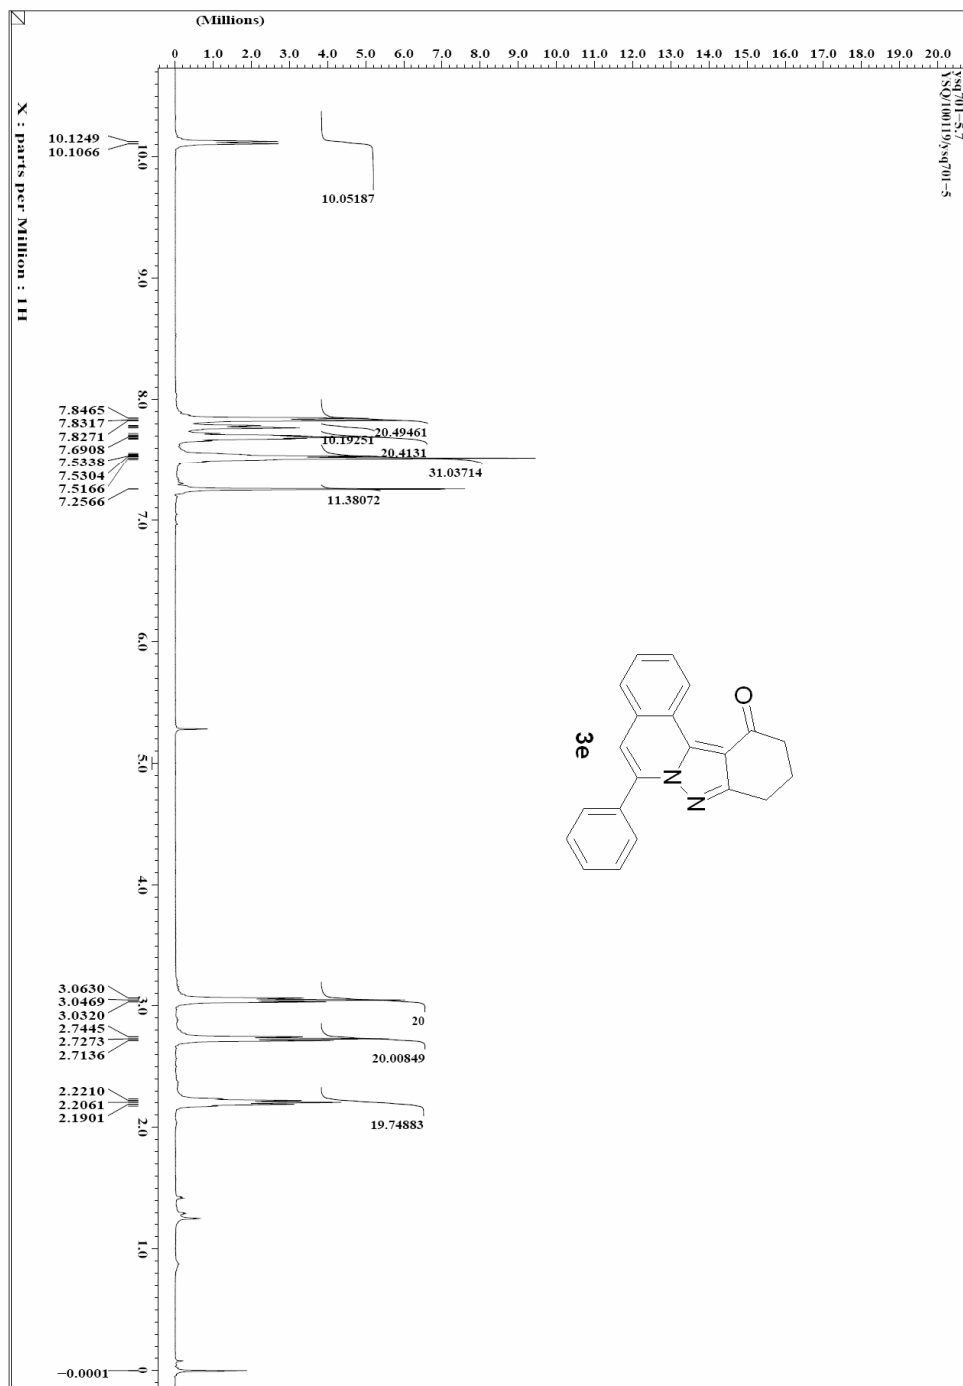

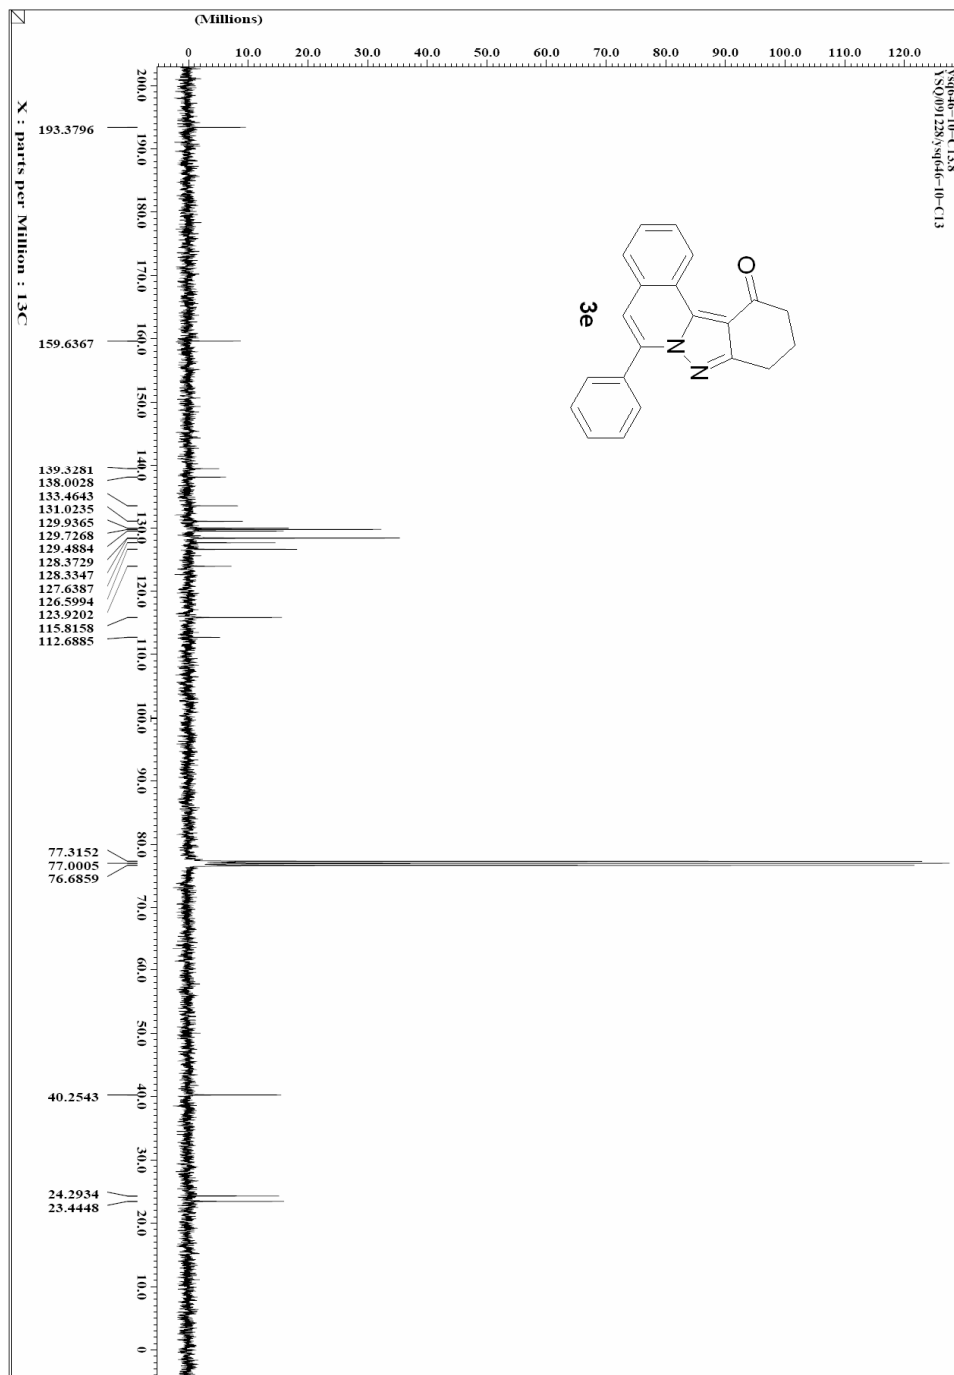

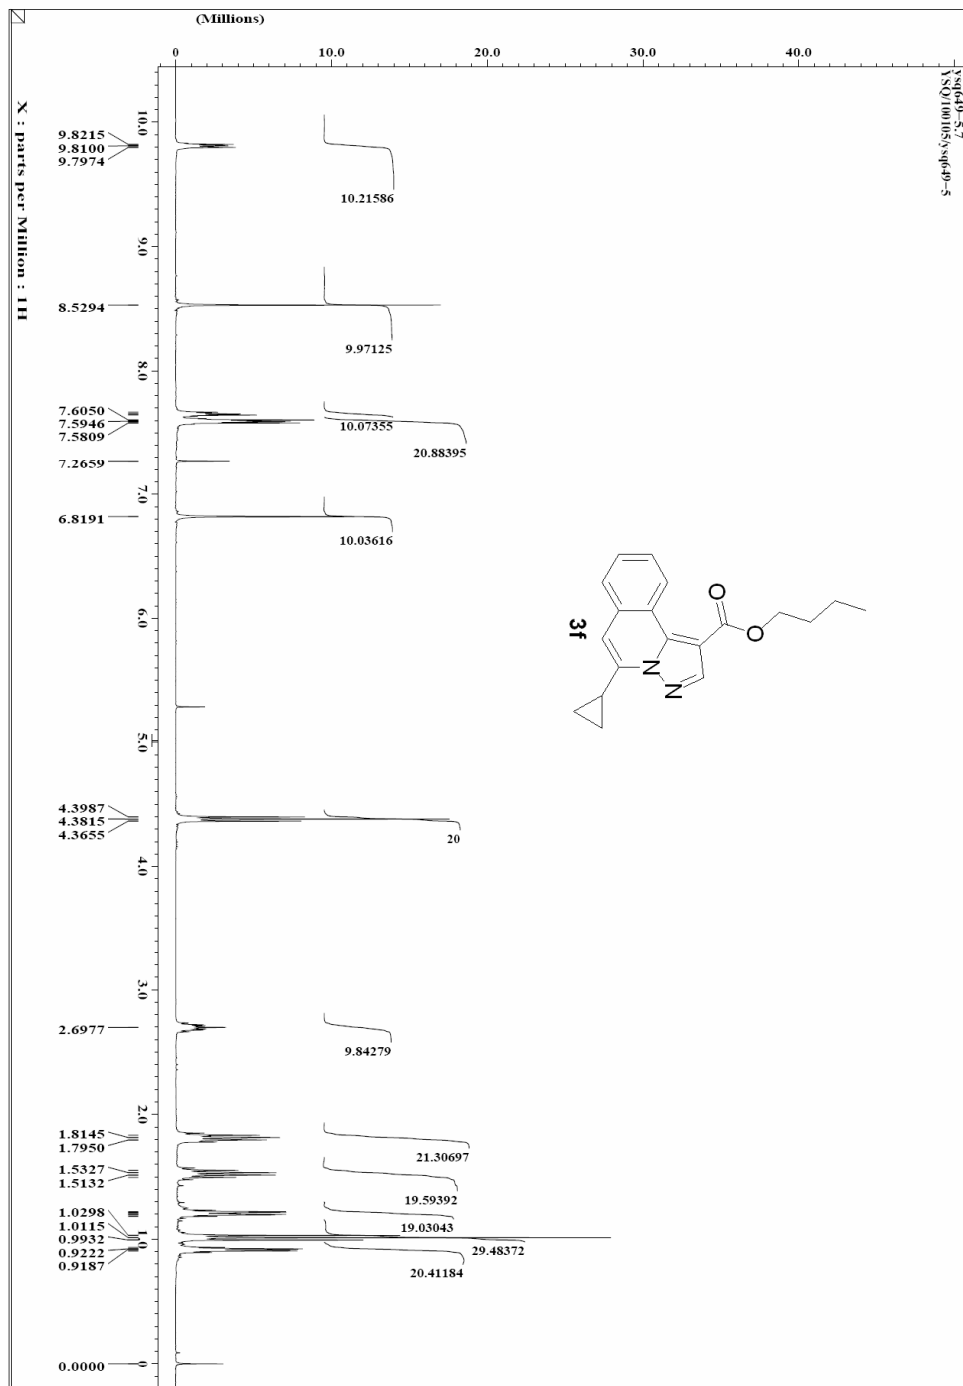

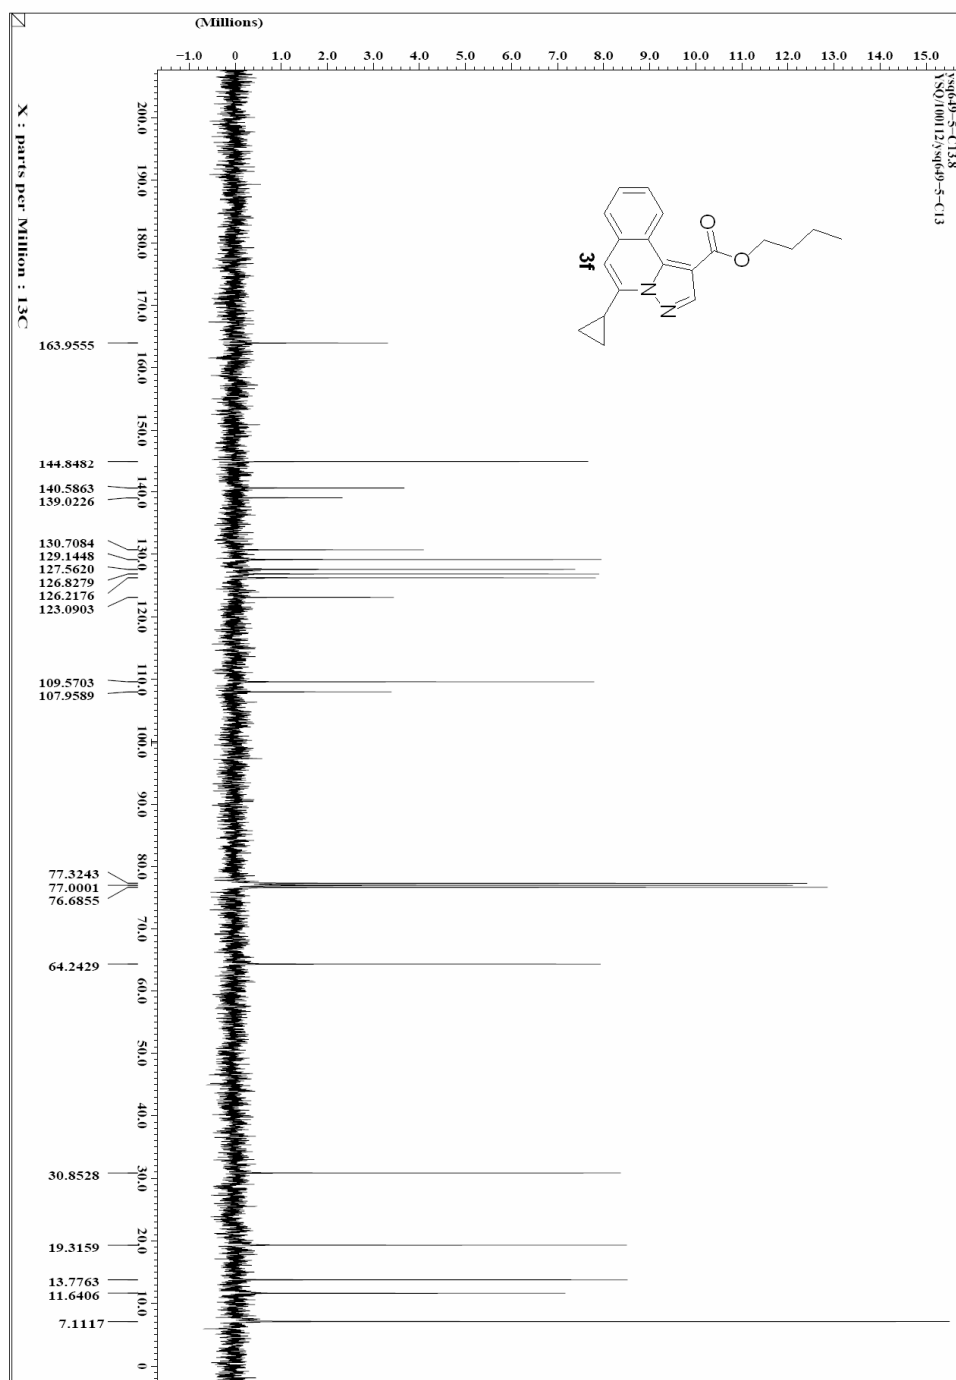

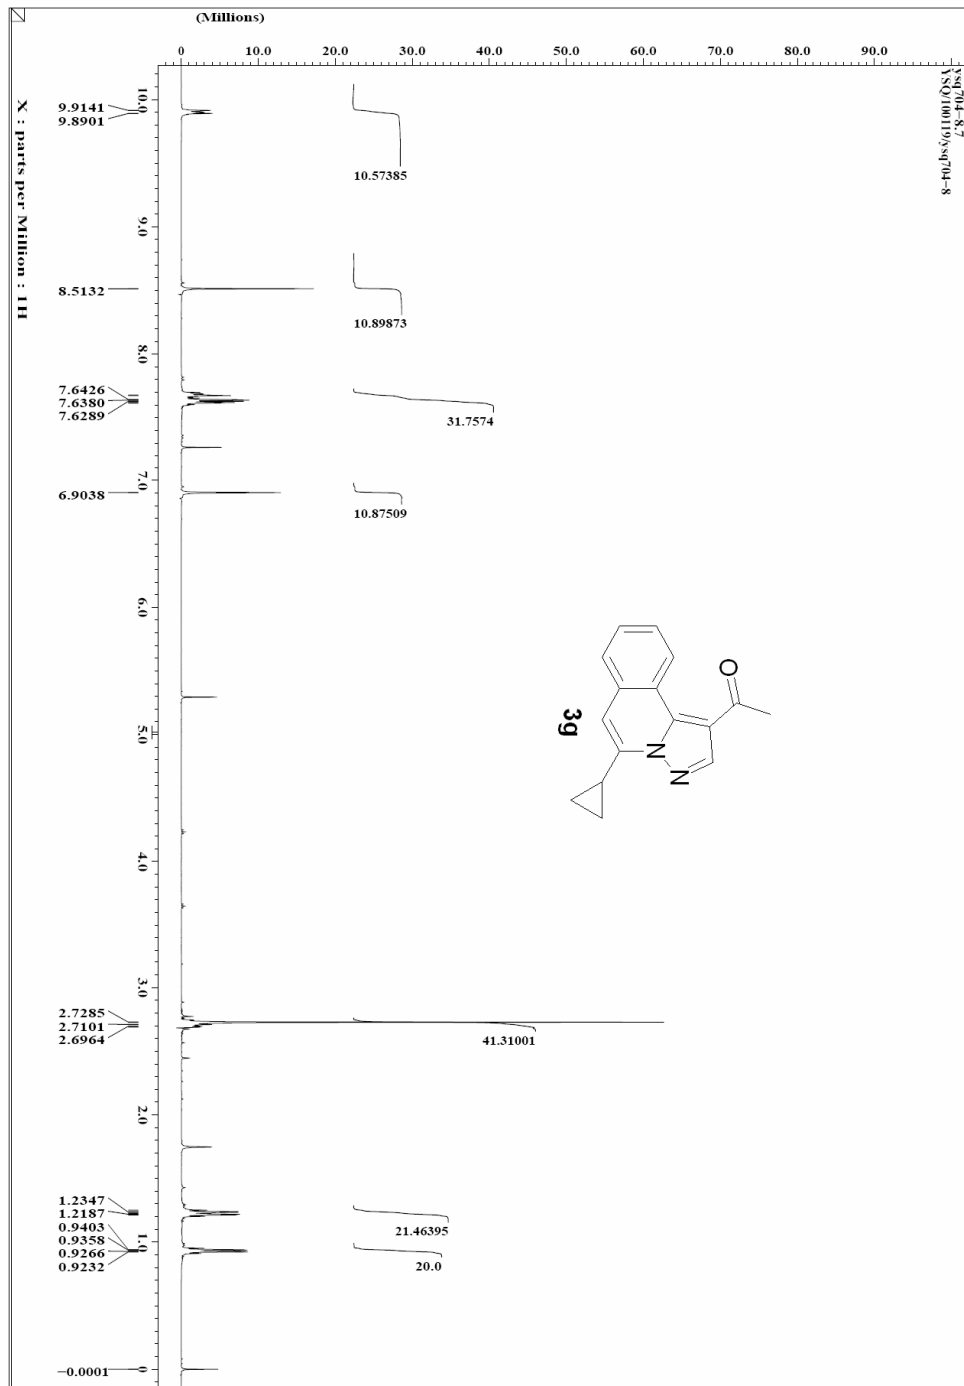

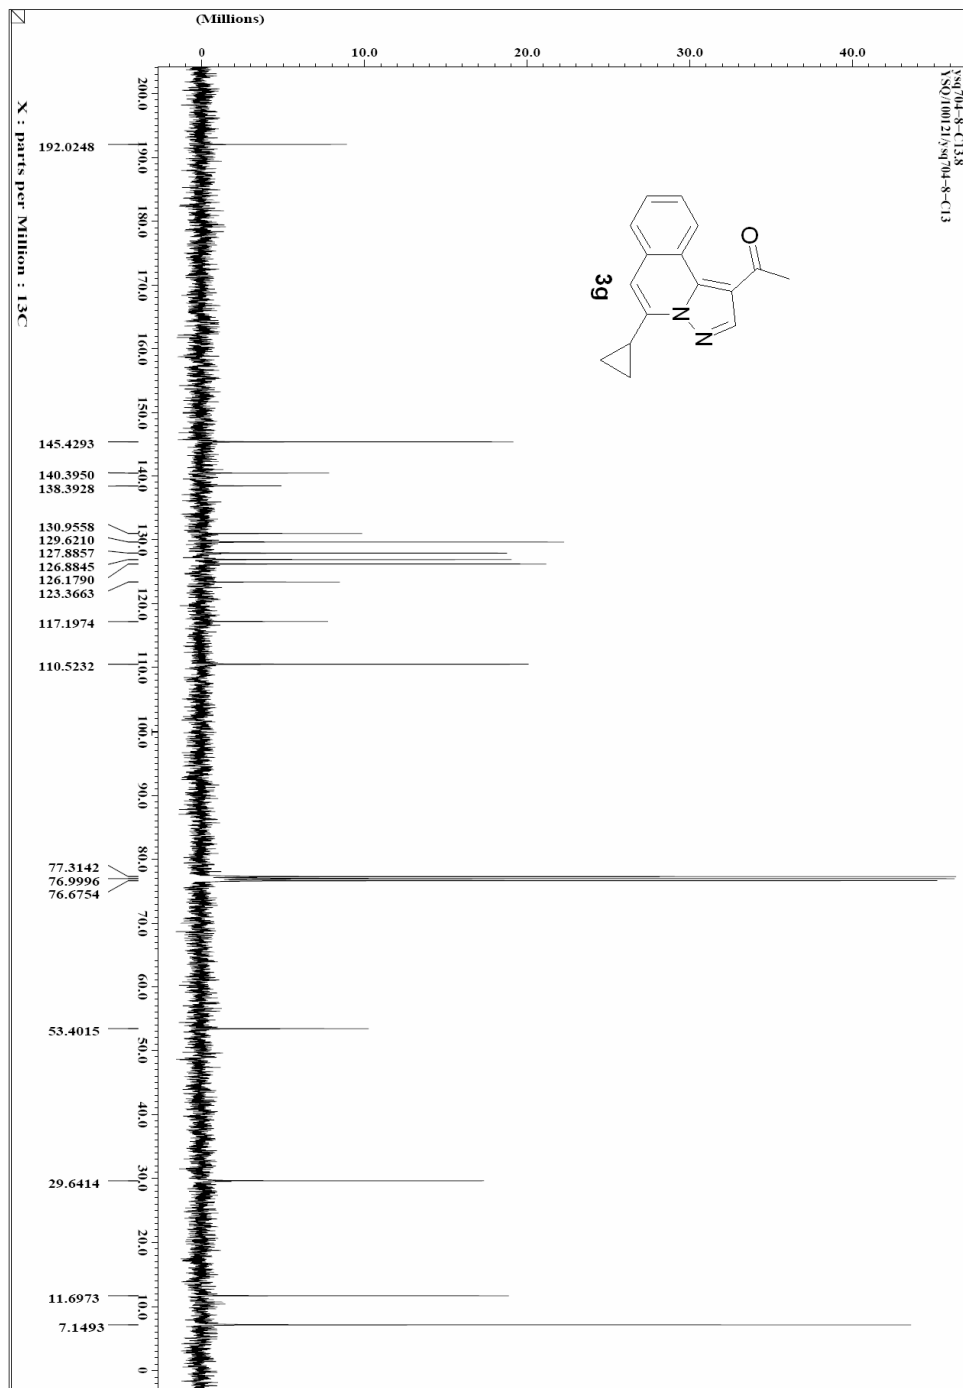

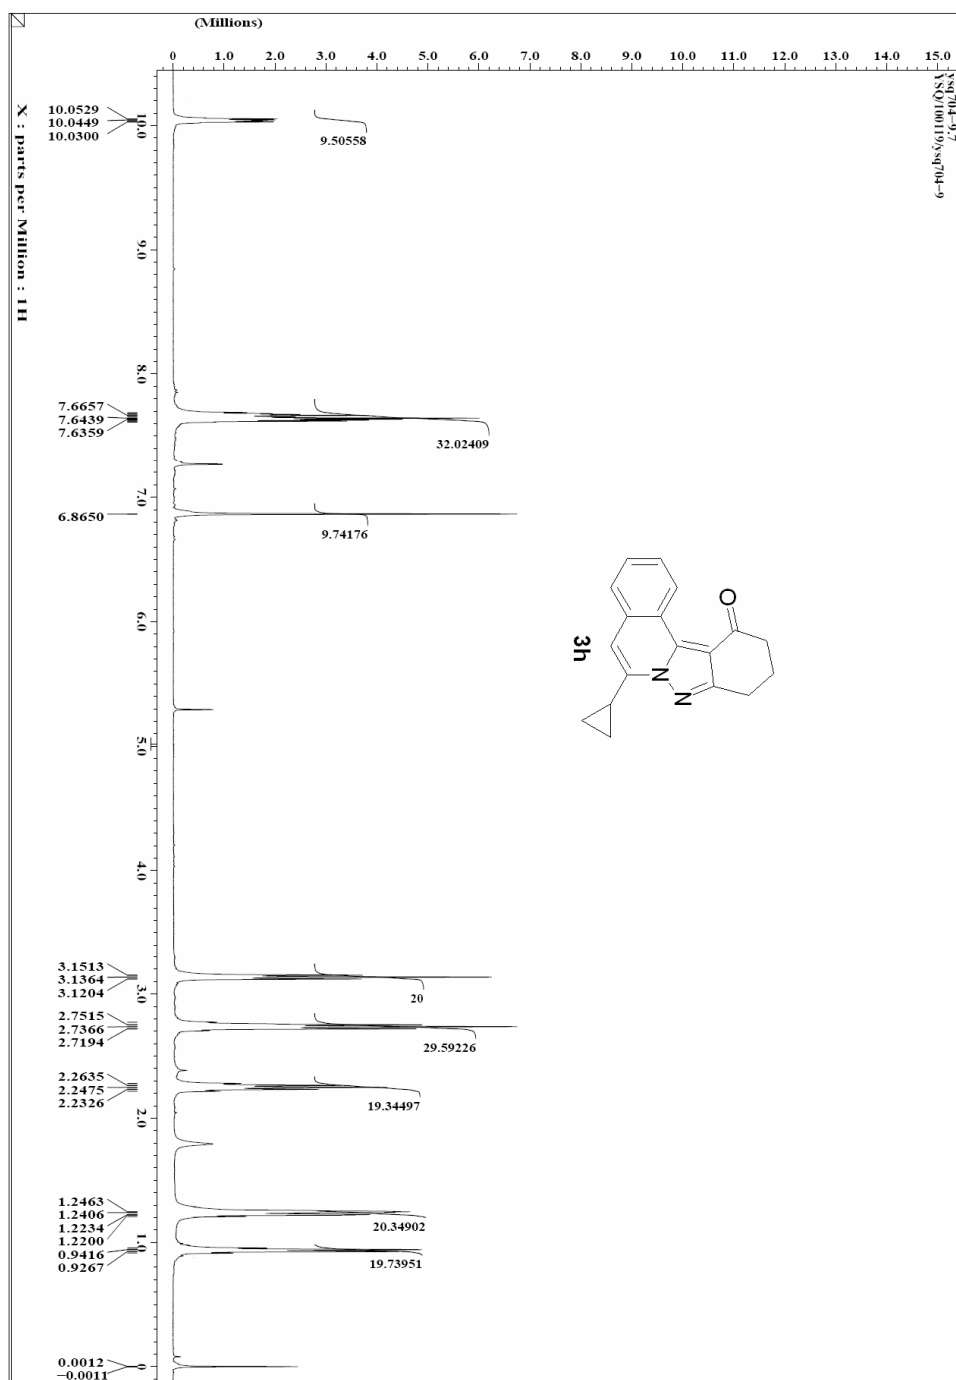

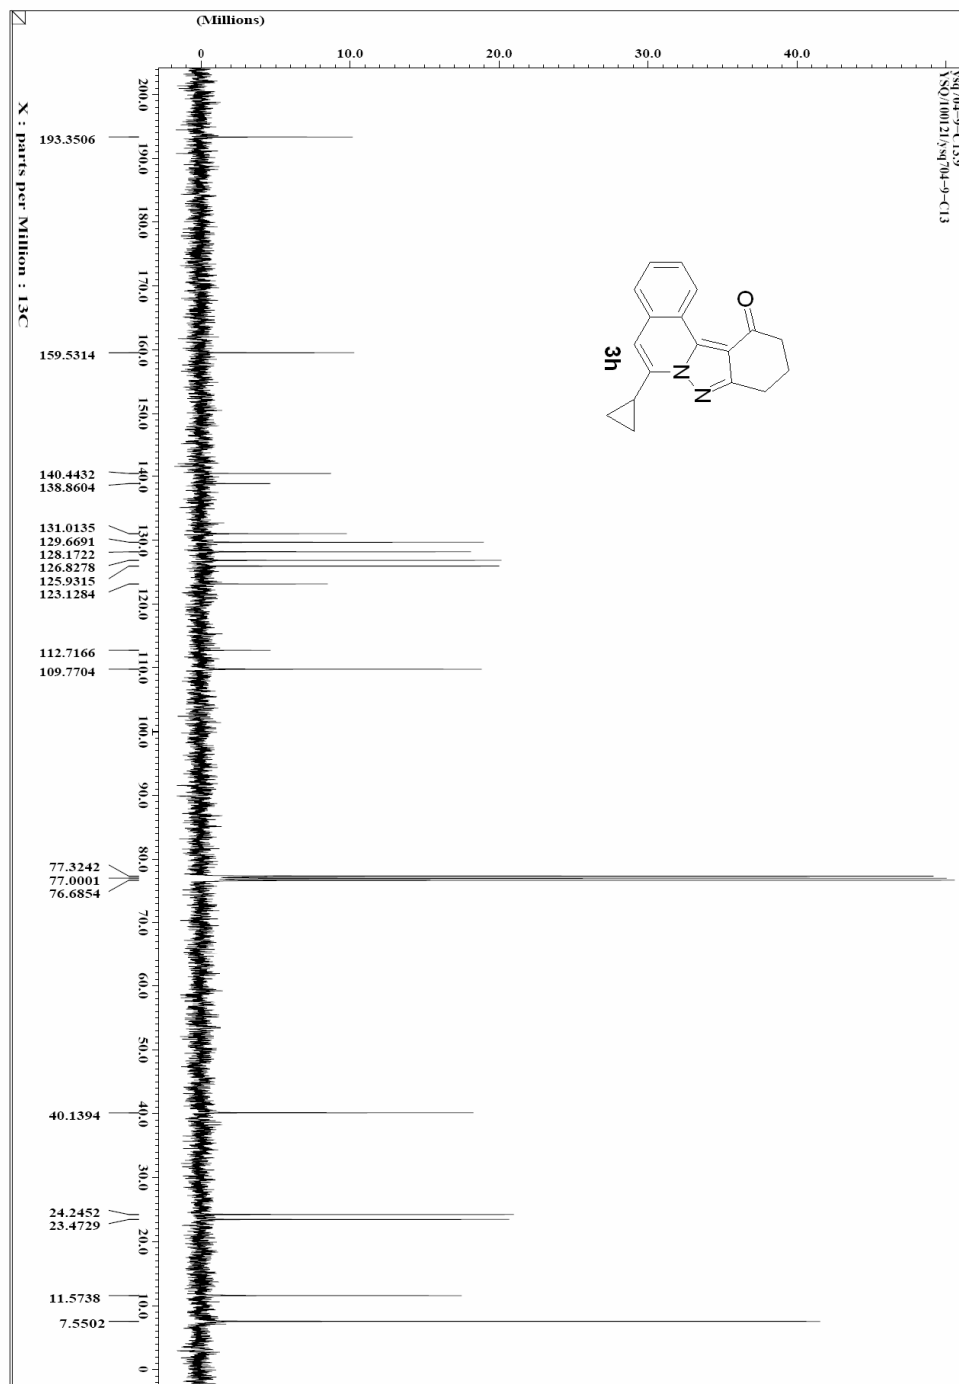



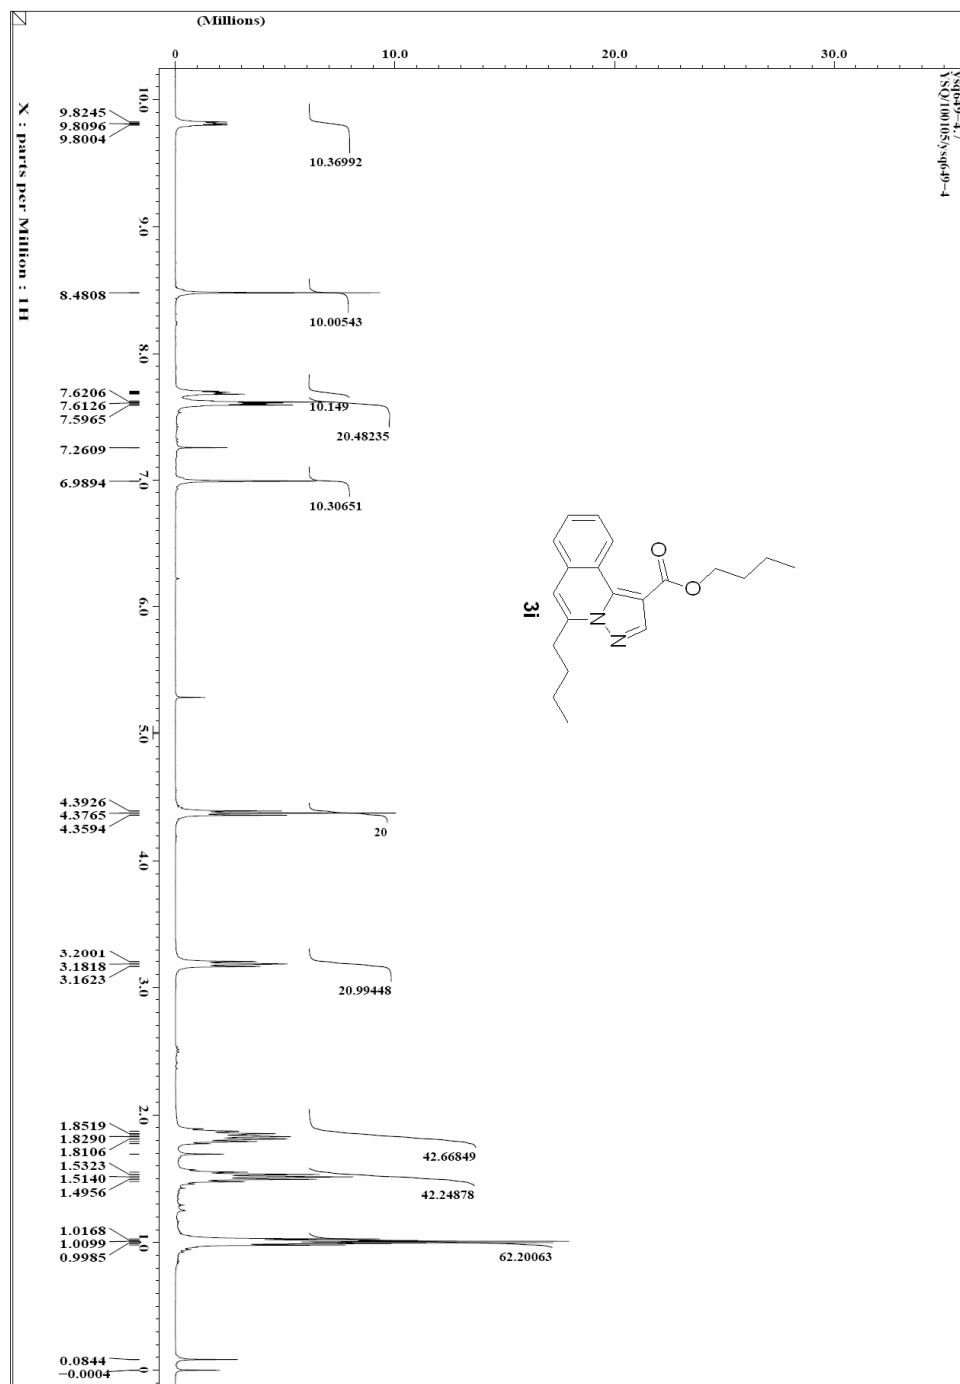

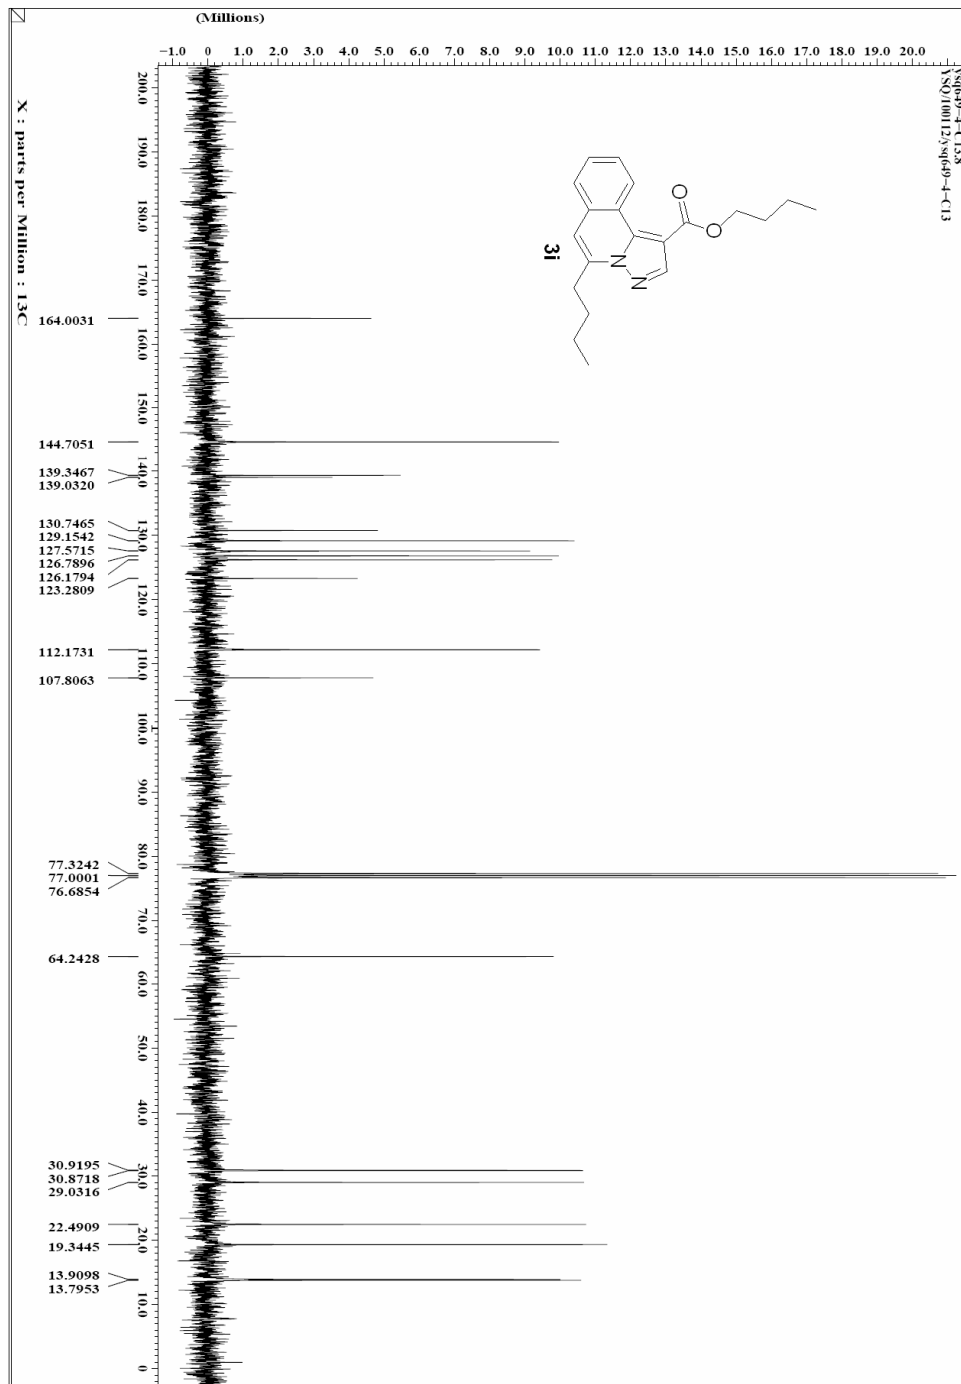

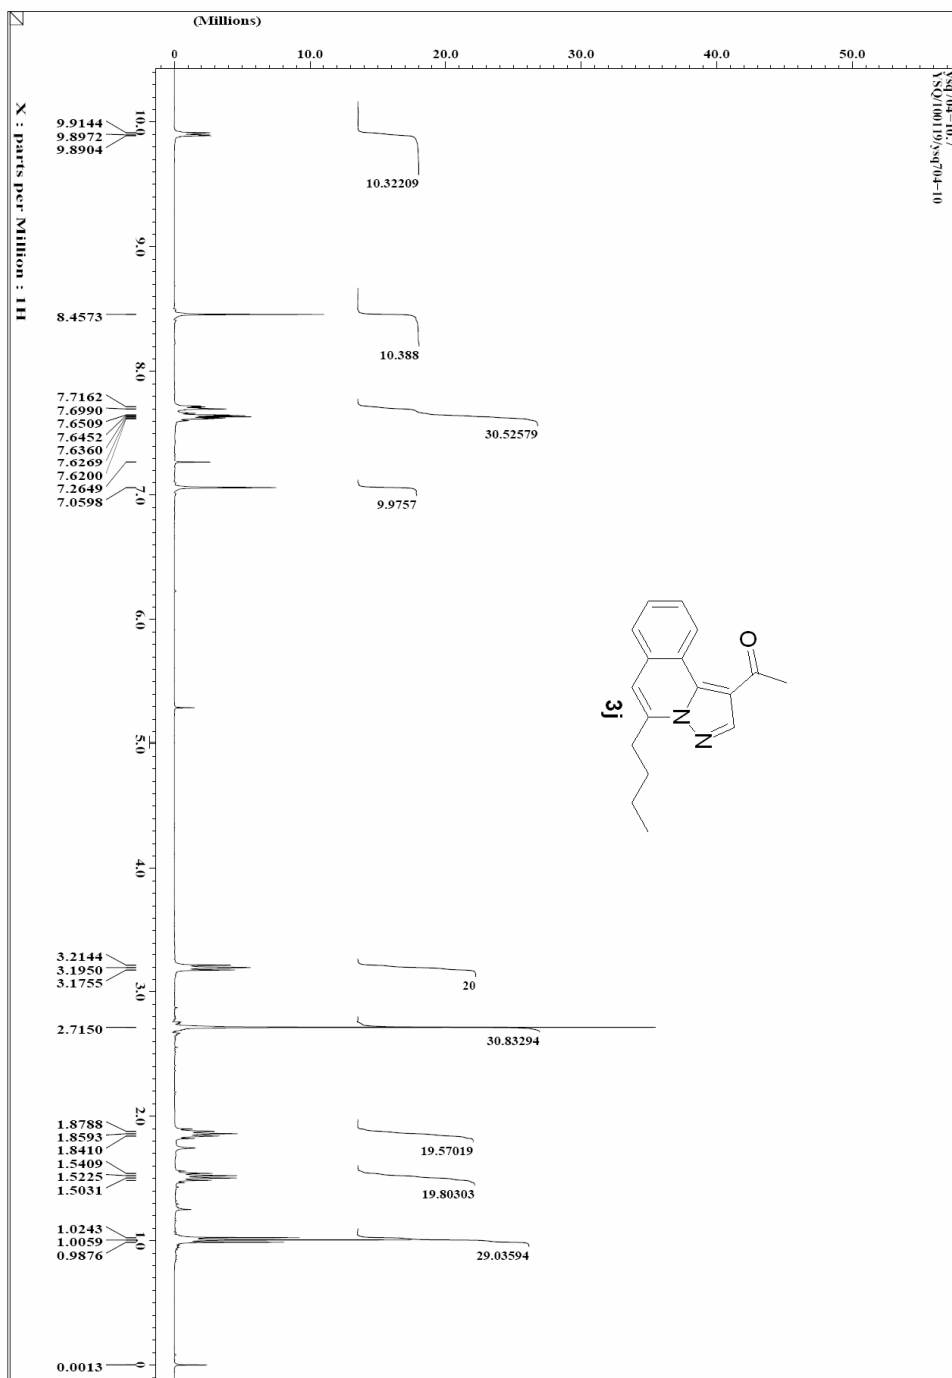

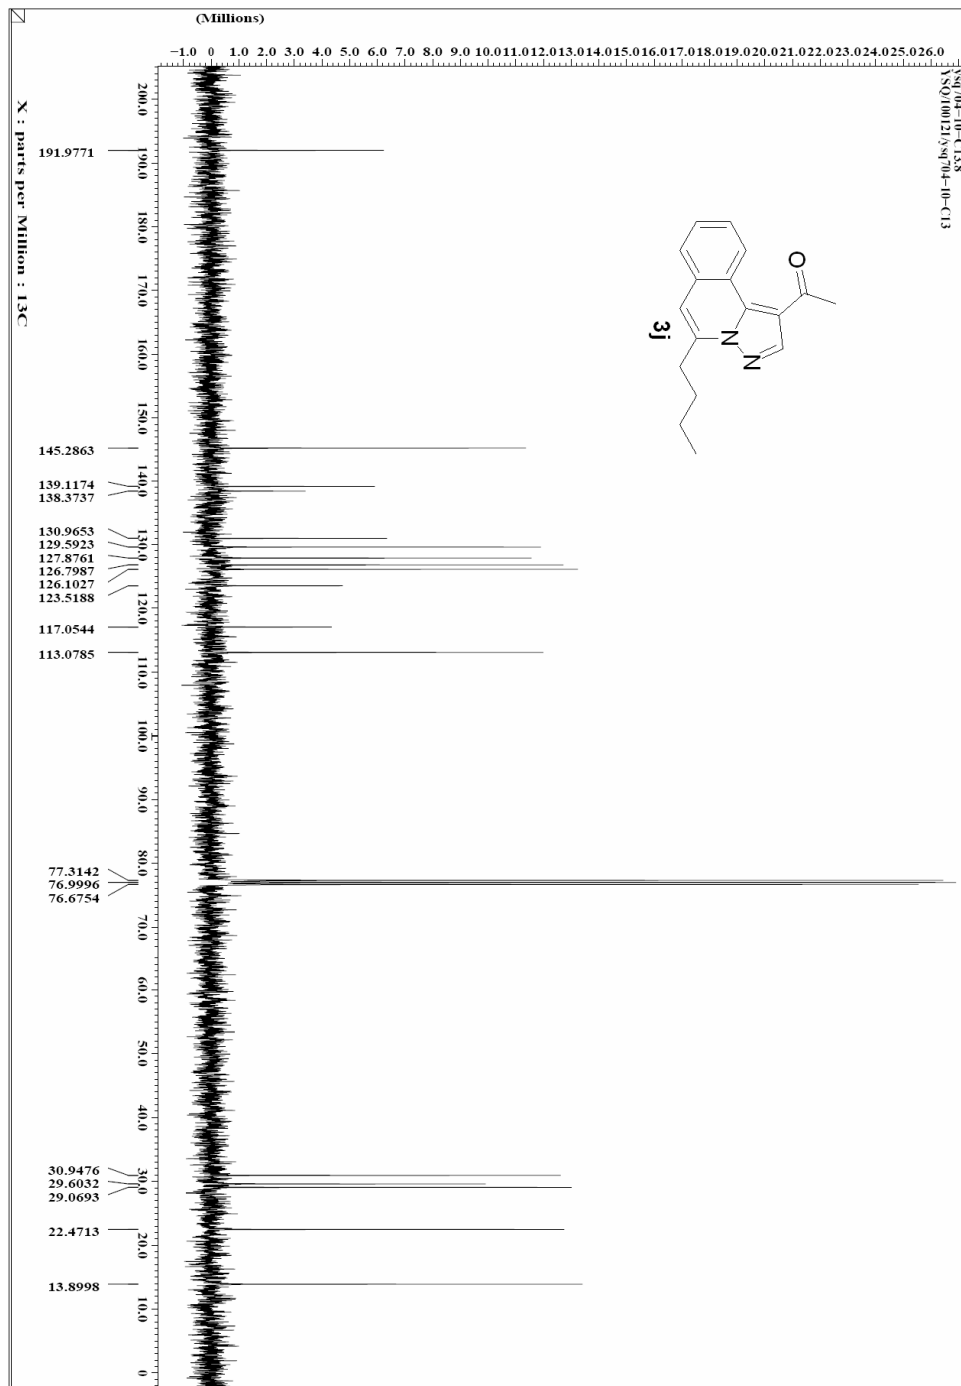

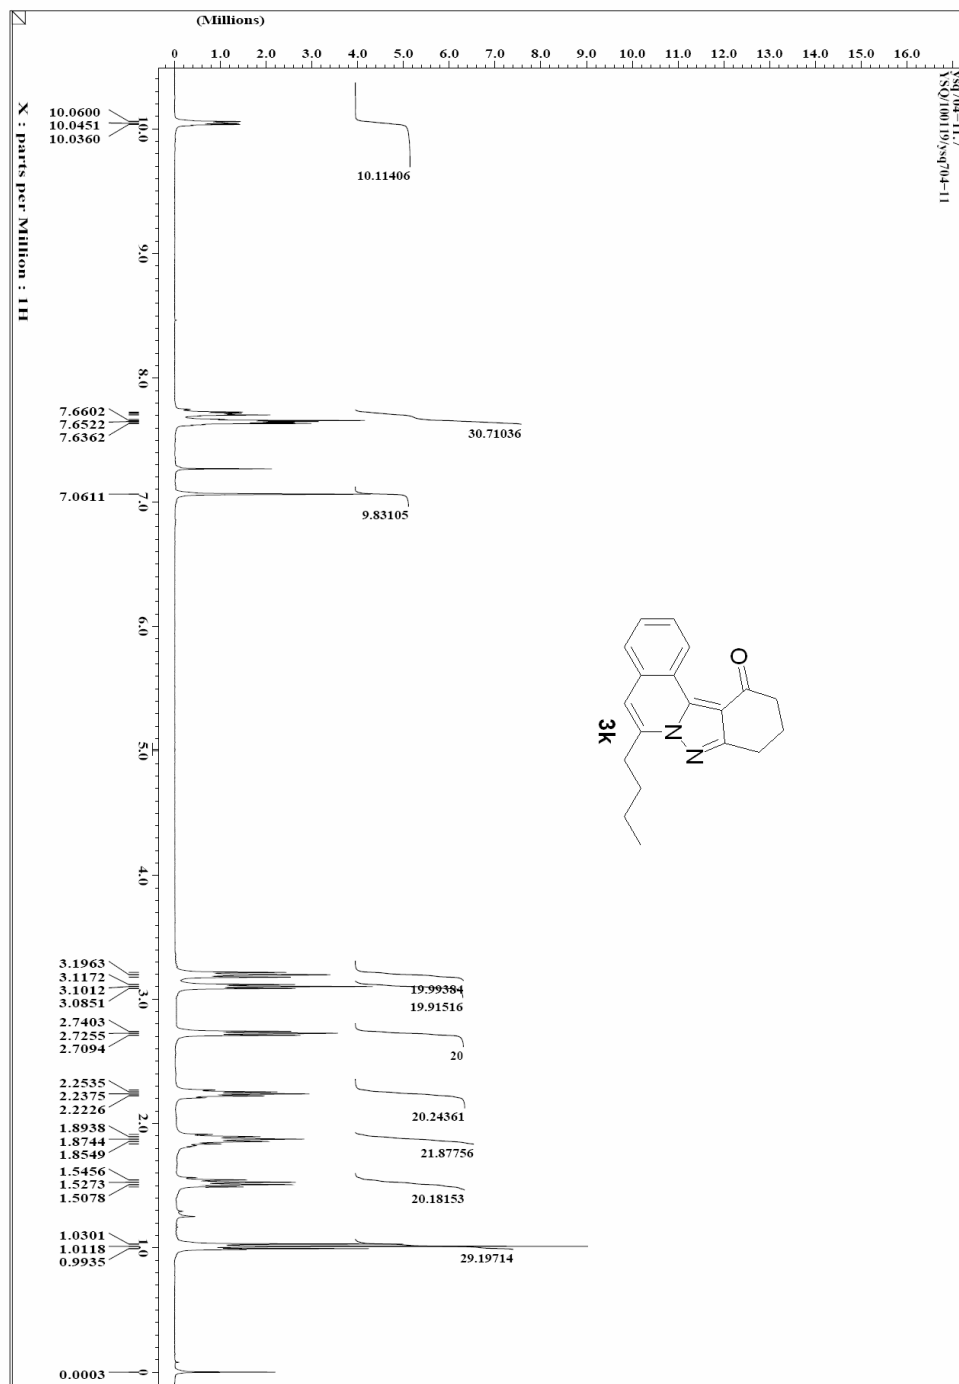

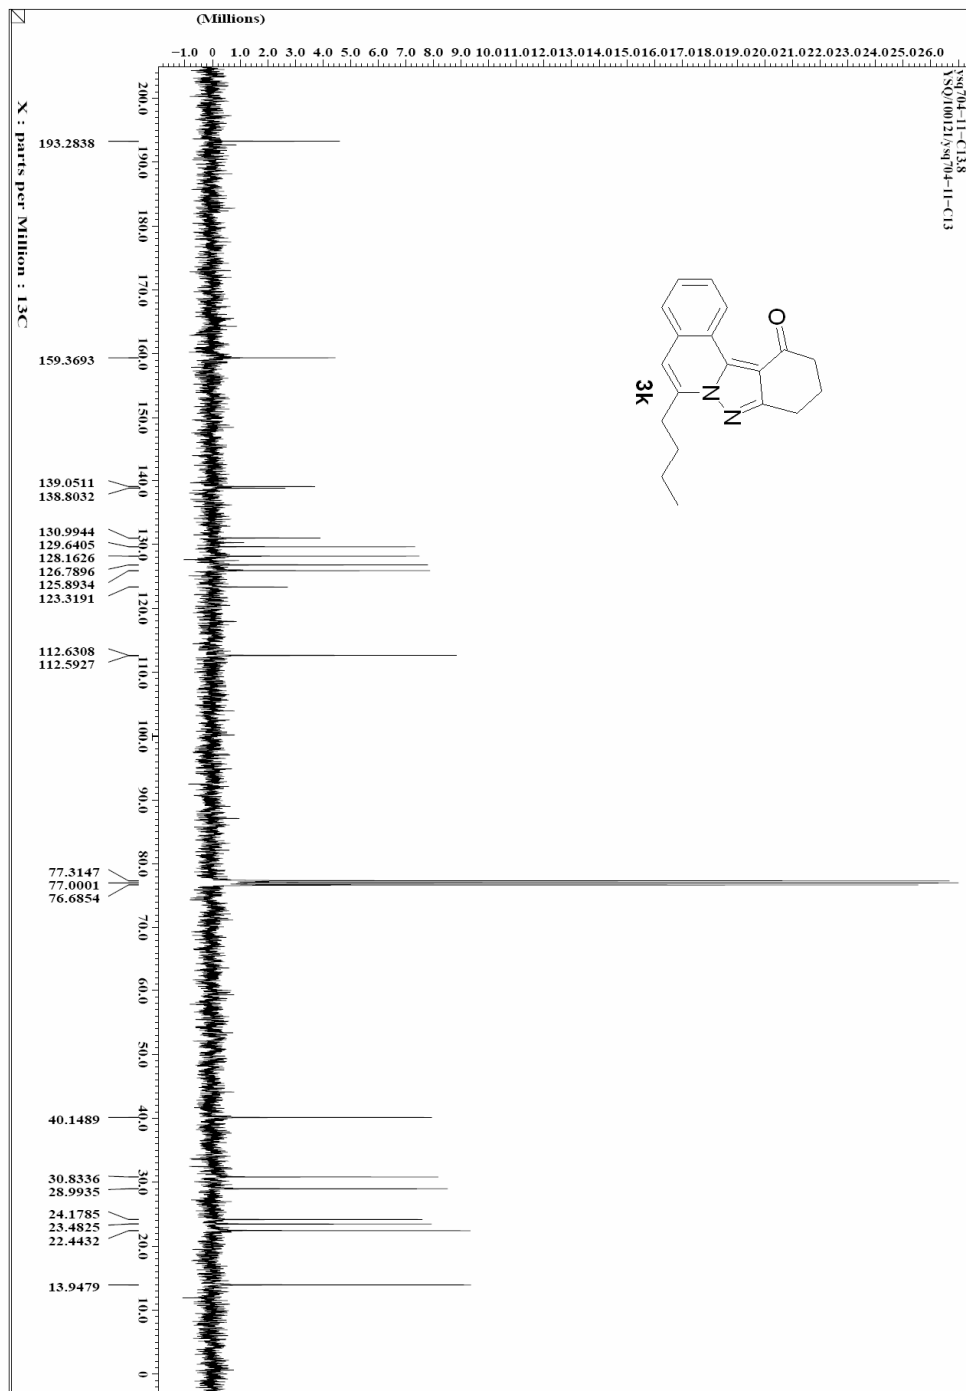

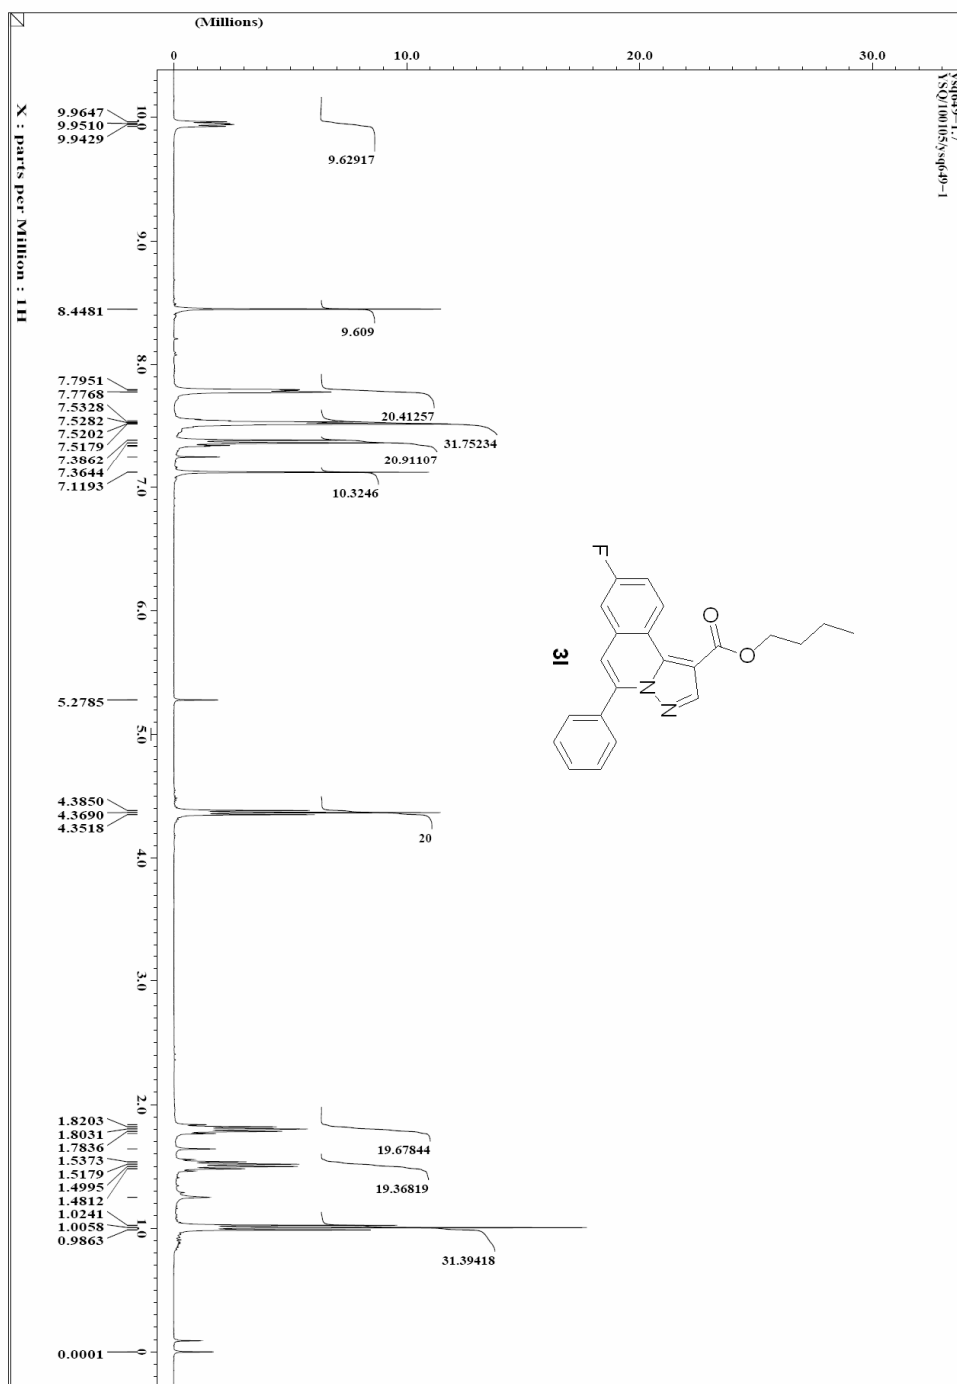

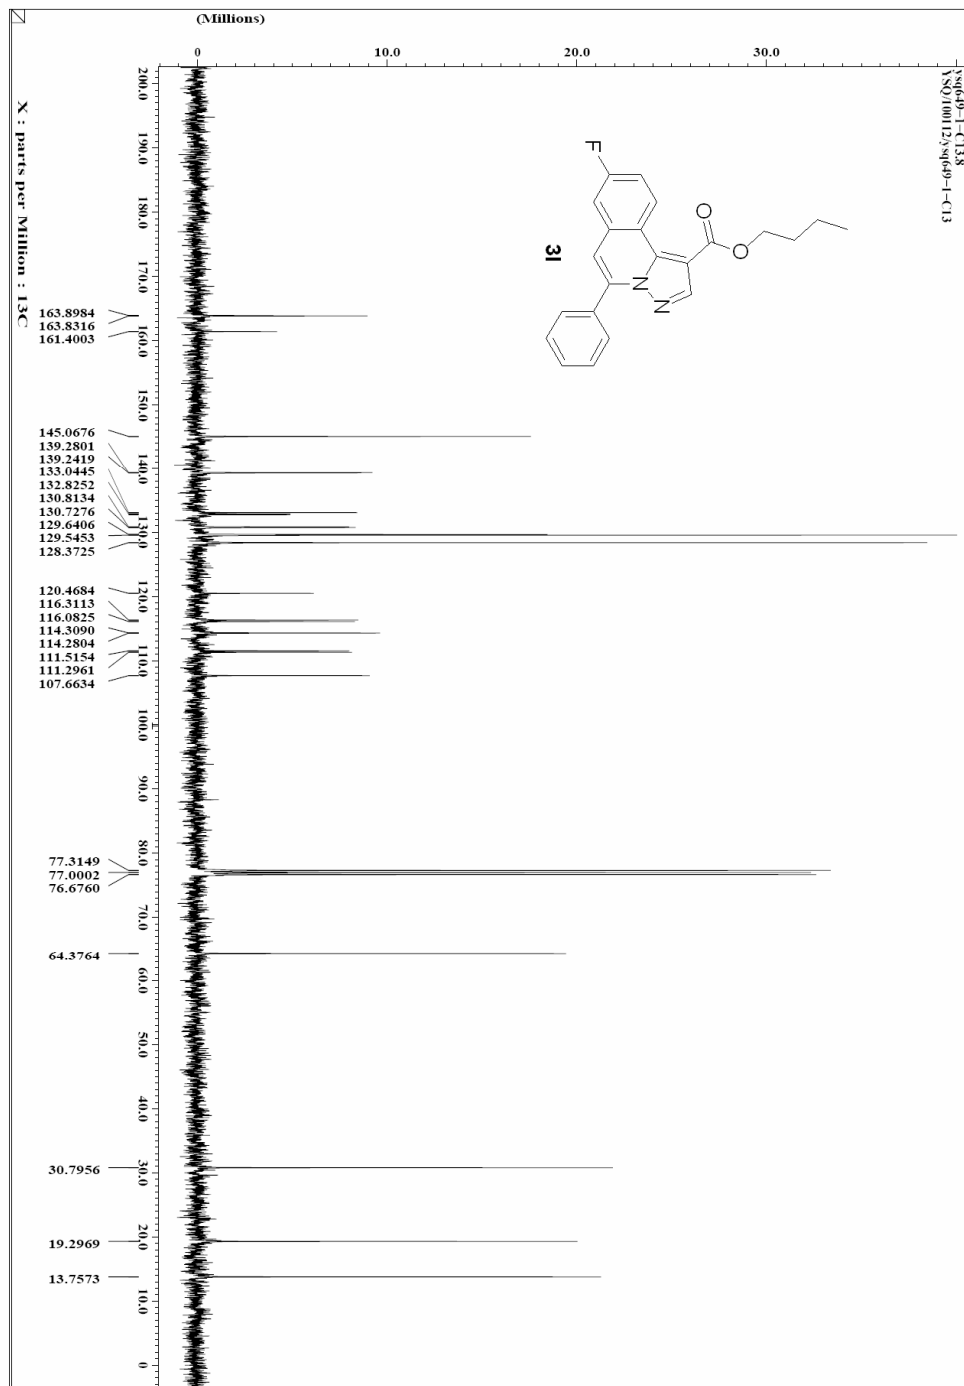



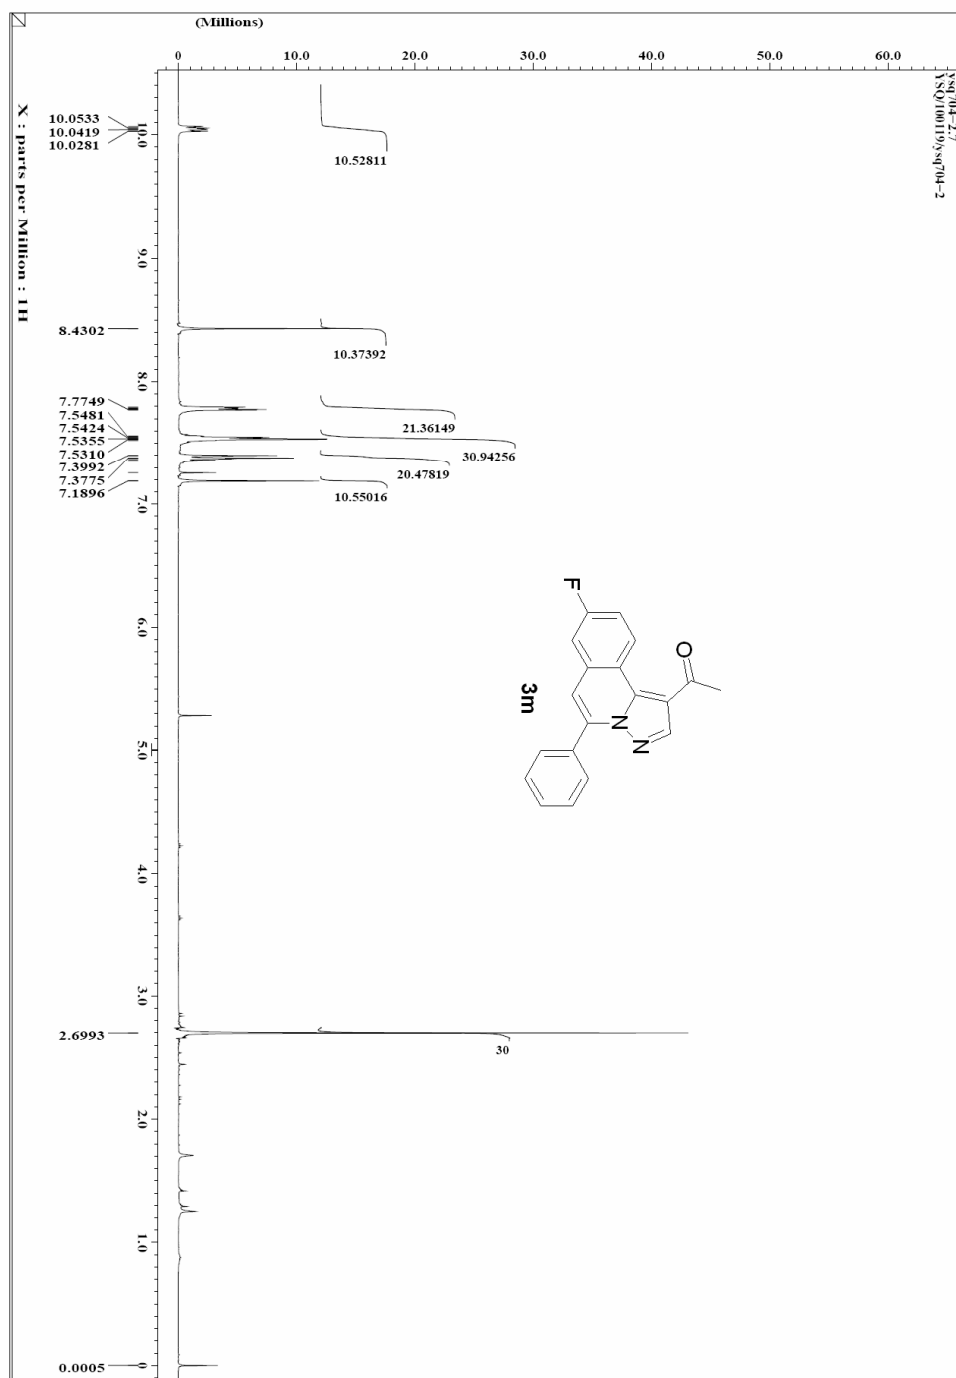

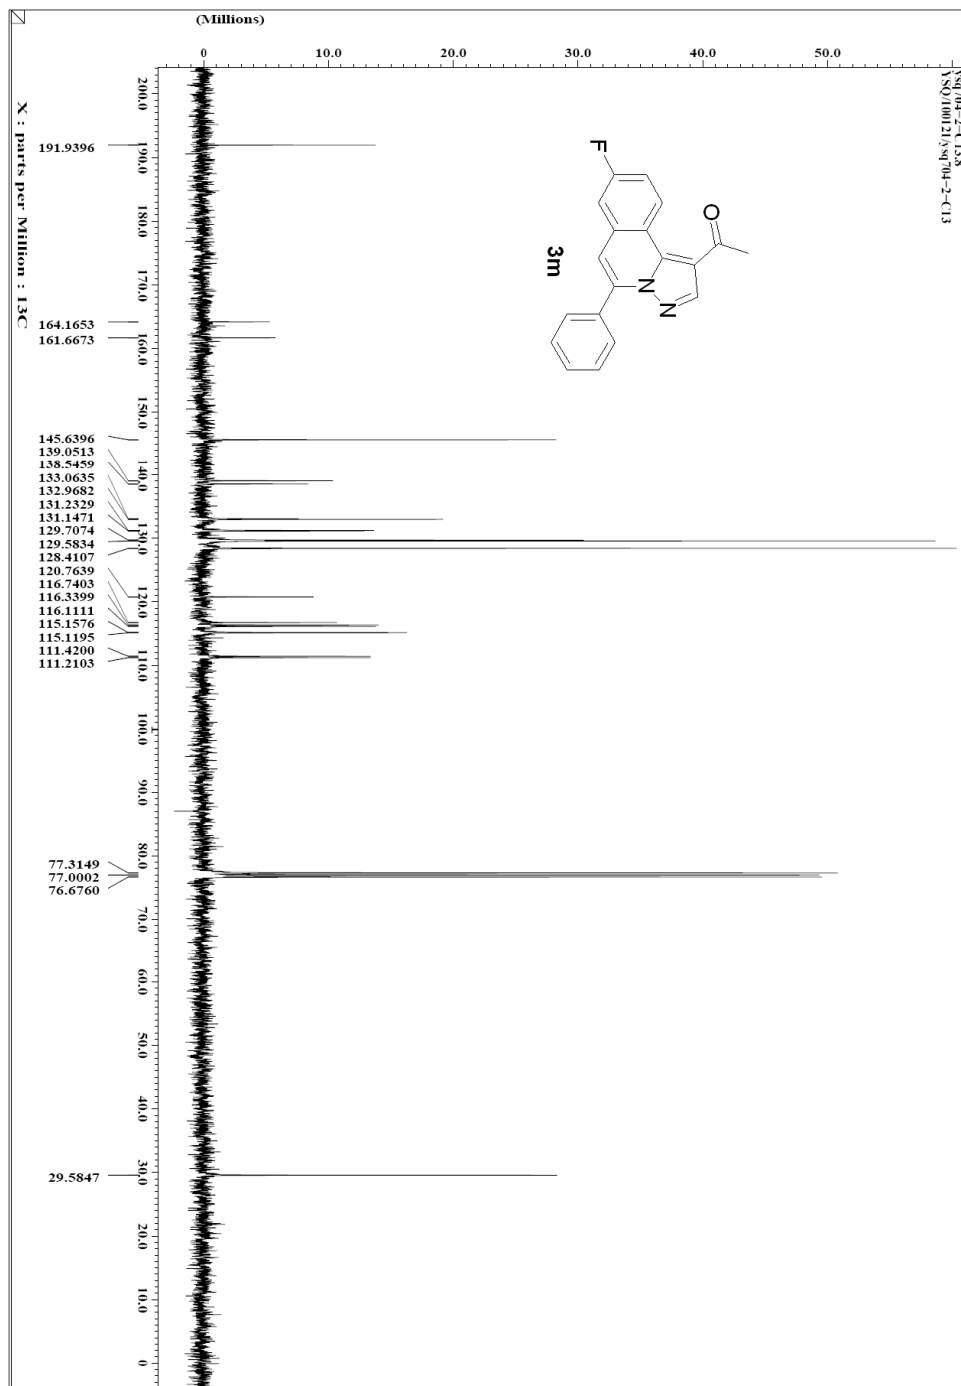

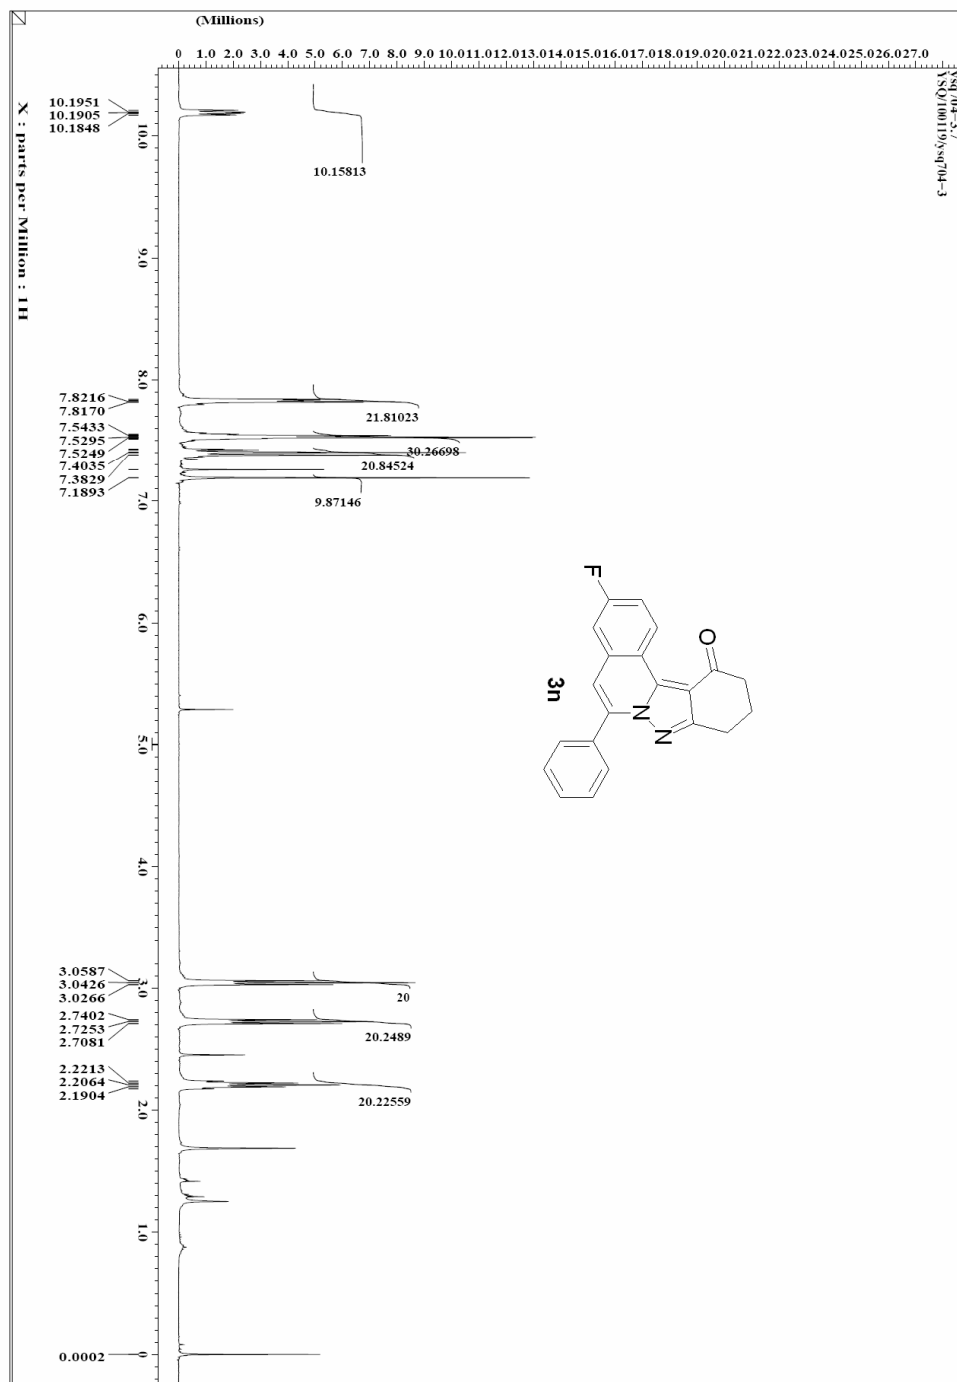

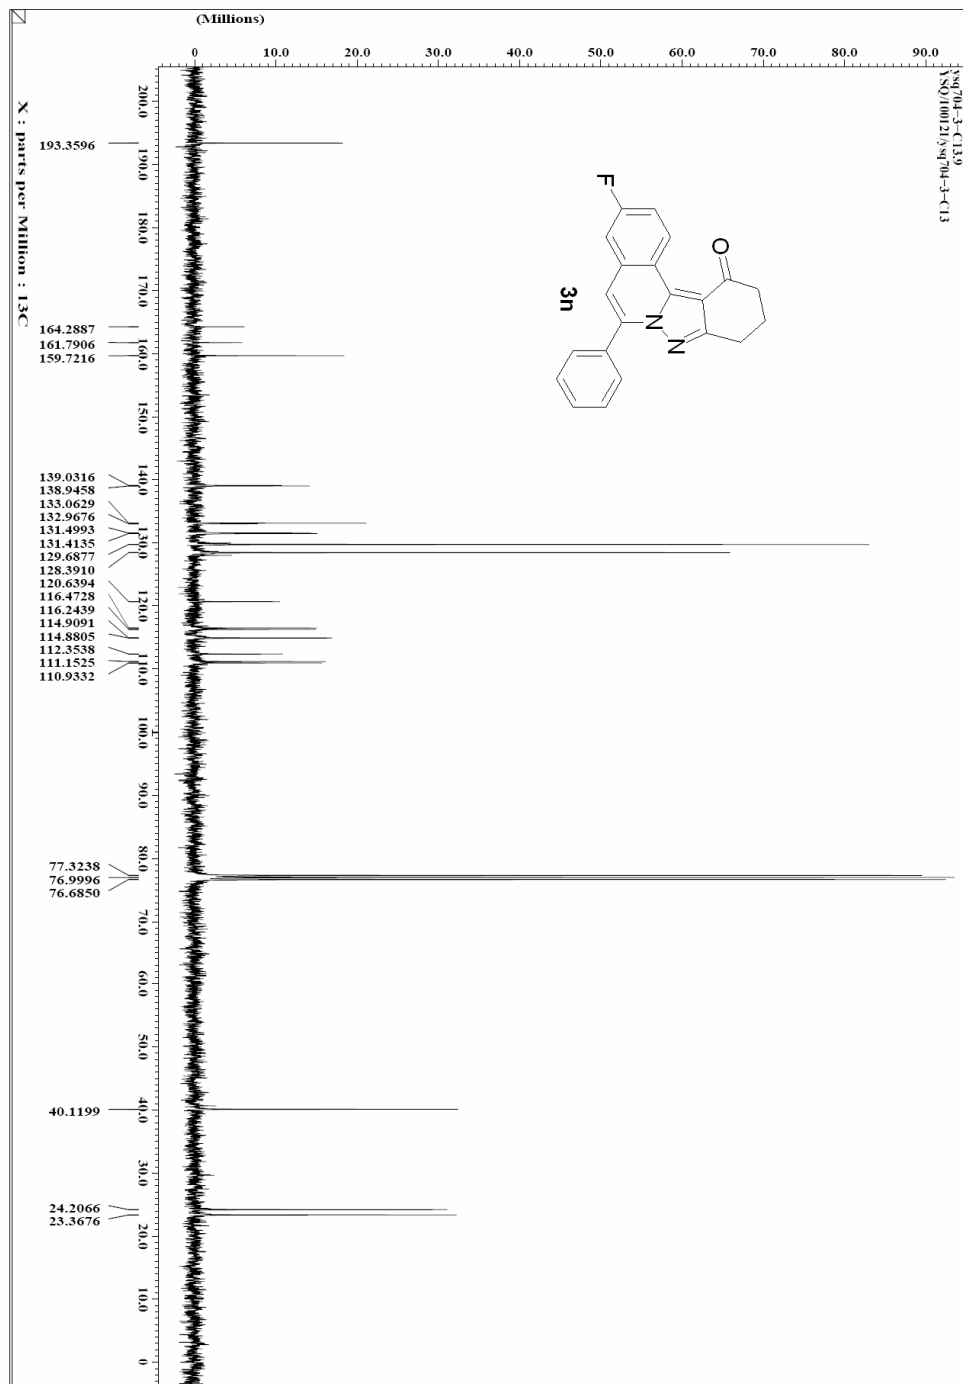

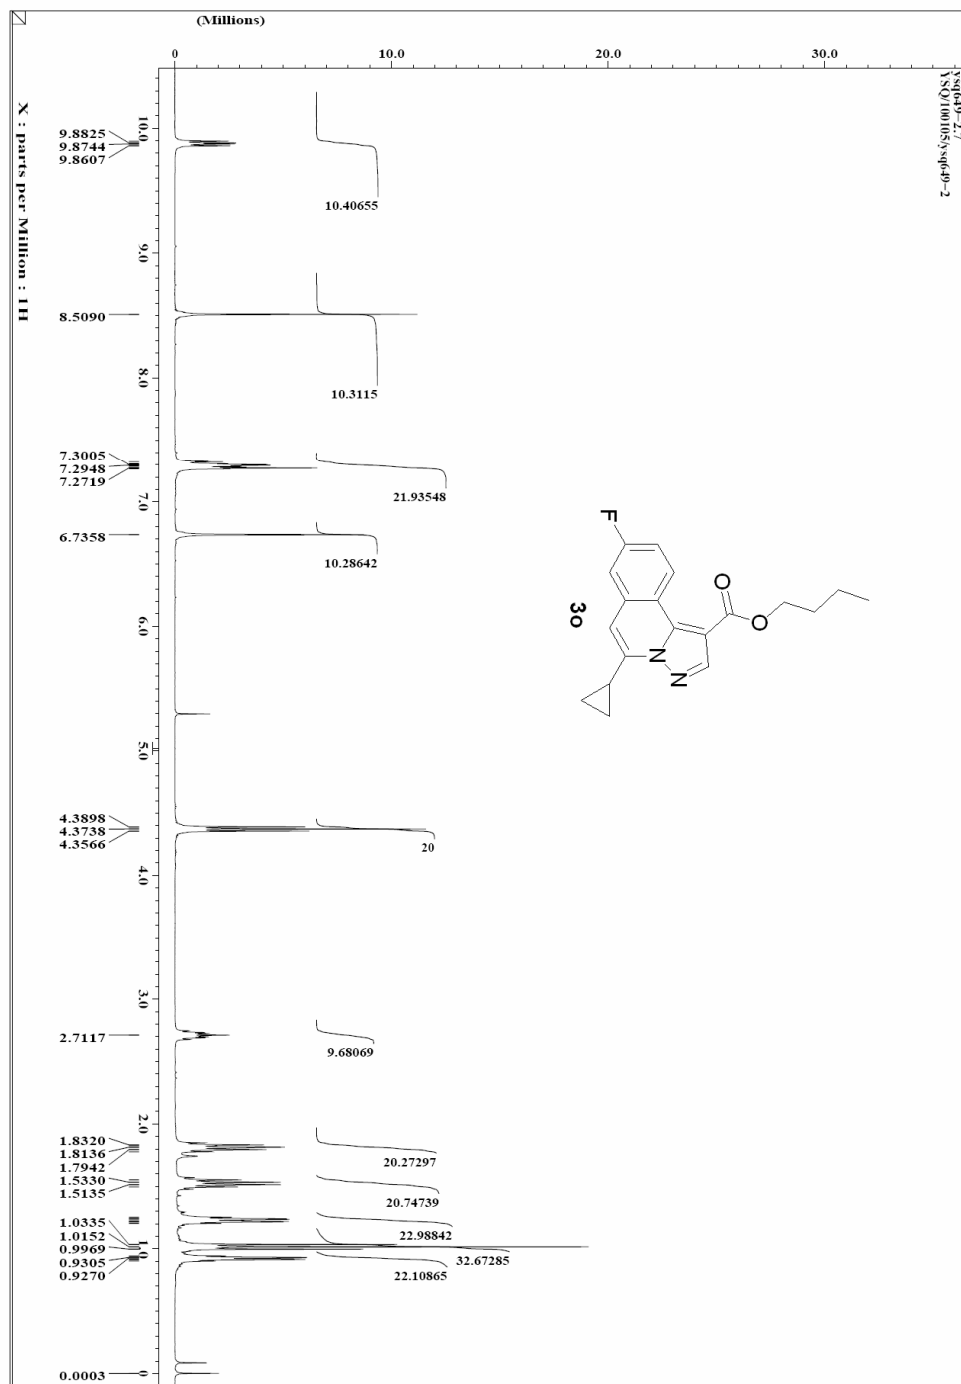

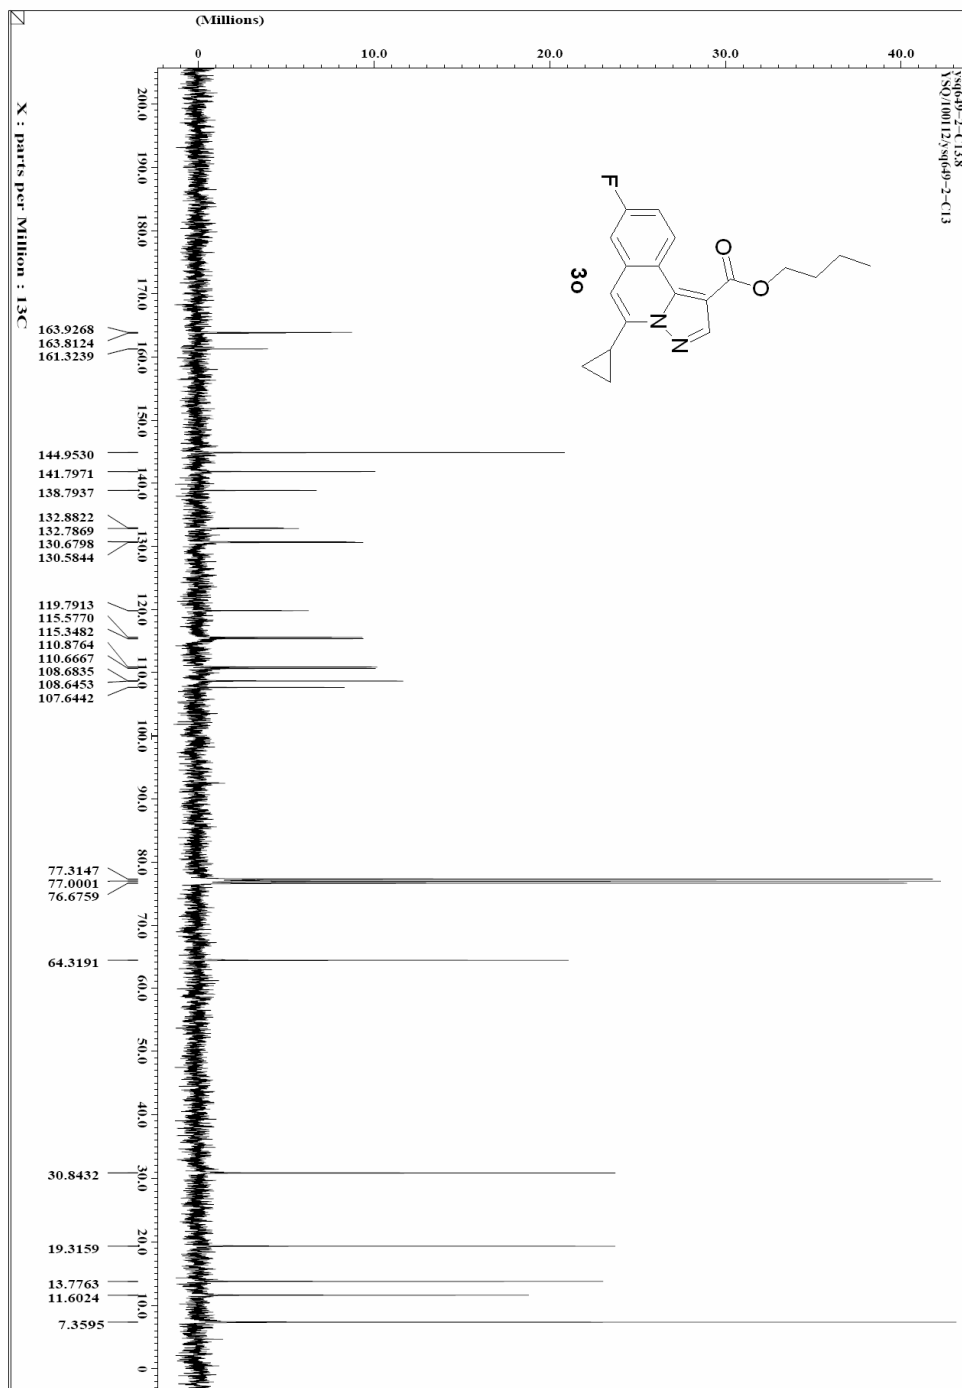

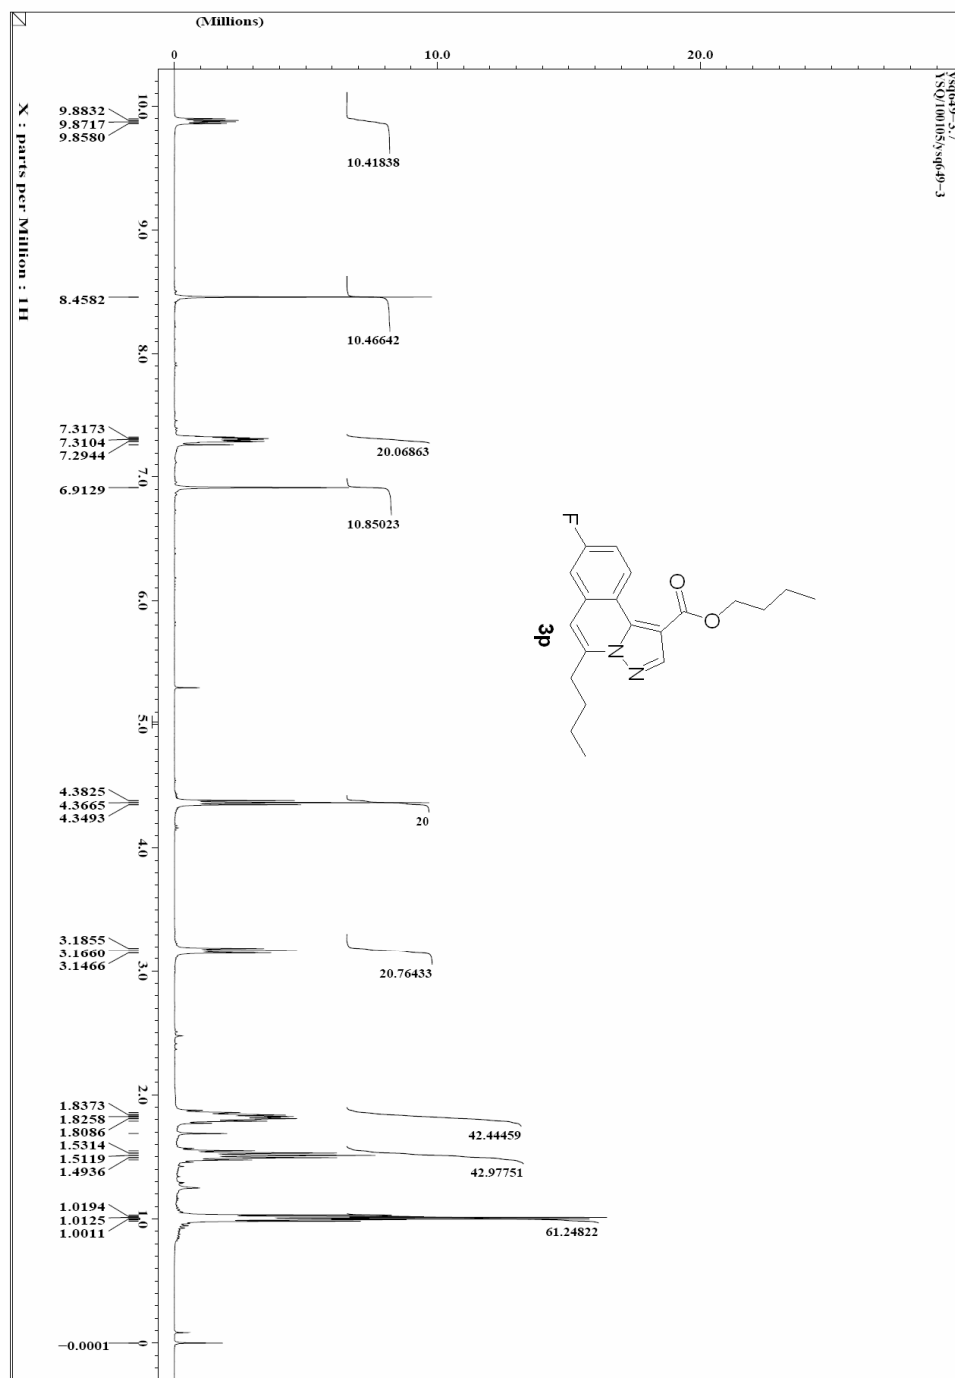

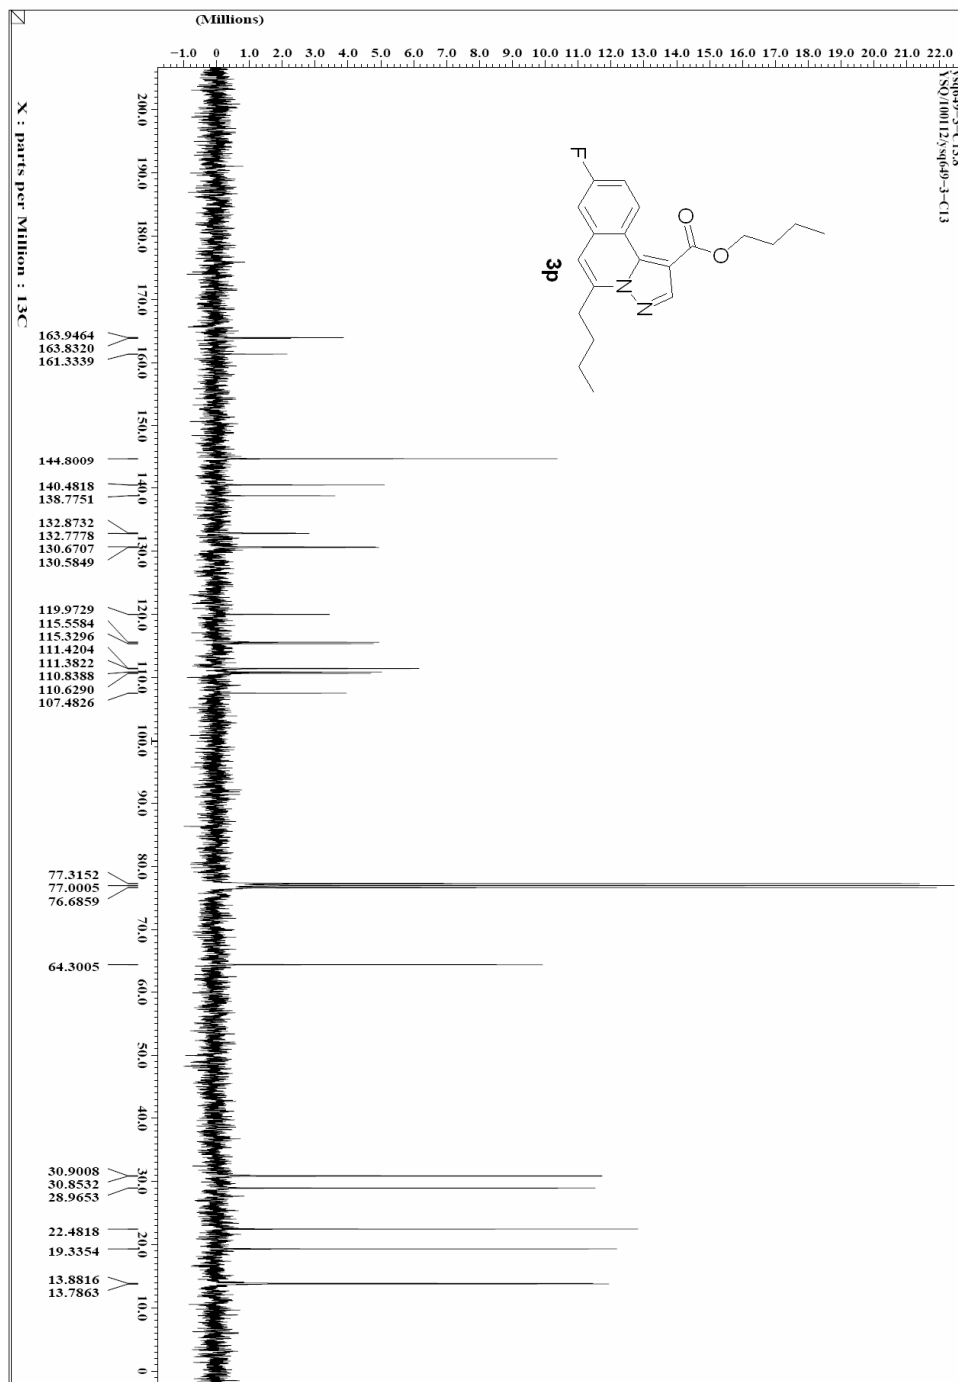



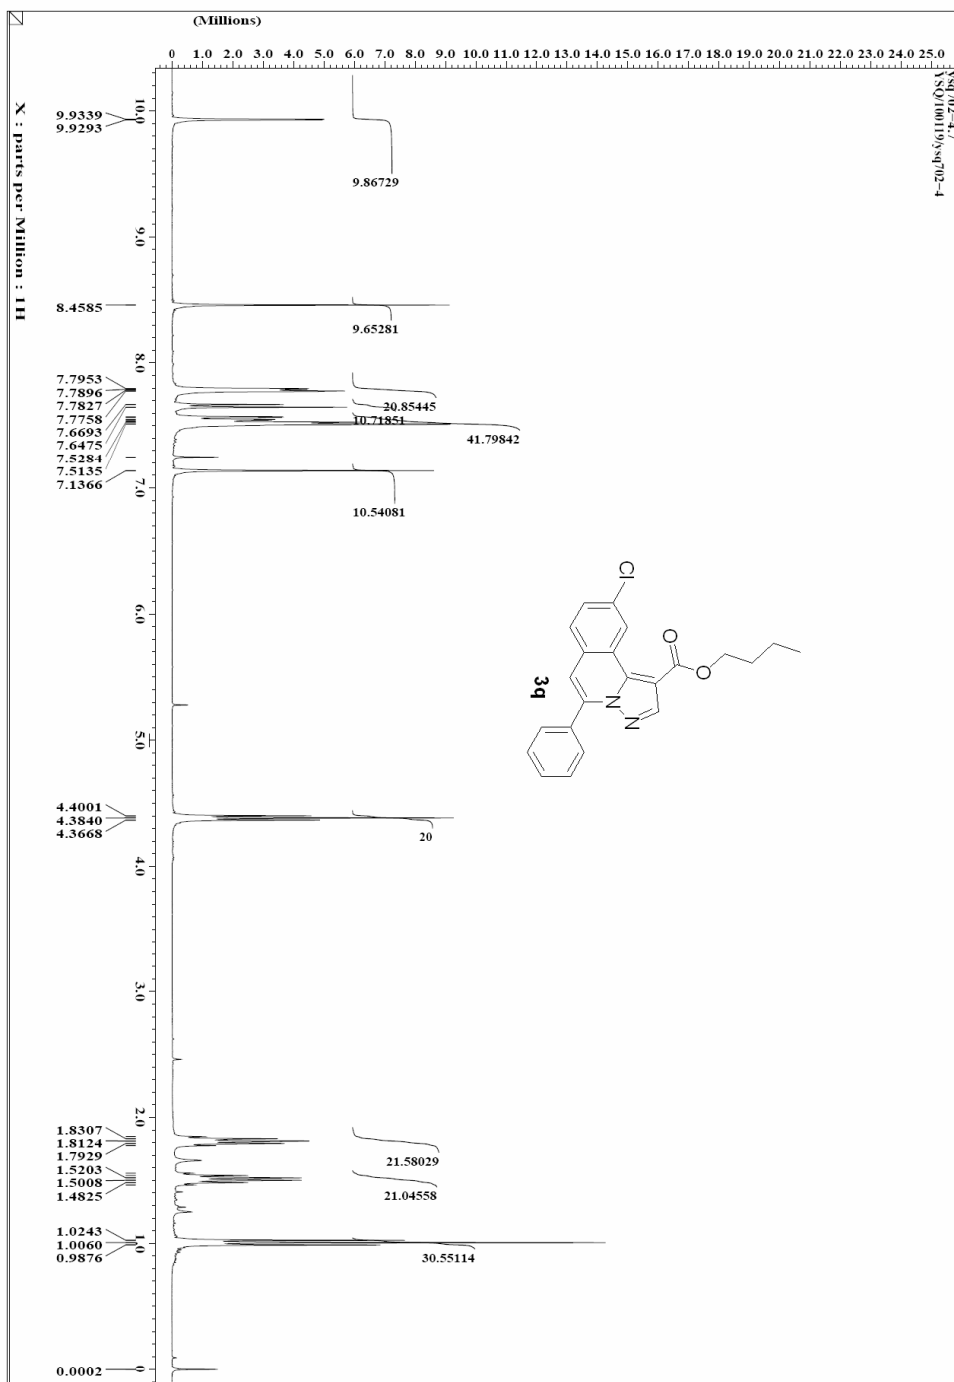

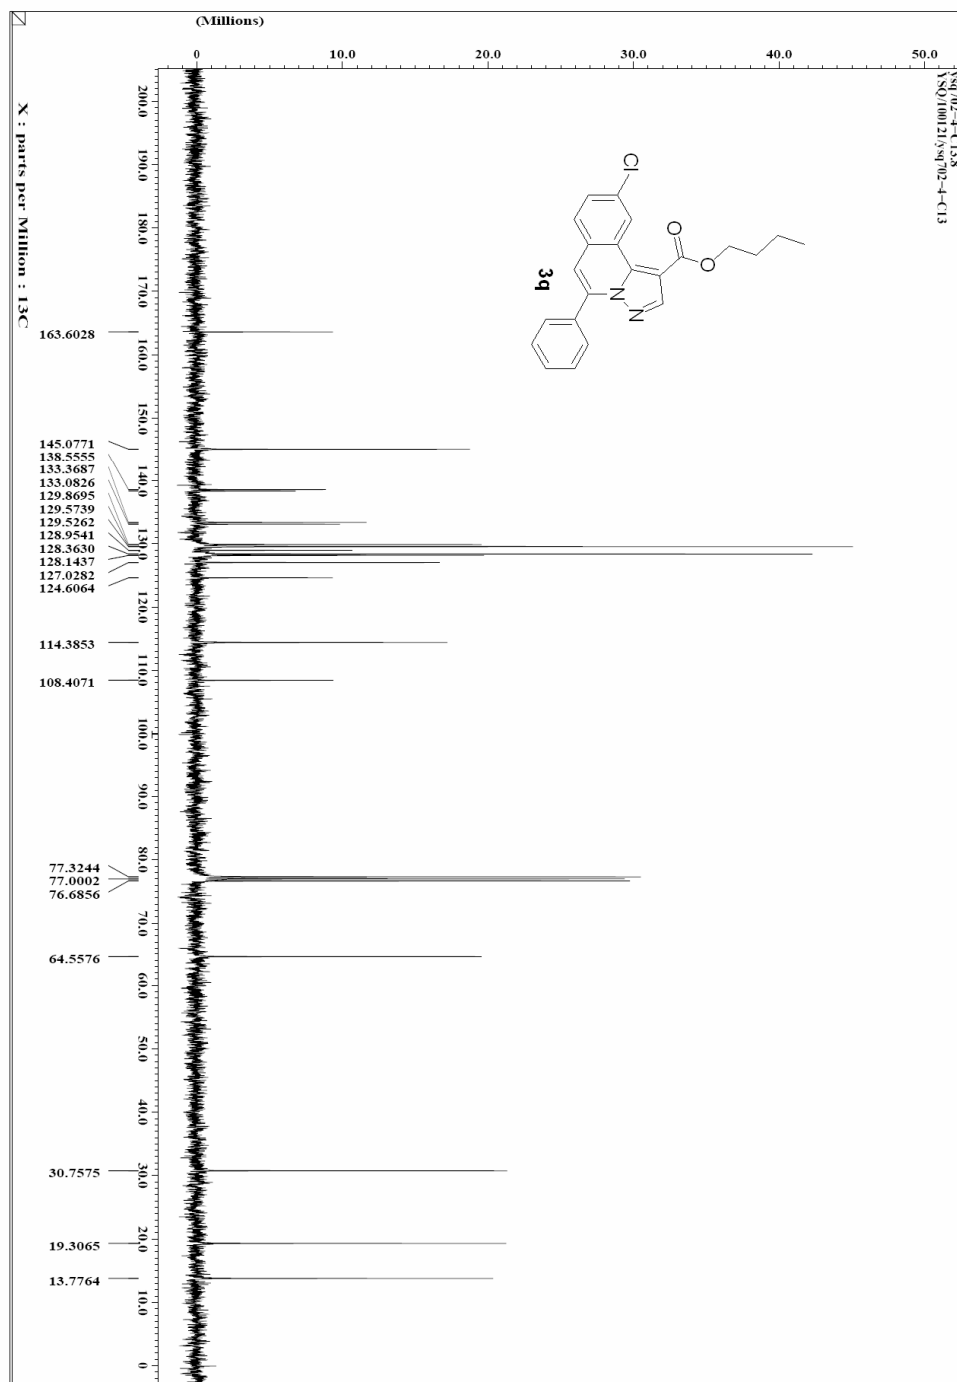

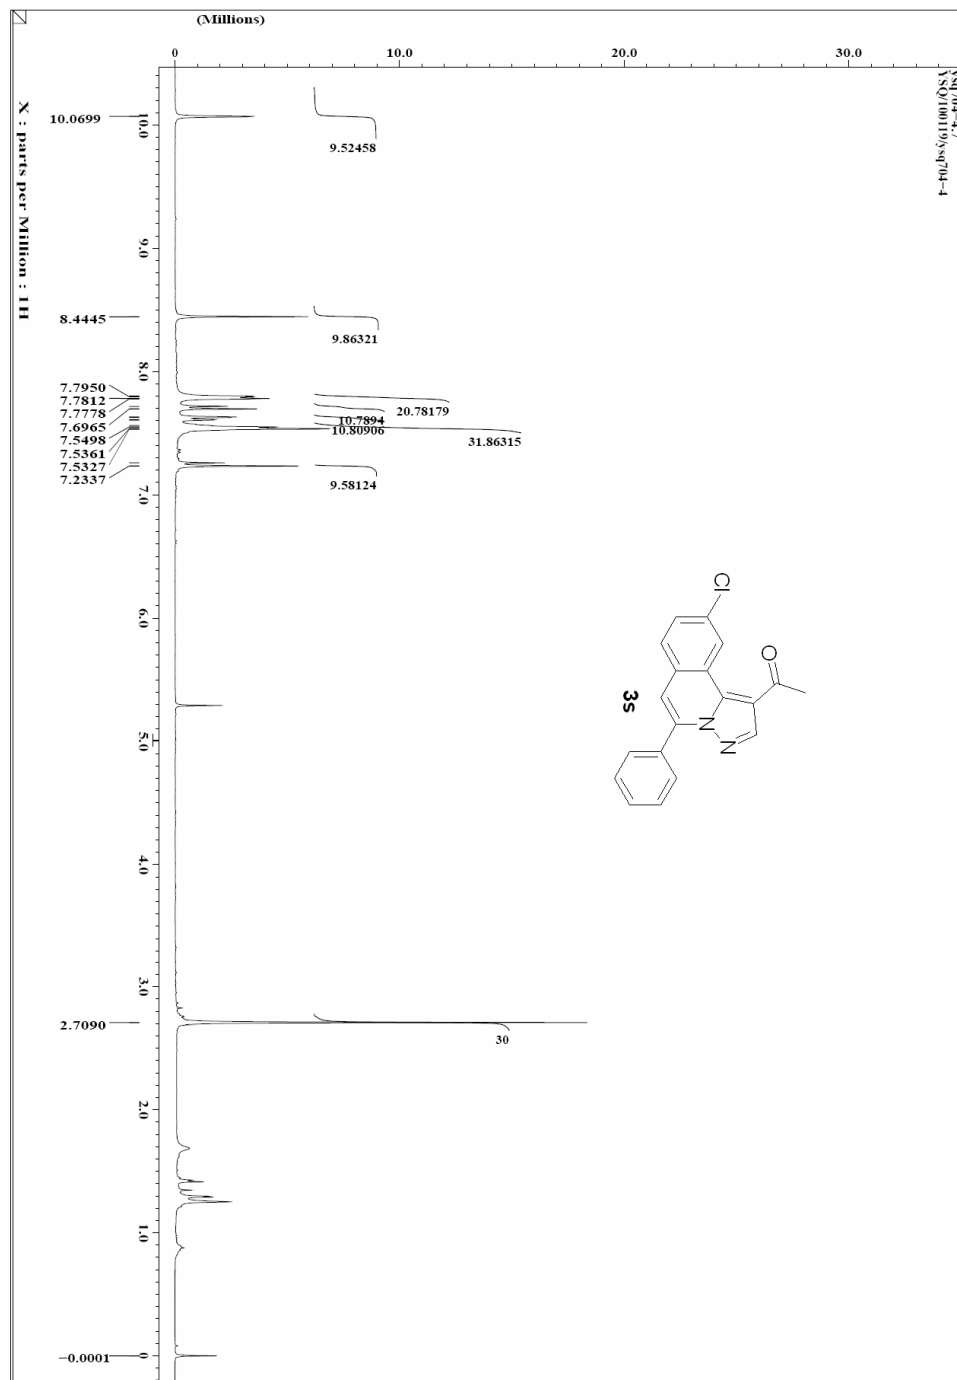

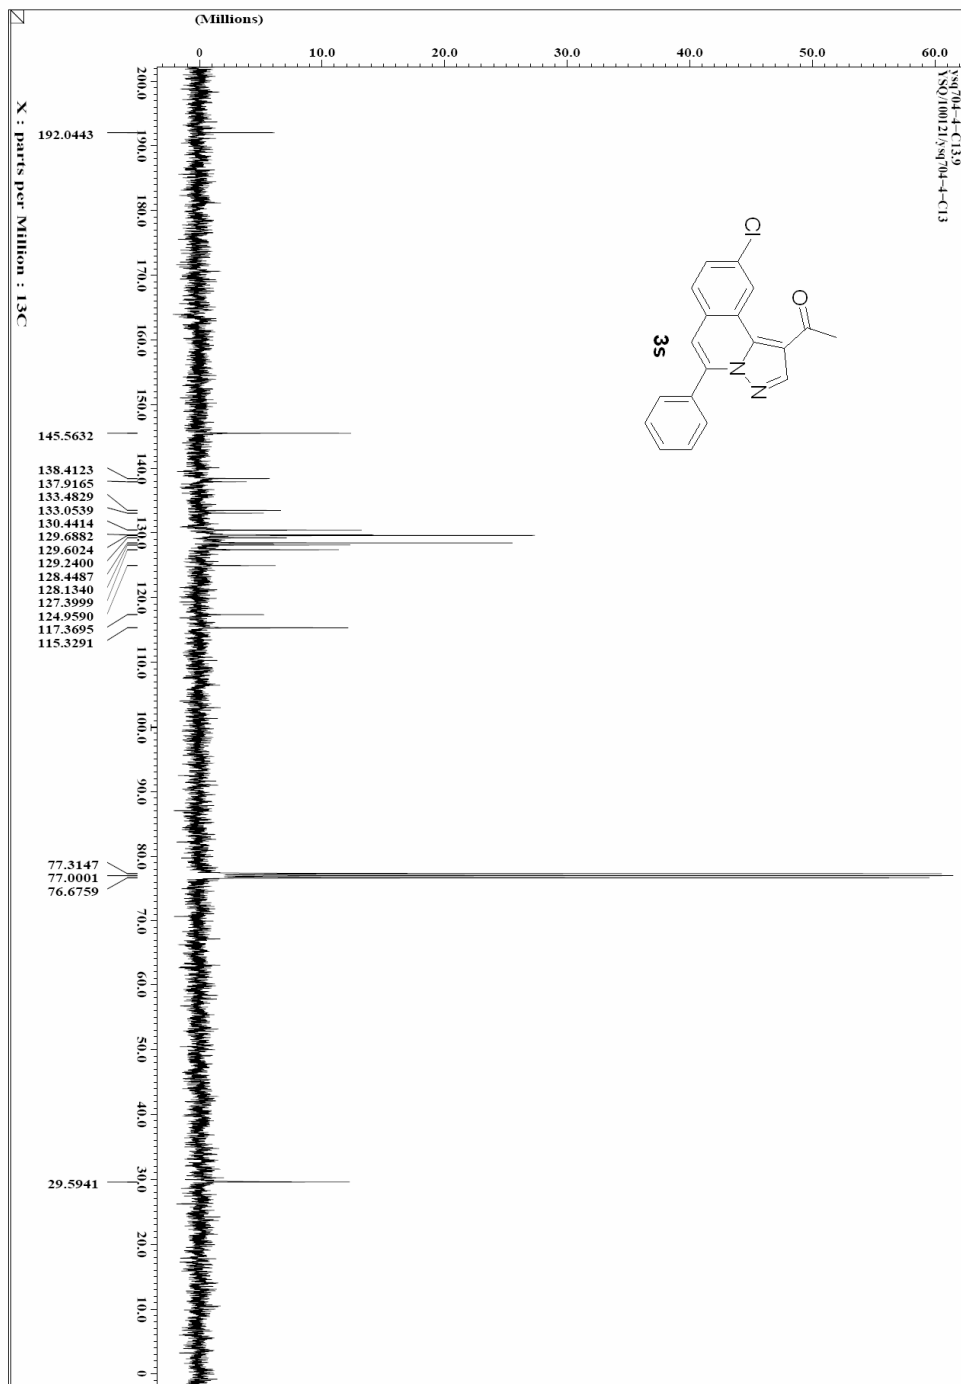

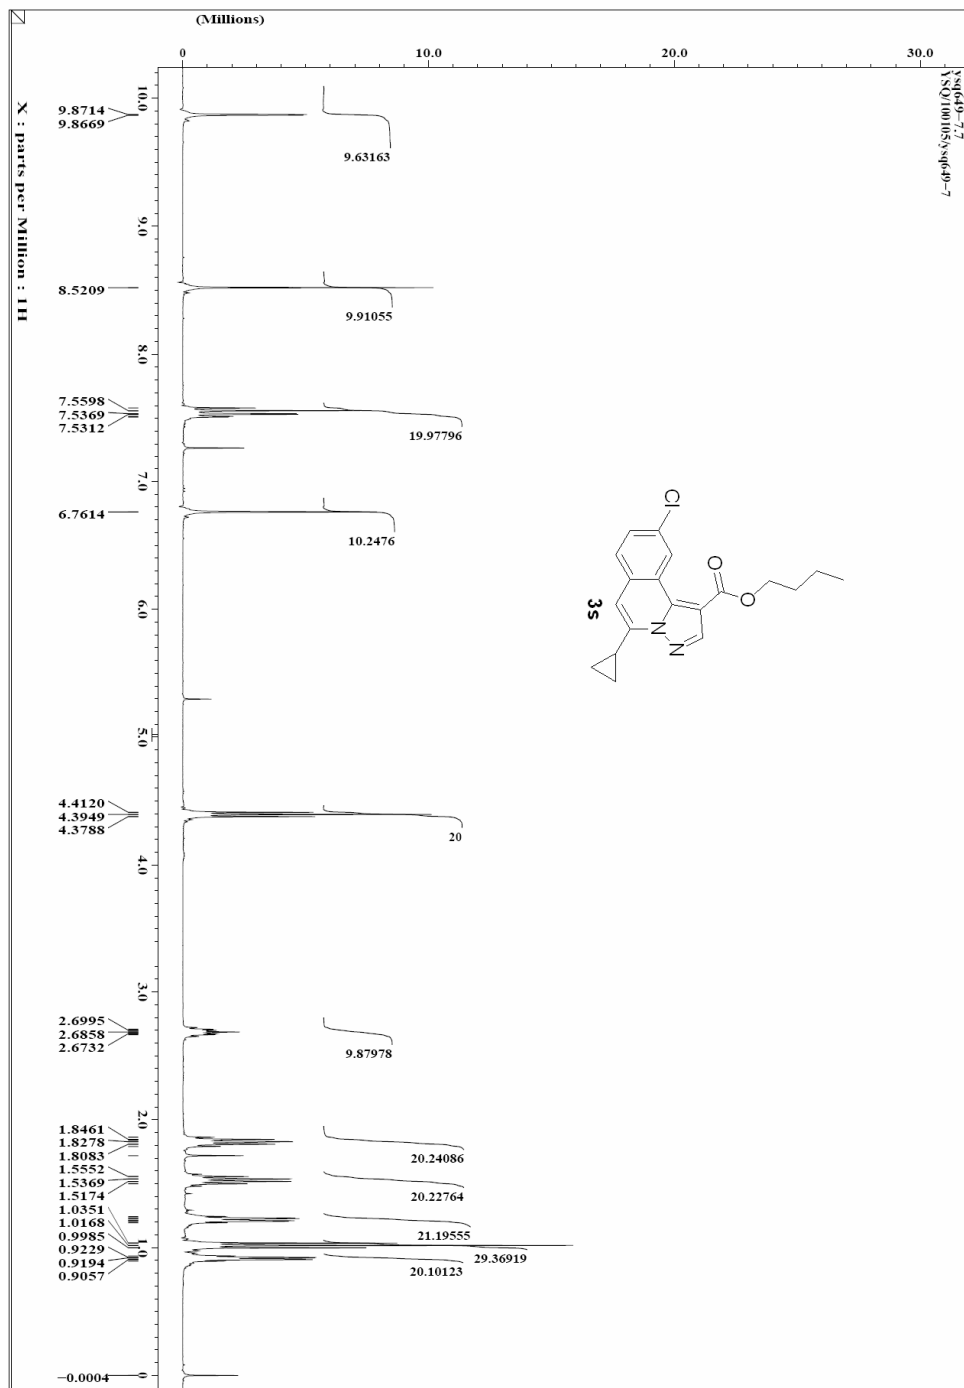

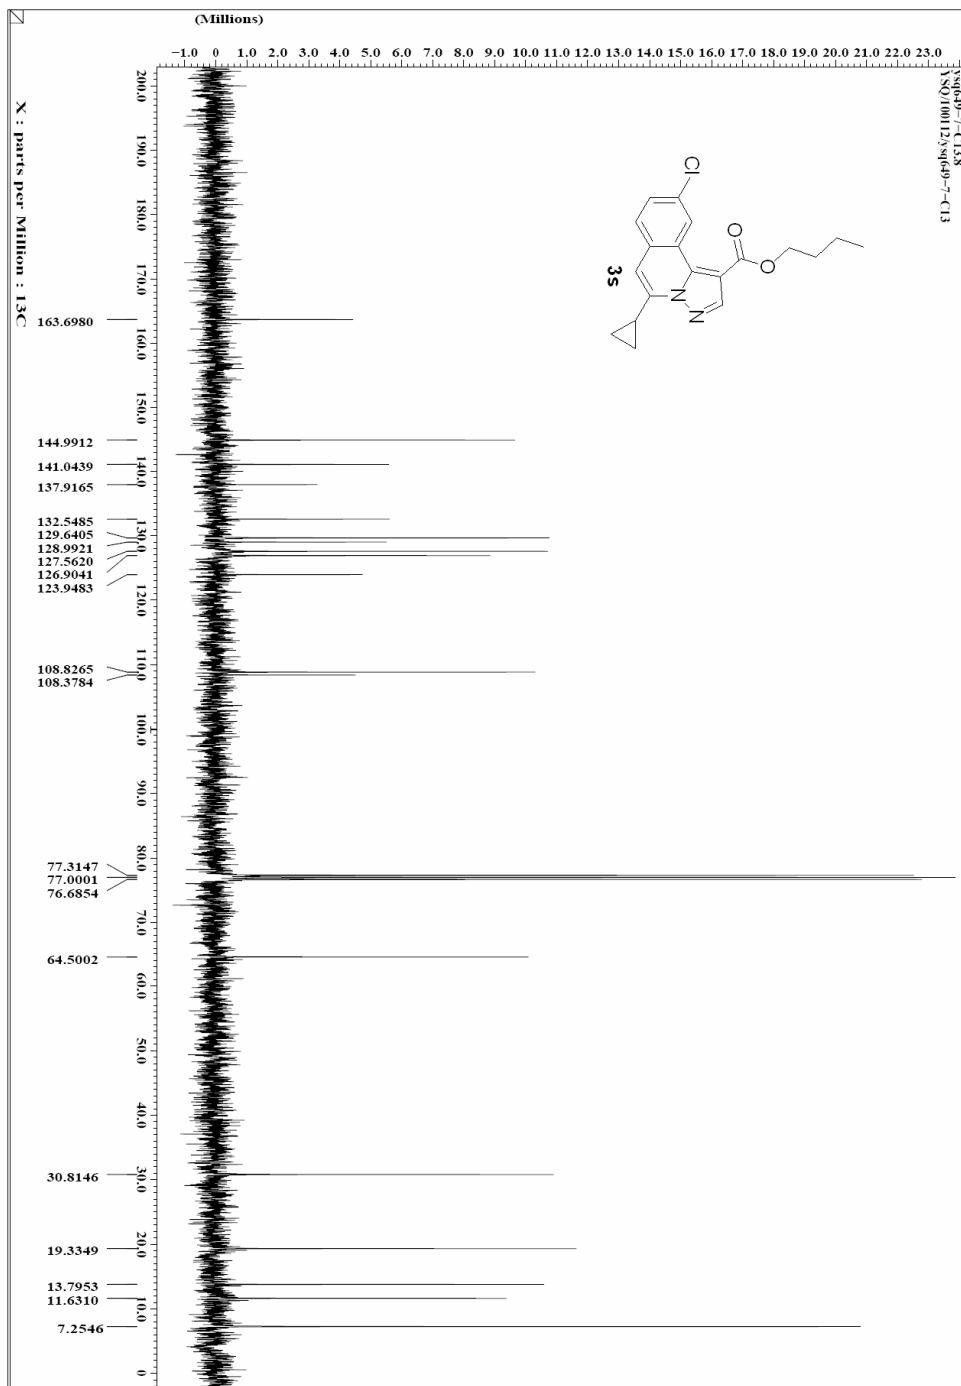

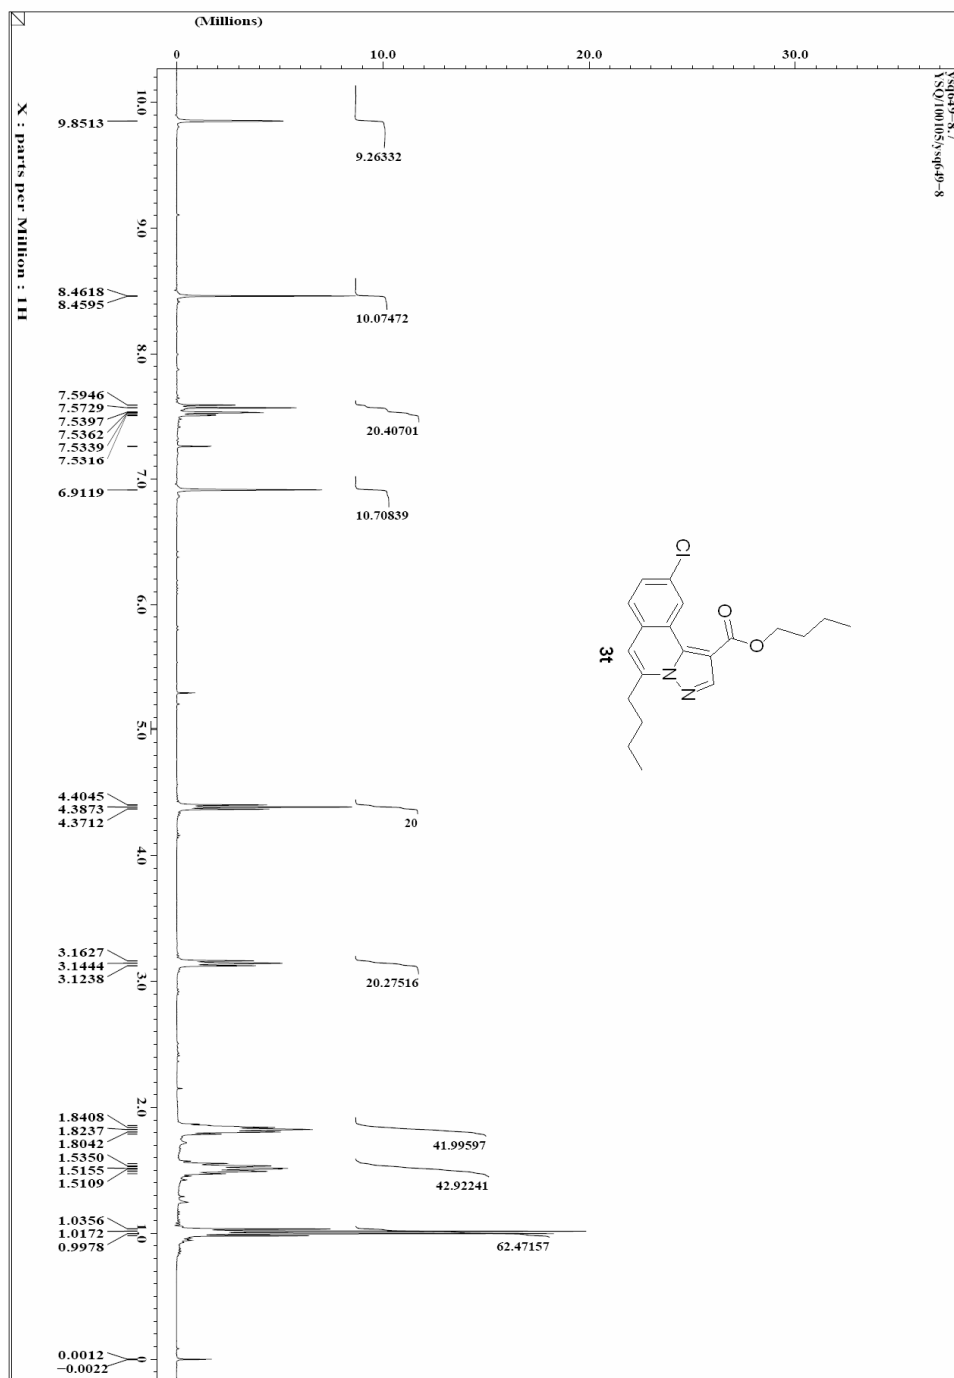

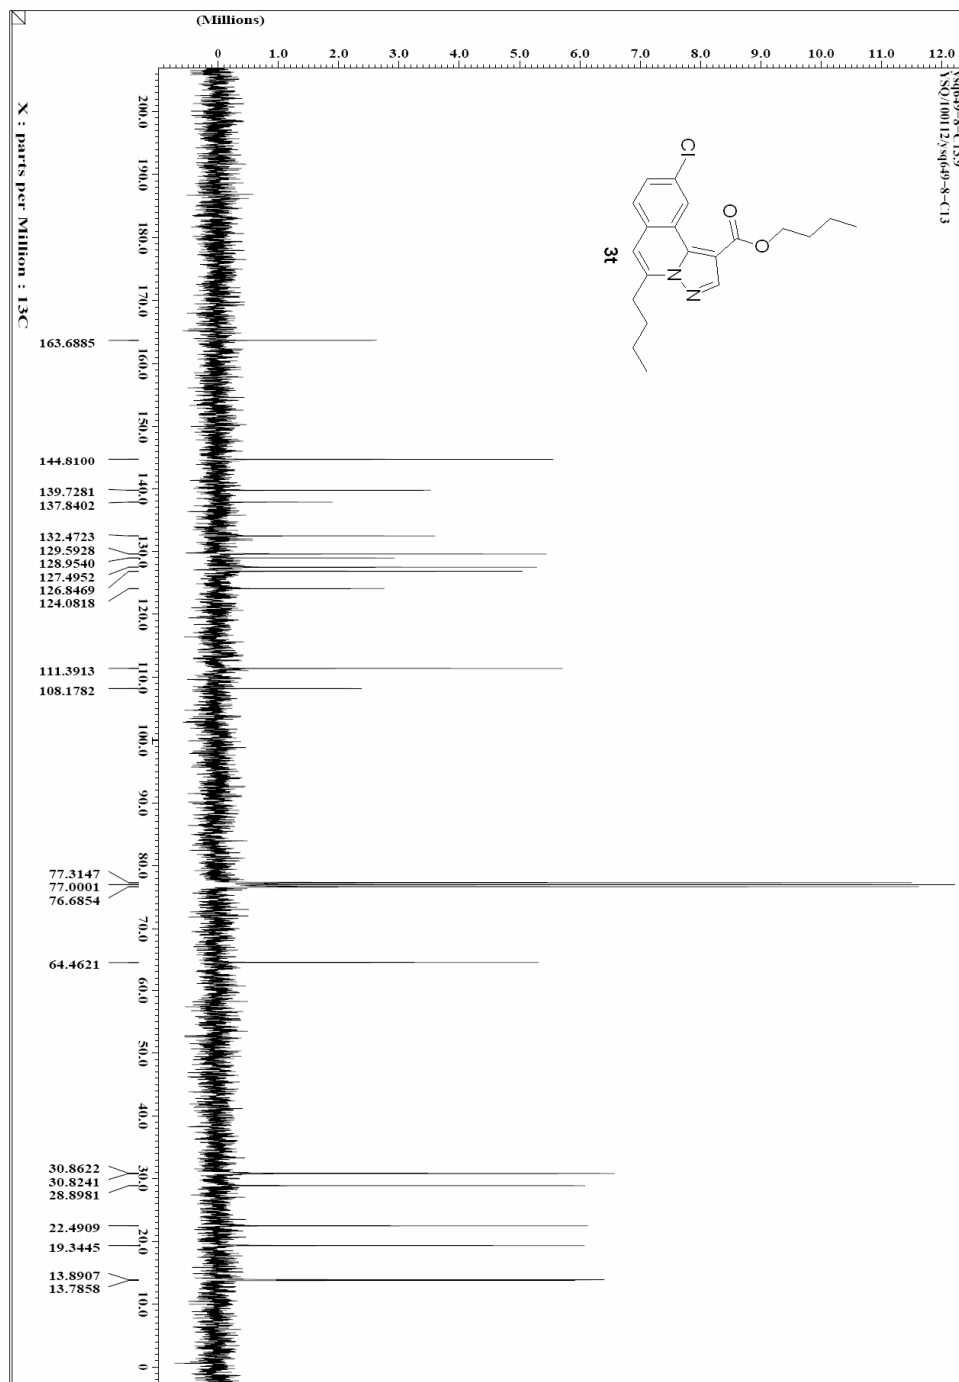



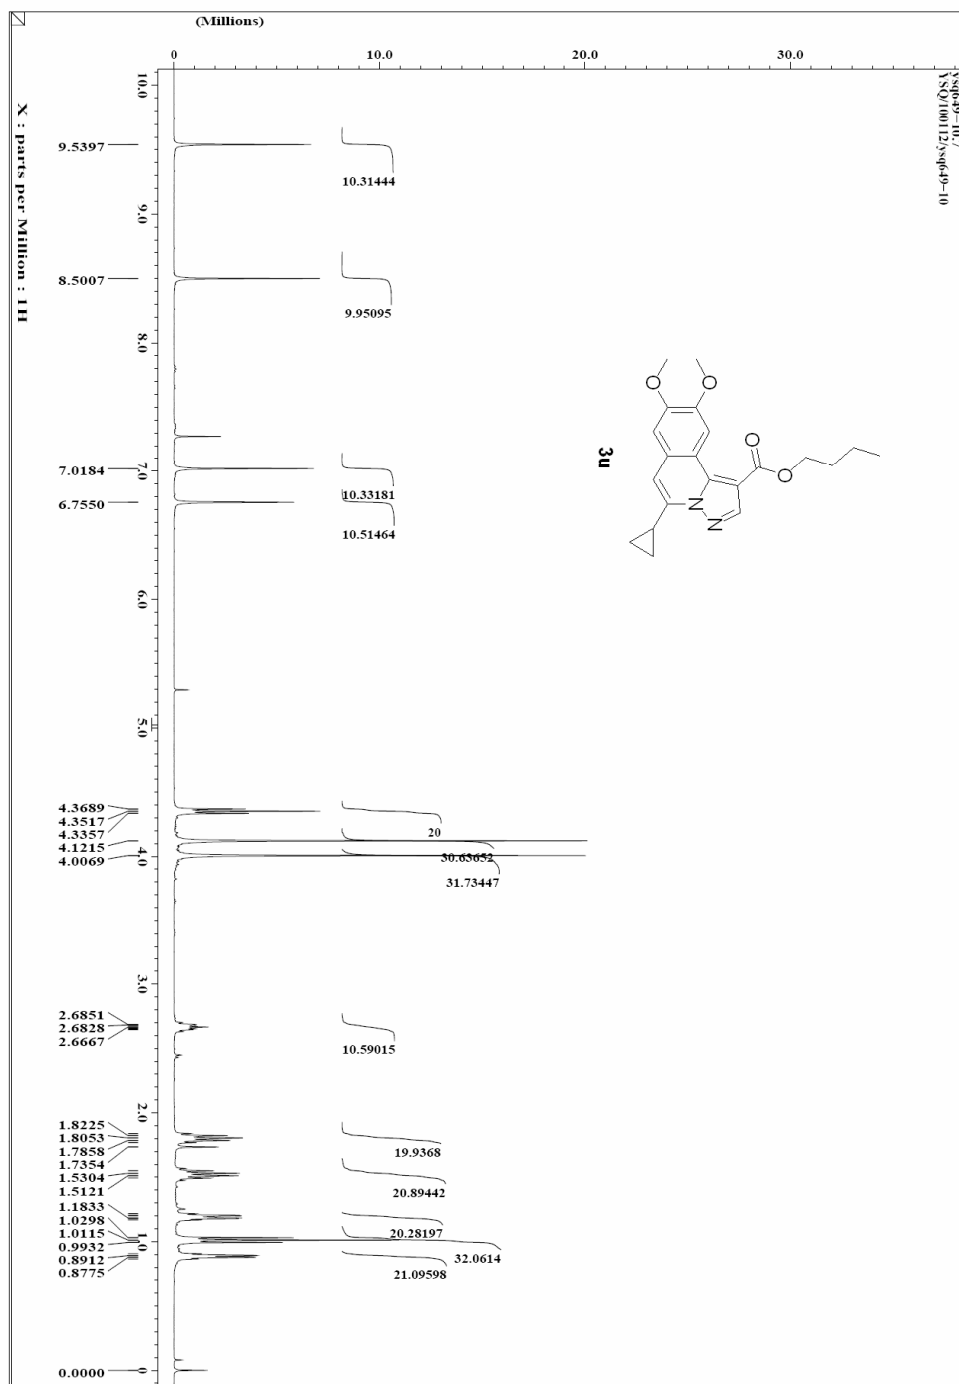

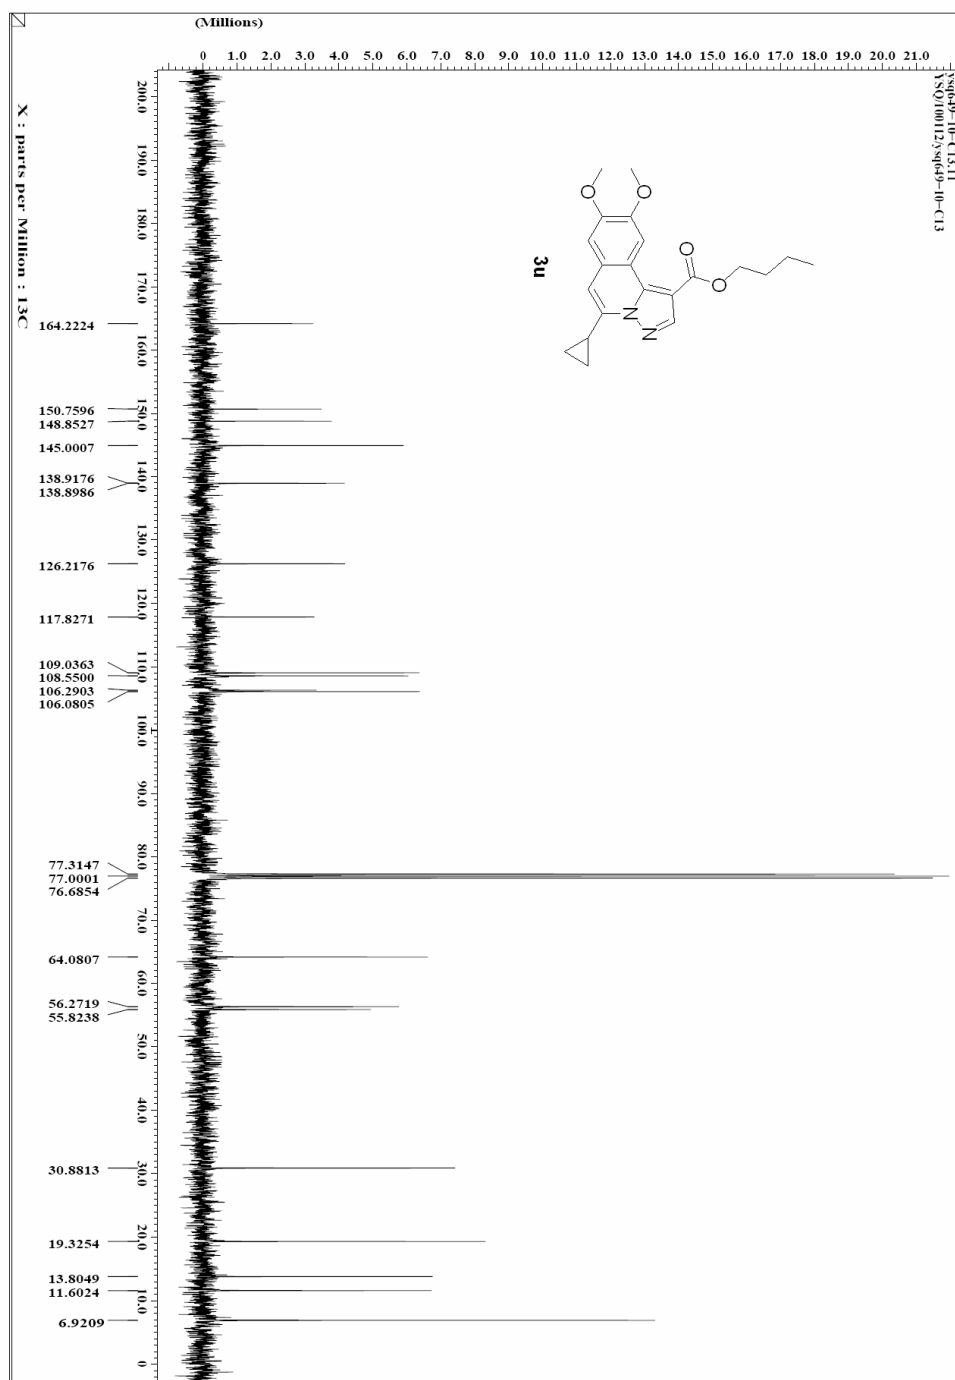

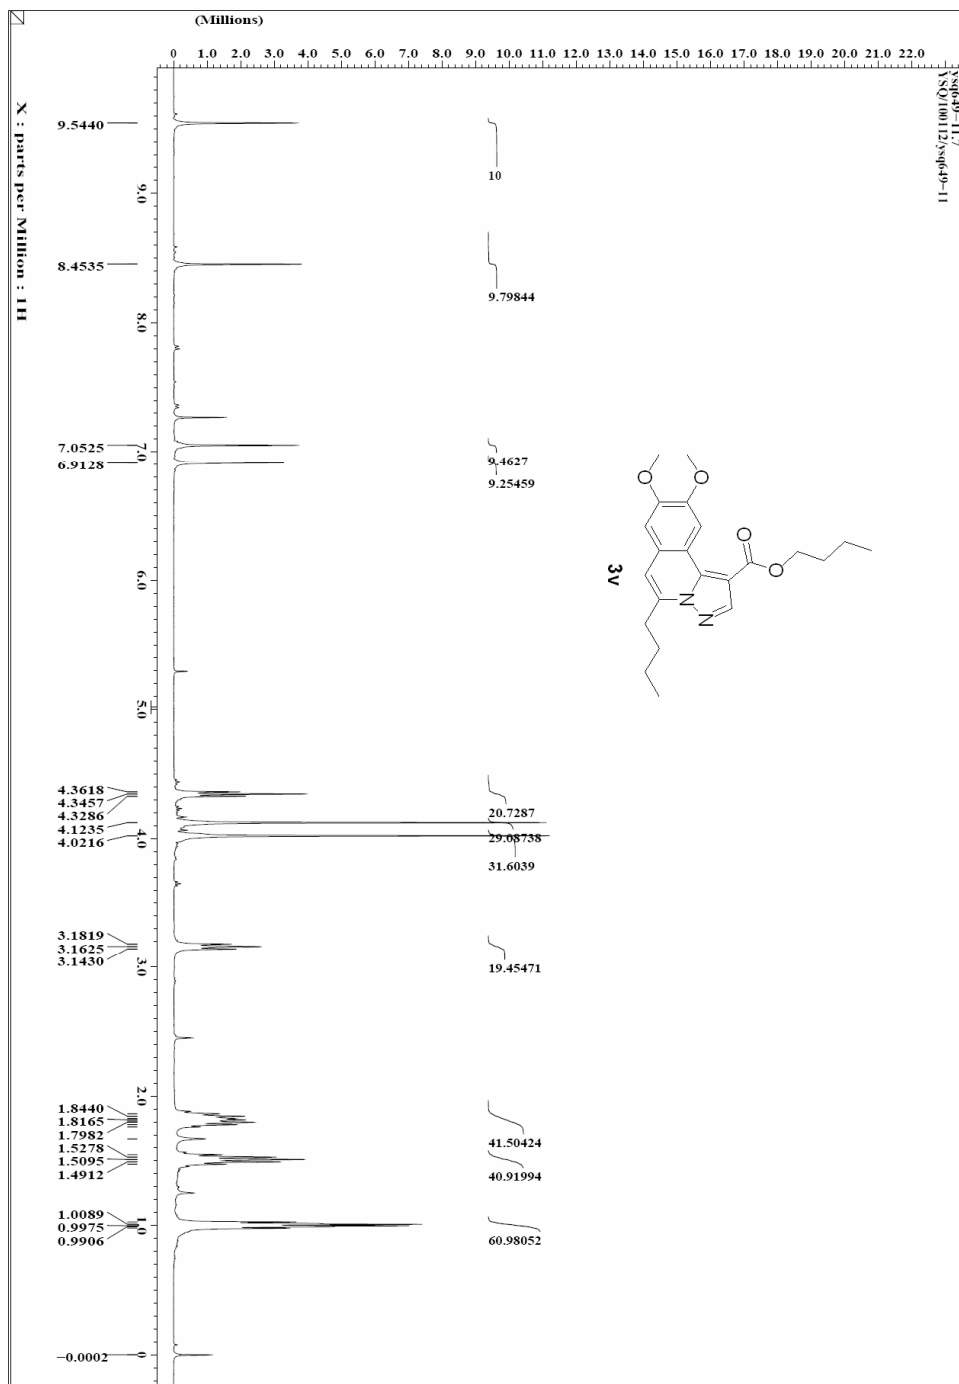

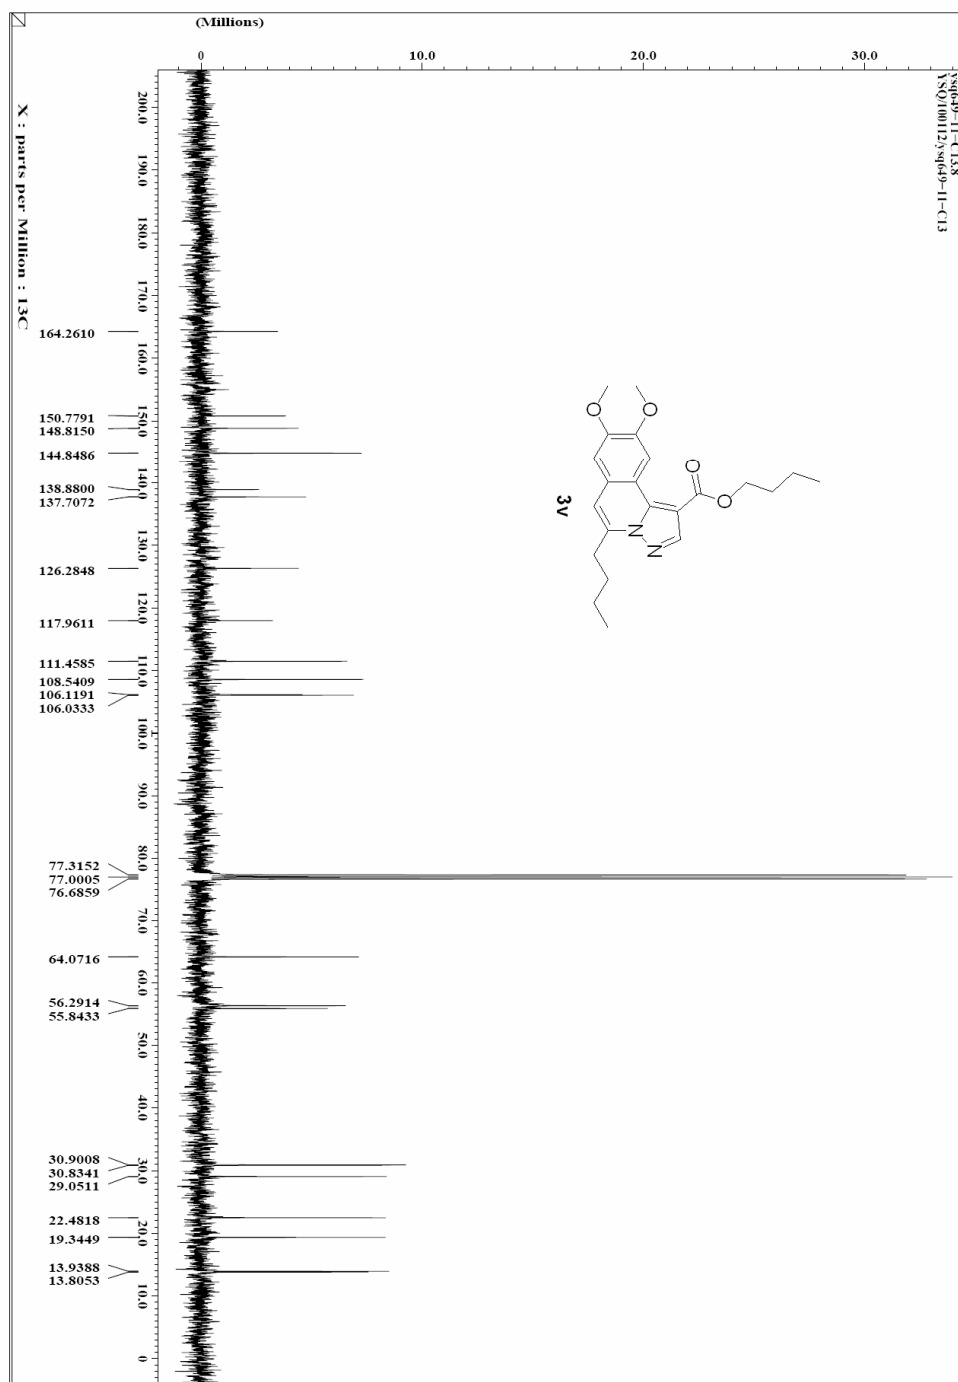

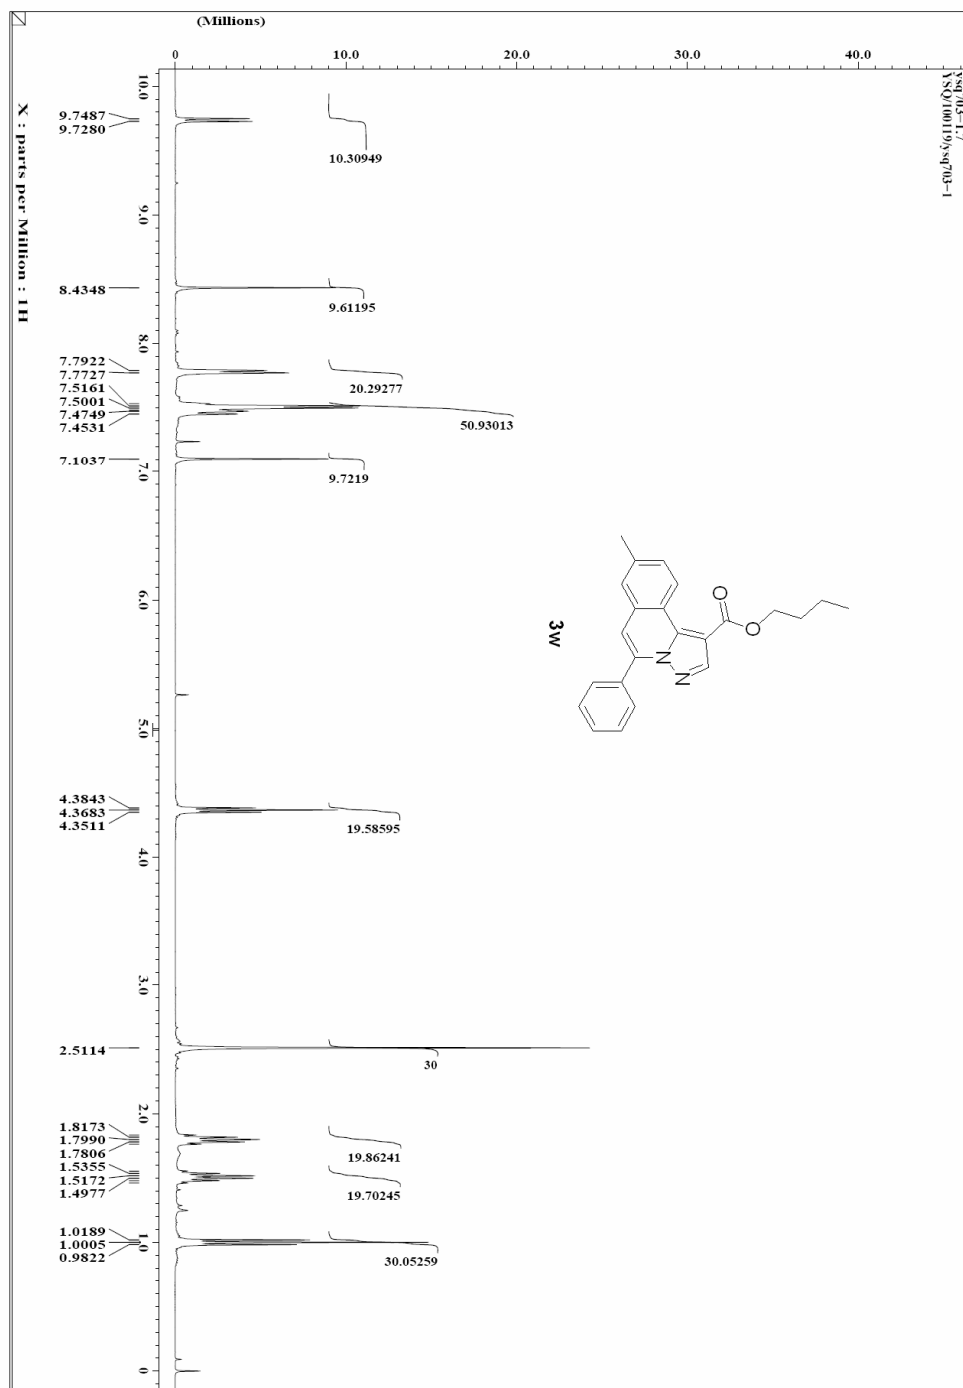

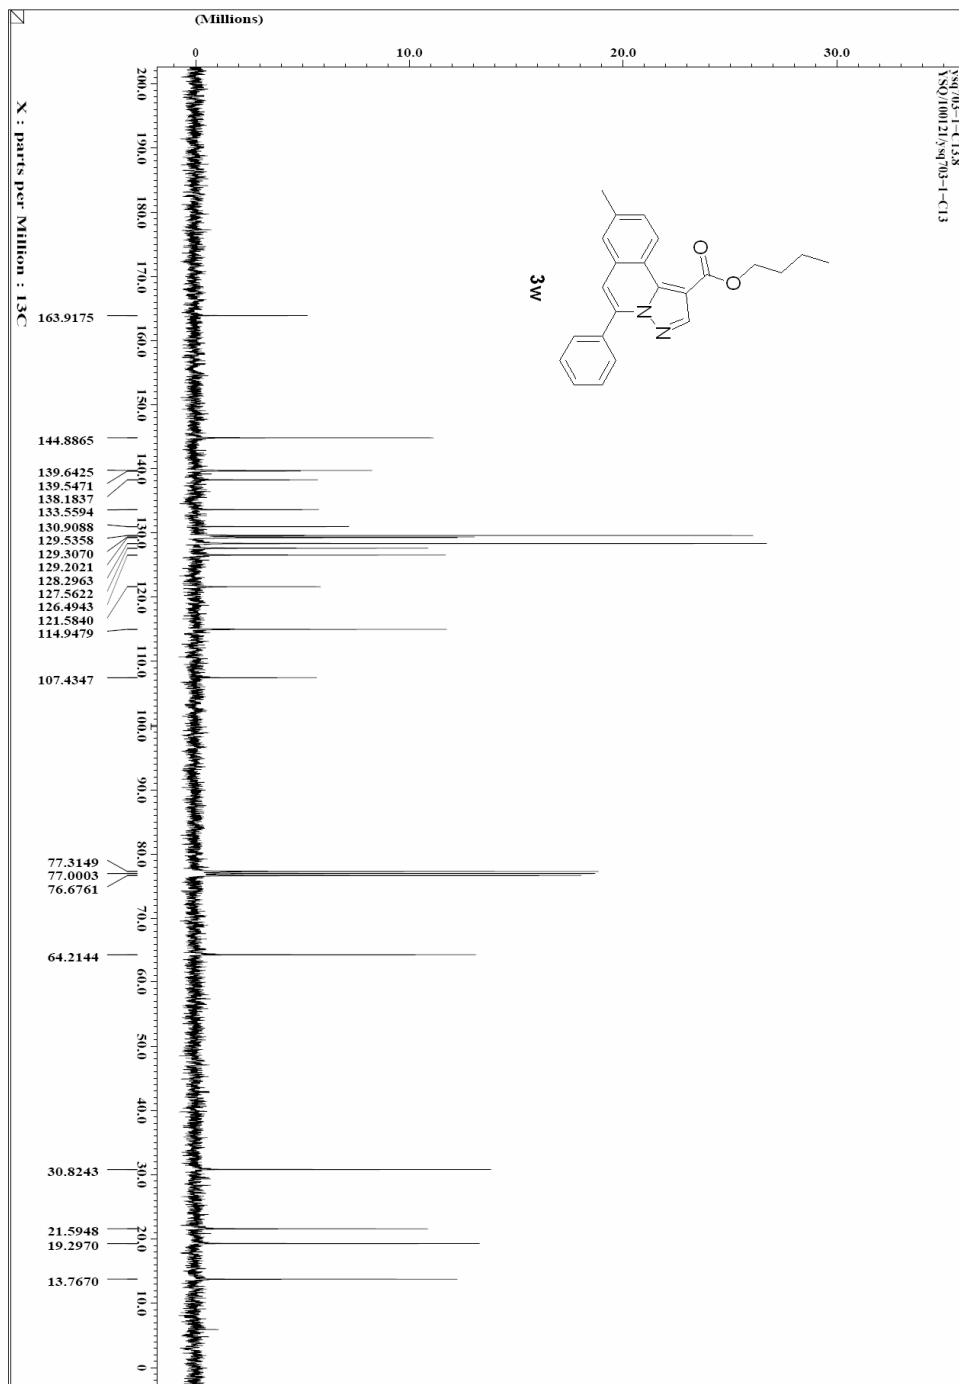

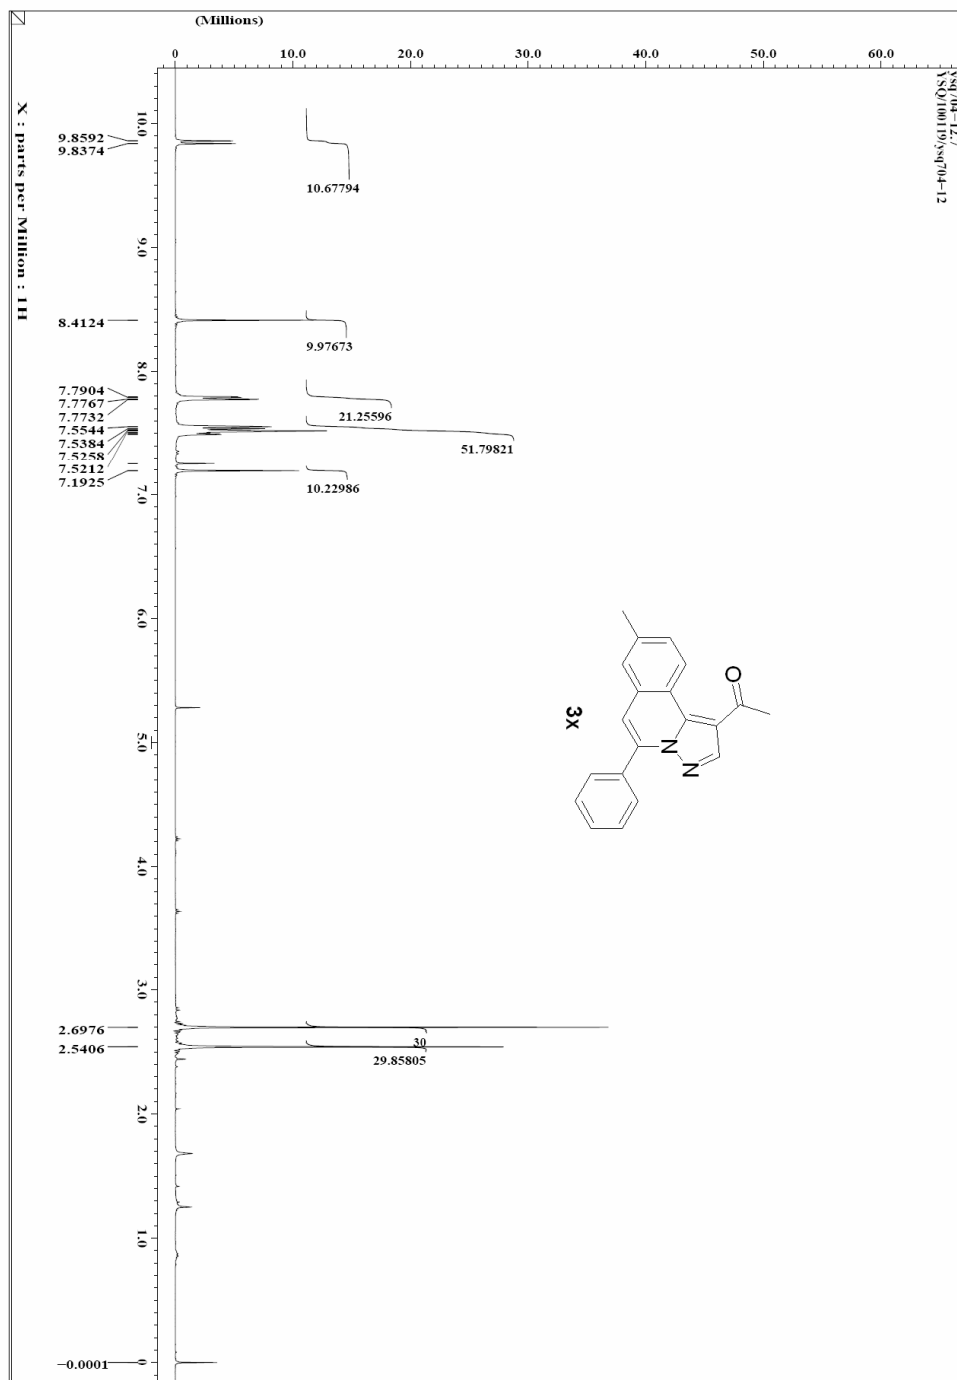

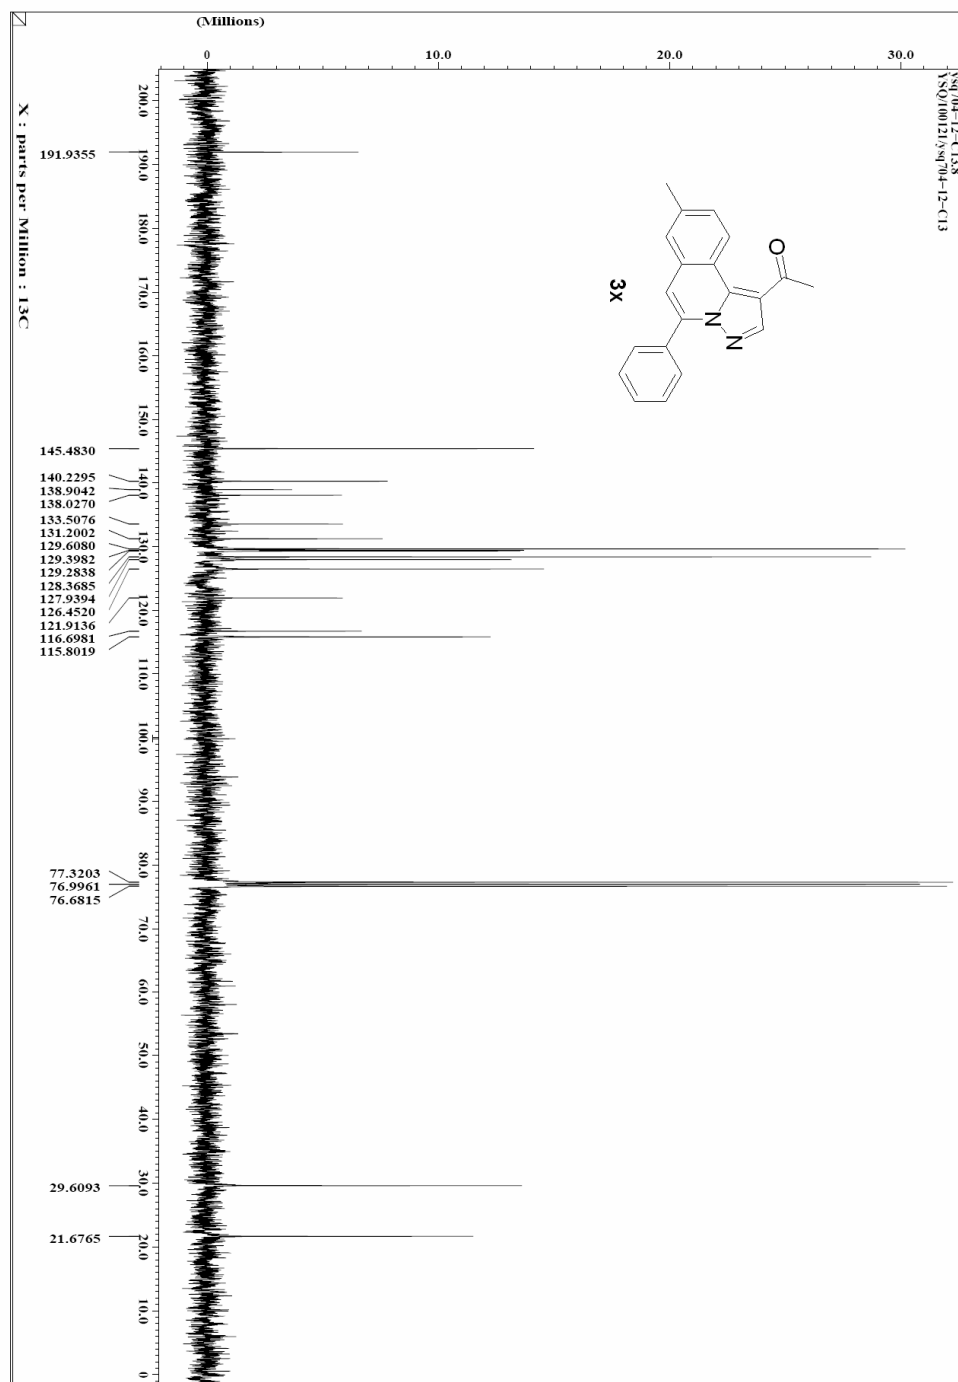



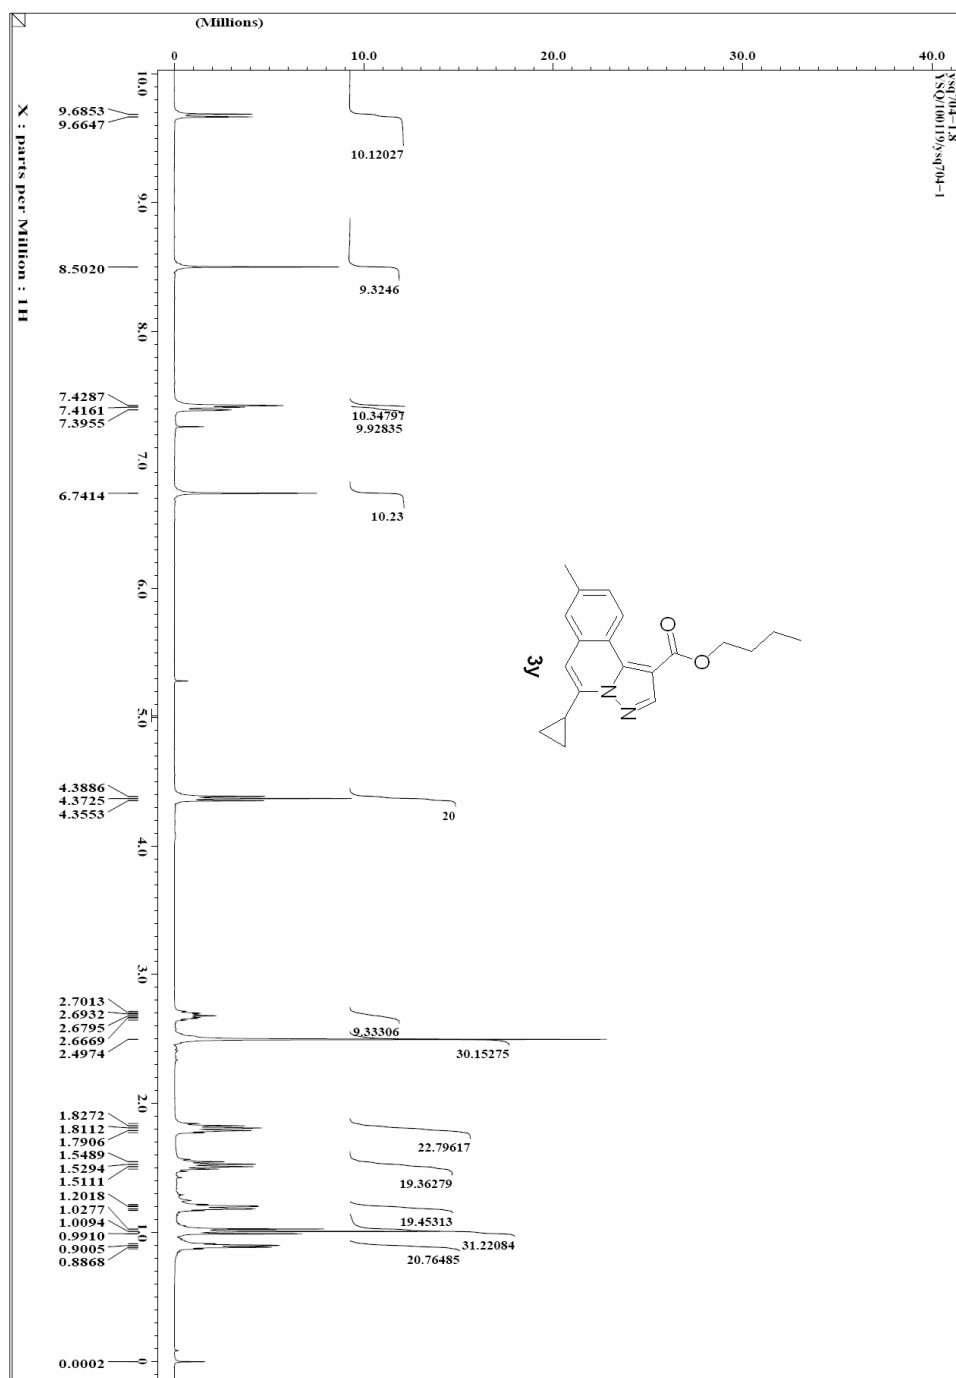

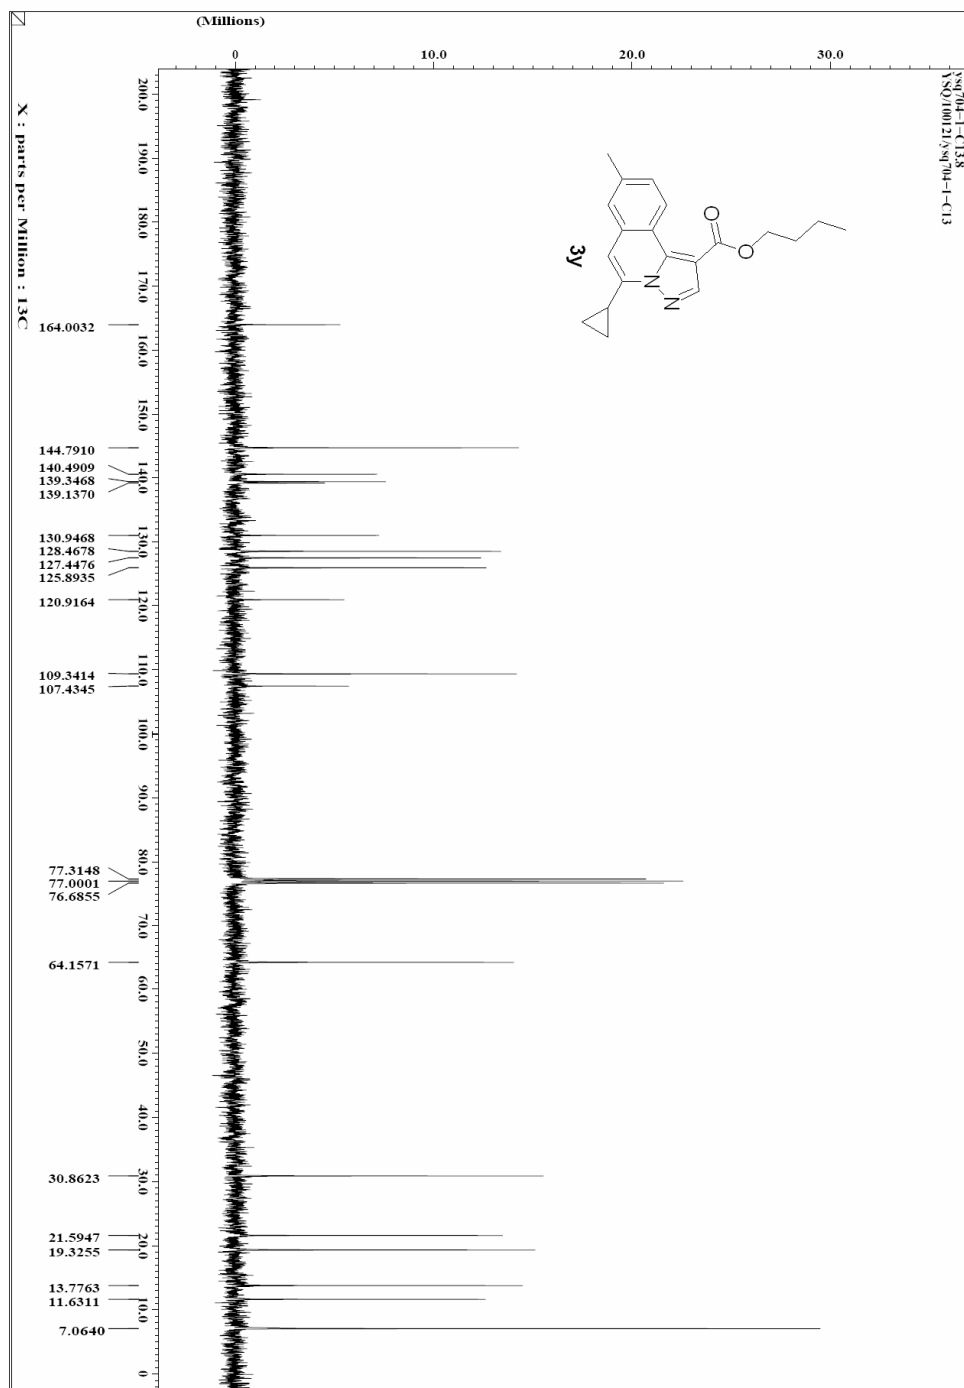

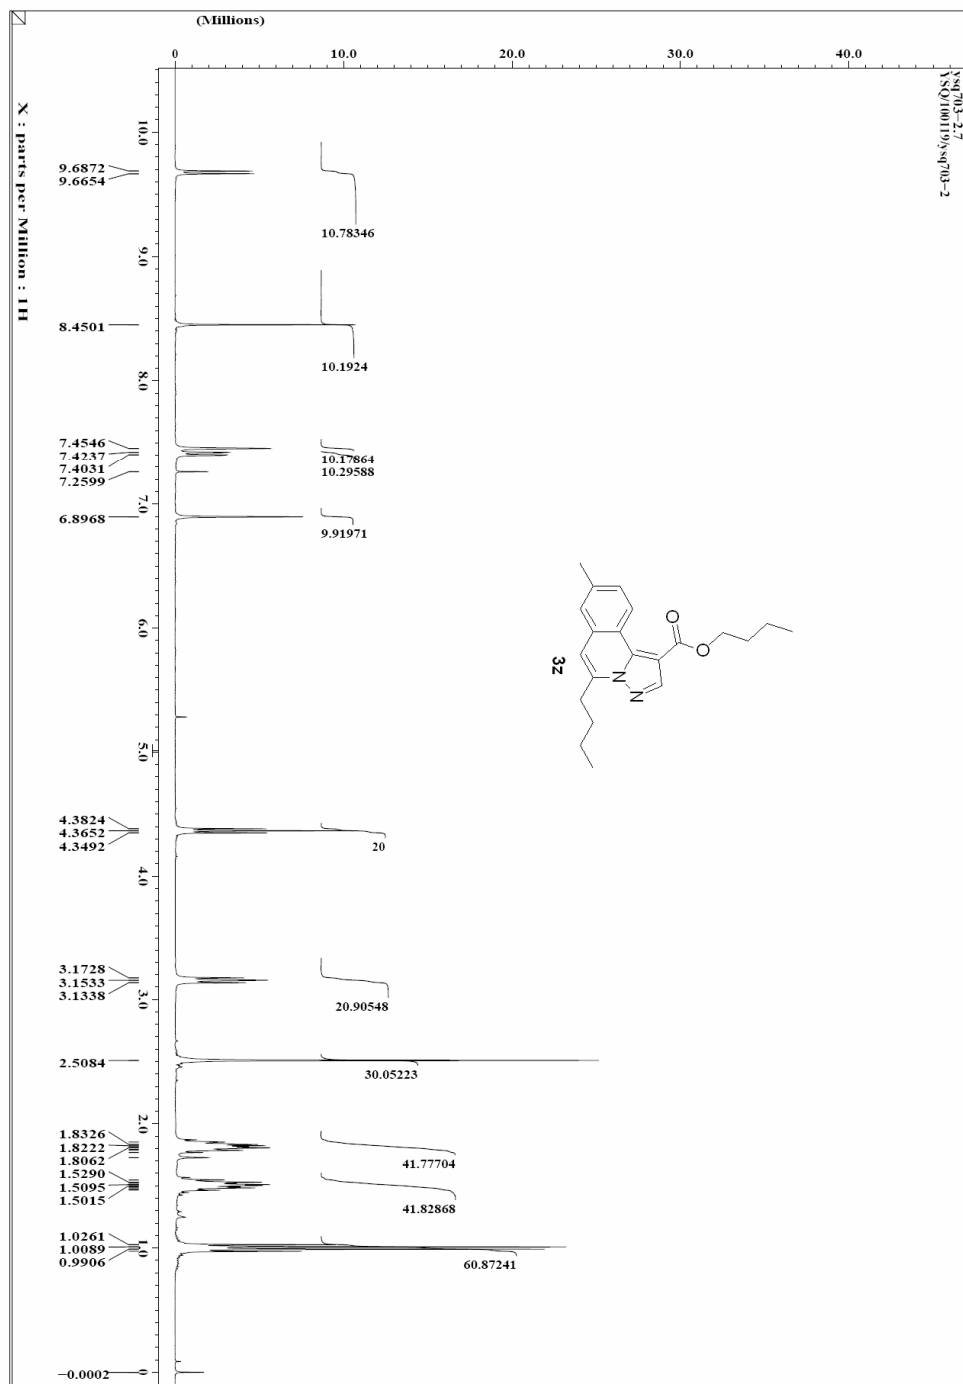

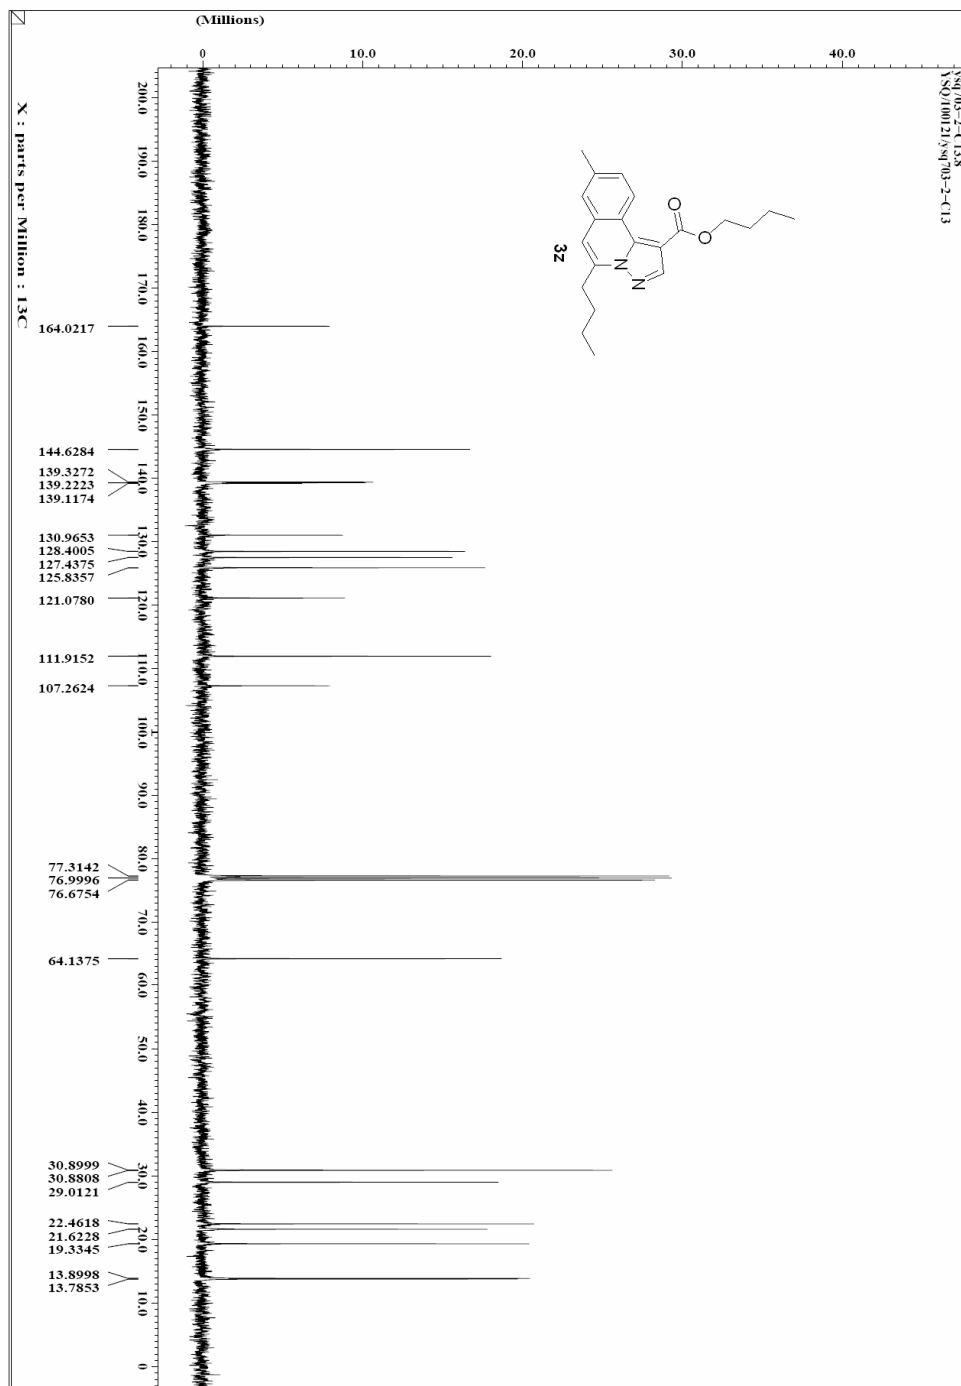

Supplement: c0cc00905a.pdf [file c0cc00905a.pdf]
